# Supplementary material for: Designer pseudopeptides: autofluorescent polygonal tubes via Phe-zipper and triple helix
Source: Royal Society of Chemistry journal article supplement (doi:10.1039/d4sc04023f), 2024-01-01
Supplement: d4sc04023f1.pdf [file d4sc04023f1.pdf]

## Supplementary Information

# Designer Pseudopeptides: Autofluorescent Polygonal Tubes via Phe-zipper and Triple Helix

V. Haridas\*,<sup>a,b</sup> Govind P. Maurya<sup>a</sup> and Souvik Dutta<sup>a</sup>

<sup>a</sup>Department of Chemistry, Indian Institute of Technology Delhi, Hauz Khas, New Delhi-110016, India.

<sup>b</sup>Department of Chemistry, Indian Institute of Technology Palakkad, Palakkad, Kerala- 678623, India.

\* V. Haridas. Email: haridasv@chemistry.iitd.ac.in; haridasv@iitpkd.ac.in

|                                                                                      |         |
|--------------------------------------------------------------------------------------|---------|
| General Information                                                                  | S2-S4   |
| Synthetic schemes                                                                    | S5-S6   |
| General Synthetic Procedures                                                         | S6-S19  |
| NMR titration studies of peptide <b>1</b>                                            | S20     |
| Possibilities of CO-NH hydrogen bonds in peptide <b>1</b>                            | S21     |
| Infrared (IR) spectra comparison of peptide <b>1</b> , <b>2</b> and <b>5</b>         | S22     |
| Concentration dependent NMR studies of peptide <b>1</b>                              | S23     |
| Intermolecular H-bonded structure of peptide <b>1</b>                                | S24     |
| Intermolecular H-bonded supramolecular cylindrical structure of peptide <b>1</b>     | S25     |
| AFM Images of peptide <b>1</b>                                                       | S26     |
| FESEM images of peptide <b>2</b>                                                     | S27     |
| Interplanar angle between two molecules of peptide <b>5</b>                          | S28     |
| UV-vis absorption and fluorescence emission spectra of peptide <b>1</b>              | S29     |
| NMR titration studies of peptide <b>6</b>                                            | S30     |
| UV-vis and CD spectra of peptides <b>6</b> and <b>7</b>                              | S31     |
| CD spectra comparison of peptides <b>6</b> and <b>9</b>                              | S32     |
| NMR titration studies of peptide <b>8</b>                                            | S33     |
| CD spectra of peptides <b>1</b> and <b>8</b>                                         | S34     |
| UV-vis spectra of peptide <b>7</b> on addition of different anions                   | S35     |
| UV-vis and fluorescence spectra studies of peptides <b>6</b> , <b>7</b> and <b>8</b> | S36     |
| Job plots and BH plots for peptides <b>6</b> , <b>7</b> and <b>8</b>                 | S37     |
| NMR titration studies of peptides <b>6</b> and <b>8</b>                              | S38     |
| Histograms showing vesicles' diameters of peptides <b>6</b> , <b>7</b> and <b>8</b>  | S39     |
| NMR and Mass spectral data of all synthesized compounds                              | S40-S84 |
| Table S1: Crystal data of peptide <b>1</b>                                           | S85     |
| Table S2: Crystal data of peptide <b>2</b>                                           | S86     |
| Table S3: Crystal data of peptide <b>5</b>                                           | S87     |
| Table S4: Table showing CSI values of peptide <b>1</b> , <b>2</b> and <b>8</b>       | S88     |
| Table S5: H-bonding distances (Å) and angles (°) present in peptide <b>1</b>         | S88     |

## 1. General Information

### 1.1 Materials

All solvents used were distilled before use. All amino acids were of L-configuration. Reactions were monitored by thin layer chromatography (TLC) using TLC plates purchased from Merck, India. Silica gel 100-200 mesh (SRL, India) was used for purification in column chromatography. <sup>1</sup>H NMR was recorded using Bruker-DPX-400 and 500 MHz spectrometers. Tetramethylsilane (TMS) was used as an internal standard. Coupling constants are recorded in Hz, and the <sup>1</sup>H NMR data are reported as s (singlet), d (doublet), br (broad), t (triplet) and m (multiplet), dd (double of doublet). IR spectra (KBr) pellets was recorded on Nicolet, Protégé 460 spectrometer. Bruker MicrO-TOF-QII model High-resolution mass spectrometer (HRMS) was used for characterization. AVIV Model 410 and BioLogic MOS-500 spectrometers were used for circular dichroism (CD) measurements. Quartz cell of 1mm path length was used for all measurements. A scan speed of 1 nm/min and averaged over 3 scans are employed. Shimadzu UV-2400 double beam spectrophotometer was used for recording UV-visible spectra measurements. FluoroMax-4 spectrofluorometer (HORIBA JOBIN YVON Scientific), was used for recording fluorescence spectra. A slit width of 2 nm excitation and collection were used for data collection. Samples were taken in 3 mL quartz cuvette. Fisher-Scientific melting point apparatus was used for recording melting points. X-ray diffraction analysis was done on a Bruker SMART APEX diffractometer fitted with CCD area detector. Structure solving, and refinement were carried out using the ShelXTL program. All spectroscopic experiments were done at room temperature.

## **1.2 Methods**

### **1.2.1 Scanning Electron Microscopy (SEM)**

Solutions of compounds were prepared by dissolving 1 mg of each compound in 1 mL of acetonitrile (ACN). A glass coverslip was attached to a stub using carbon tape. About 10  $\mu$ L of the solution was drop-casted onto the coverslip and left to dry at room temperature. Further, it was coated with gold ( $\sim$ 10 nm) and analyzed by ZEISS EVO 50 Scanning Electron Microscope. The images captured at room temperature were processed using Image J software.

### **1.2.2 Transmission Electron Microscopy (TEM)**

Samples for TEM were prepared by dissolving the compound in ACN. About 5  $\mu$ L aliquot of the sample solution was placed on a 200 mesh copper grid and allowed to dry at room temperature. Samples were viewed using a TECHNAI G2 (20S-TWIN) electron microscope and were processed using Image J software.

### **1.2.3 Atomic Force Microscopy (AFM)**

Solutions of compounds were prepared by dissolving 1 mg of each compound in 1 mL of ACN. About 100  $\mu$ L of the solution was drop-casted onto a glass slide and left to dry at room temperature. Further, it was analyzed by BRUKER Dimension Icon XR Atomic Force Microscope by tapping mode. The images captured at room temperature were processed using Image J software.

### **1.2.4 Field Emission Scanning Electron Microscopy (FESEM)**

1mg of each compound was dissolved in 1 mL of ACN to make the corresponding solutions. Carbon tape was used to affix a glass coverslip to a stub. Approximately 10 microliters of the solution was drop-casted onto the coverslip, and allowed to air dry at room temperature. Then, a layer of gold ( $\sim$ 10 nm) was applied to the sample, which

was then examined using a ZEISS EVO 18 Scanning Electron Microscope. The photos obtained at room temperature were analyzed using Image J program.

### **1.2.5 NMR titration study**

To 10 mM host solutions, small amounts of DMSO- $d_6$  were added and the NMR spectra were recorded.

### **1.2.6 Confocal Microscopy**

Solutions of compounds were prepared by dissolving 1 mg of each compound in 1 mL of ACN. About 10  $\mu$ L of the solution was drop-casted onto a glass slide and left to dry at room temperature. Further, it was then covered with a cover slip and analyzed at room temperature by LEICA STELLARIS Stimulated Emission Depletion Microscope. The images captured at room temperature and Image J software was used for processing.

### **1.2.7 Job plot calculation**

A series of solutions containing compounds (**6**, **7** and **8**) ( $1 \times 10^{-4}$  M) and anions ( $1 \times 10^{-4}$  M) were prepared in ACN. The mole fraction of the receptors was varied from 0.1 to 1 and the absorbance of each solution is measured at a suitable wavelength and a graph of the corrected absorbance versus mole fraction of X or P was plotted. Maximum absorbance is reached at the composition corresponding to the stoichiometry of the predominant complex.

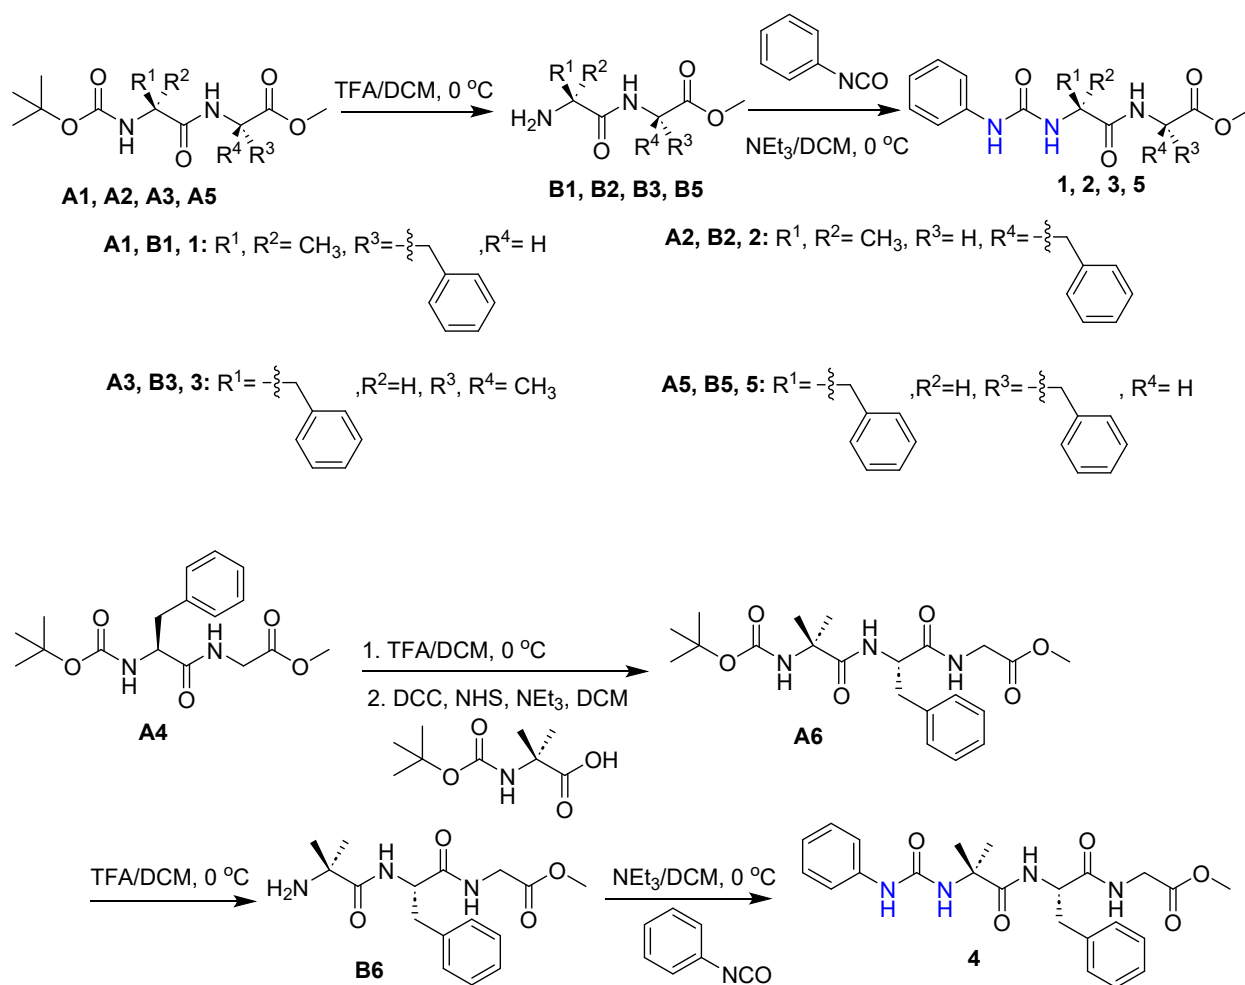

**Scheme S1:** Synthesis of monourea-based peptides **1-5**.

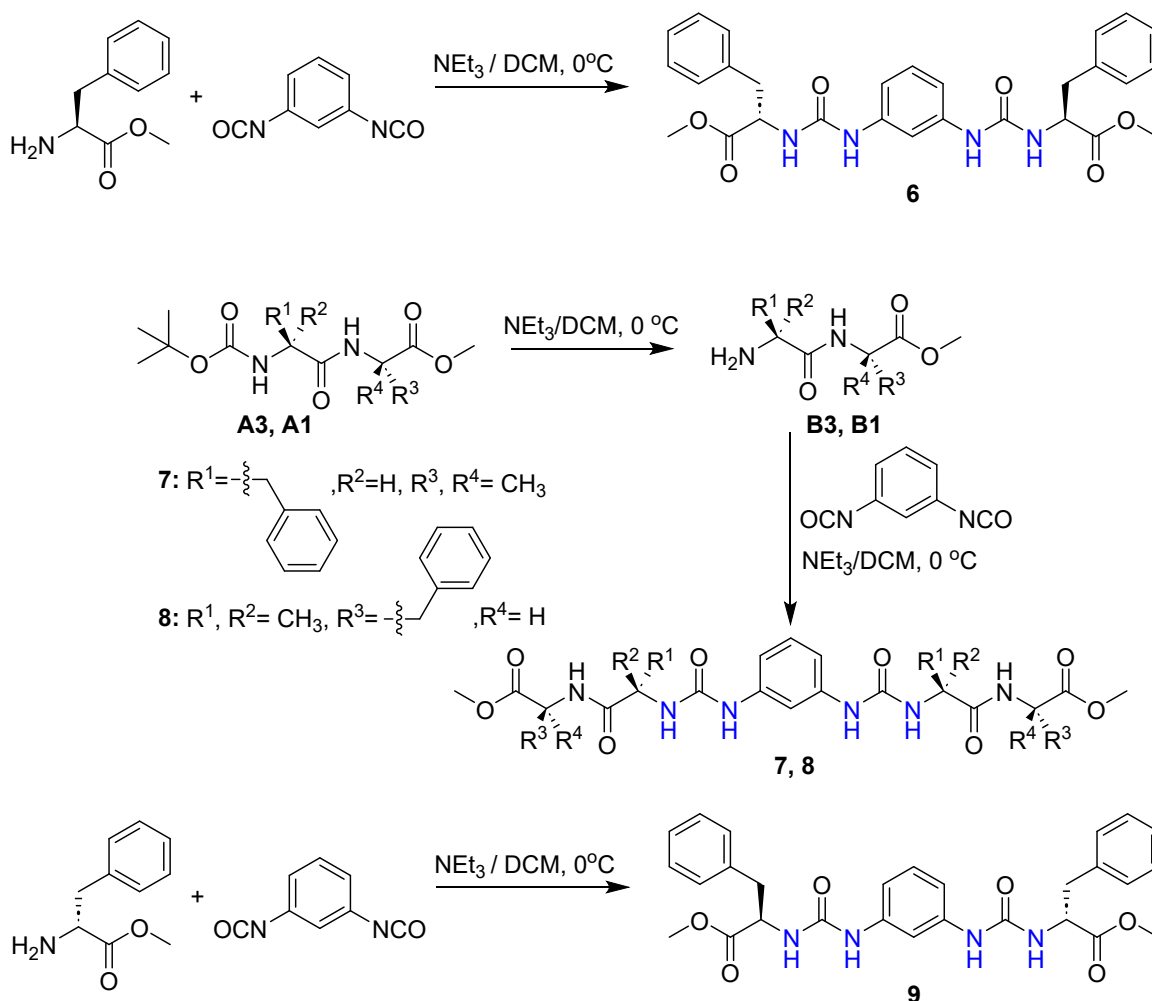

**Scheme S2:** Synthesis of compounds **6-9**.

## 1.3 General Synthetic Procedure

### 1.3.1 Preparation of dipeptide **A1**

To an ice-cooled solution of Boc-Aib-OH, (600 mg, 2.95 mmol) in dry  $\text{CH}_2\text{Cl}_2$  was added NHS (407 mg, 3.54 mmol) and DCC (730 mg, 3.54 mmol) and stirred. After 5 minutes, Phe-OMe.HCl (763 mg, 3.54 mmol) in ~50 mL dry  $\text{CH}_2\text{Cl}_2$  and  $\text{NEt}_3$  (0.49 mL, 3.54 mmol) were added stirred for 24 h. The reaction mixture was filtered, and the clear filtrate obtained was washed sequentially with 0.2N  $\text{H}_2\text{SO}_4$ , aq.  $\text{NaHCO}_3$  solution and finally with water. The organic part was dried over anhydrous  $\text{Na}_2\text{SO}_4$ , evaporated,

and purified by silica gel column chromatography using ethyl acetate and hexane as eluents to afford about 86% yield of **A1**.

MP: 142-144 °C

<sup>1</sup>H NMR (500 MHz, CDCl<sub>3</sub>) δ 1.42 (s, 12H), 1.45 (s, 3H), 3.12 (m, 2H), 3.69 (s, 3H), 4.85 (m, 1H), 6.87 (s, 1H), 7.12 (d, *J* = 10 Hz, 2H), 7.16 – 7.30 (m, 4H).

<sup>13</sup>C NMR (CDCl<sub>3</sub> 125 MHz) δ 25.4, 28.3, 38.1, 52.2, 53.3, 56.7, 80.2, 127.0, 128.5, 129.3, 136.1, 154.6, 172.0, 174.2.

IR (KBr): 3329, 2982, 1754, 1688, 1658, 1522, 1453, 1367, 1284, 1167, 1087 cm<sup>-1</sup>.

HRMS: Calcd. for C<sub>19</sub>H<sub>28</sub>N<sub>2</sub>O<sub>5</sub>Na *m/z* = 387.1896, found *m/z* = 387.1883.

### **1.3.2 Preparation of dipeptide A2**

To an ice-cooled solution of Boc-Aib-OH, (300 mg, 1.48 mmol) in dry CH<sub>2</sub>Cl<sub>2</sub> was added NHS (205 mg, 1.78 mmol) and DCC (367 mg, 1.78 mmol) and stirred. After 5 minutes, D-Phe-OMe.HCl (384 mg, 1.78 mmol) in ~50 mL dry CH<sub>2</sub>Cl<sub>2</sub> and NEt<sub>3</sub> (0.25 mL, 1.78 mmol) were added stirred for 24 h. The reaction mixture was filtered, and the clear filtrate obtained was washed sequentially with 0.2N H<sub>2</sub>SO<sub>4</sub>, aq. NaHCO<sub>3</sub> solution and finally with water. The organic part was dried over anhydrous Na<sub>2</sub>SO<sub>4</sub>, evaporated, and purified by silica gel column chromatography using ethyl acetate and hexane as eluents to afford about 85% yield of **A2**.

MP: 142-144 °C

<sup>1</sup>H NMR (500 MHz, CDCl<sub>3</sub>) δ 1.42 (s, 12H), 1.45 (s, 3H), 3.12 (m, 2H), 3.70 (s, 3H), 4.85 (m, 1H), 6.86 (s, 1H), 7.12 (d, *J* = 10 Hz, 2H), 7.16 – 7.30 (m, 4H).

<sup>13</sup>C NMR (CDCl<sub>3</sub> 125 MHz) δ 25.4, 28.3, 38.1, 52.2, 53.3, 56.7, 80.2, 127.0, 128.5, 129.3, 136.0, 154.5, 172.0, 174.2.

IR (KBr): 3329, 2983, 2935, 1752, 1687, 1656, 1525, 1452, 1366, 1284, 1167, 1082 cm<sup>-1</sup>.

HRMS: Calcd. for  $C_{19}H_{28}N_2O_5Na$   $m/z = 387.1896$ , found  $m/z = 387.1897$ .

### **1.3.3 Preparation of dipeptide A3**

To an ice-cooled solution of Boc-Phe-OH, (900 mg, 3.39 mmol) in dry  $CH_2Cl_2$  was added NHS (468 mg, 4.07 mmol) and DCC (839 mg, 4.07 mmol) and stirred. After 5 minutes, Aib-OMe.HCl (625 mg, 4.07 mmol) in ~50 mL dry  $CH_2Cl_2$  and  $NEt_3$  (0.56 mL, 4.02 mmol) were added stirred for 24 h. The reaction mixture was filtered, and the clear filtrate obtained was washed sequentially with 0.2N  $H_2SO_4$ , aq.  $NaHCO_3$  solution and finally with water. The organic part was dried over anhydrous  $Na_2SO_4$ , evaporated, and purified by silica gel column chromatography using ethyl acetate and hexane as eluents to afford about 92% yield of **A3**.

MP: 106-108 °C

$^1H$  NMR (500 MHz,  $CDCl_3$ )  $\delta$  1.42 (s, 9H), 1.44 (d,  $J = 10.5$  Hz, 6H), 3.01 (dd,  $J = 13.8$ , 7.3 Hz, 1H), 3.08 (dd,  $J = 13.3$ , 5.8 Hz, 1H), 3.71 (s, 3H), 4.30 (m, 1H), 5.14 (br s, 1H), 6.36 (s, 1H), 7.21 – 7.25 (m, 3H), 7.27 – 7.32 (m, 2H).

$^{13}C$  NMR ( $CDCl_3$  125 MHz)  $\delta$  24.5, 24.7, 28.3, 38.5, 52.6, 56.4, 80.1, 126.9, 128.6, 129.5, 136.8, 155.5, 170.3, 174.6.

IR (KBr): 3302, 2983, 1745, 1660, 1539, 1451, 1389, 1279, 1156, 1023  $cm^{-1}$ .

HRMS: Calcd. for  $C_{19}H_{28}N_2O_5Na$   $m/z = 387.1896$ , found  $m/z = 387.1889$ .

### **1.3.4 Preparation of dipeptide A4**

To an ice-cooled solution of Boc-Phe-OH, (600 mg, 2.26 mmol) in dry  $CH_2Cl_2$  was added NHS (312 mg, 2.71 mmol) and DCC (559 mg, 2.71 mmol) and stirred. After 5 minutes, Gly-OMe.HCl (340 mg, 2.71 mmol) in ~50 mL dry  $CH_2Cl_2$  and  $NEt_3$  (0.38 mL, 2.71 mmol) were added stirred for 24 h. The reaction mixture was filtered, and the clear filtrate obtained was washed sequentially with 0.2N  $H_2SO_4$ , aq.  $NaHCO_3$  solution and finally with water. The organic part was dried over anhydrous  $Na_2SO_4$ , evaporated,



and purified by silica gel column chromatography using ethyl acetate and hexane as eluents to afford about 81% yield of **A4**.

MP: 84-86 °C

<sup>1</sup>H NMR (500 MHz, CDCl<sub>3</sub>) δ 1.40 (s, 9H), 3.03-3.15 (m, 2H), 3.73 (s, 3H), 3.96-4.05 (m, 2H), 4.42 (m, 1H), 5.03 (br s, 1H), 6.46 (br s, 1H), 7.16-7.32 (m, 5H).

<sup>13</sup>C NMR (CDCl<sub>3</sub> 125 MHz) δ 28.2, 38.3, 41.2, 52.4, 55.6, 80.3, 127.0, 128.7, 129.3, 136.5, 155.2, 169.9, 171.6.

IR (KBr): 3327, 2930, 2857, 1760, 1691, 1662, 1535, 1447, 1370, 1209, 1164, 1024 cm<sup>-1</sup>.

HRMS: Calcd. for C<sub>17</sub>H<sub>24</sub>N<sub>2</sub>O<sub>5</sub>Na m/z = 359.1583, found m/z = 359.1575.

### **1.3.5 Preparation of dipeptide A5**

To an ice-cooled solution of Boc-Phe-OH, (300 mg, 1.13 mmol) in dry CH<sub>2</sub>Cl<sub>2</sub> was added NHS (156 mg, 1.36 mmol) and DCC (281 mg, 1.36 mmol) and stirred. After 5 minutes, Phe-OMe.HCl (293 mg, 1.36 mmol) in ~50 mL dry CH<sub>2</sub>Cl<sub>2</sub> and NEt<sub>3</sub> (0.19 mL, 1.36 mmol) were added stirred for 24 h. The reaction mixture was filtered, and the clear filtrate obtained was washed sequentially with 0.2N H<sub>2</sub>SO<sub>4</sub>, aq. NaHCO<sub>3</sub> solution and finally with water. The organic part was dried over anhydrous Na<sub>2</sub>SO<sub>4</sub>, evaporated, and purified by silica gel column chromatography using ethyl acetate and hexane as eluents to afford about 88% yield of **A5**.

MP: 114-116 °C

<sup>1</sup>H NMR (500 MHz, CDCl<sub>3</sub>) δ 1.40 (s, 9H), 3.00-3.22 (m, 4H), 3.67 (s, 3H), 4.33 (m, 1H), 4.78 (m, 1H), 4.91 (br s, 1H), 6.24 (d, J= 6.5 Hz, 1H), 6.96-7.31 (m, 10H).

<sup>13</sup>C NMR (CDCl<sub>3</sub> 125 MHz) δ 28.2, 38.0, 38.2, 52.3, 53.3, 55.7, 80.2, 127.0, 127.1, 128.5, 128.7, 129.2, 129.4, 135.6, 136.5, 155.3, 170.8, 171.4.

IR (KBr): 3331, 3027, 2976, 2930, 1744, 1662, 1525, 1445, 1252, 1168, 1031 cm<sup>-1</sup>.

HRMS: Calcd. for  $C_{24}H_{30}N_2O_5Na$   $m/z = 449.2052$ , found  $m/z = 449.2042$ .

### 1.3.6 Preparation of tripeptide **A6**

To an ice cold solution of **A4** (400 mg, 1.19 mmol) in ~20 mL dry DCM was added TFA (8 mL) and kept stirred for 3 h. The reaction was monitored by TLC and after completion, the reaction mixture was evaporated under a high vacuum with a KOH trap to afford N-deprotected derivative **B4**.

To an ice-cooled solution of Boc-Aib-OH, (291 mg, 1.43 mmol) in dry  $CH_2Cl_2$  was added NHS (164 mg, 1.43 mmol) and DCC (285 mg, 1.43 mmol) and stirred. After 5 minutes, an ice cold solution of N-deprotected derivative **B4** (1.19 mmol) with  $NEt_3$  (0.37 mL, 2.62 mmol) were added and stirred for 24 h. The reaction mixture was filtered, and the clear filtrate obtained was washed sequentially with 0.2N  $H_2SO_4$ , aq.  $NaHCO_3$  solution and finally with water. The organic part was dried over anhydrous  $Na_2SO_4$ , evaporated, and purified by silica gel column chromatography using ethyl acetate and hexane as eluents to afford about 86% yield of **A6**.

MP: 126-128 °C

$^1H$  NMR (500 MHz,  $CDCl_3$ )  $\delta$  1.19 (s, 3H), 1.35 (s, 9H), 1.42 (s, 3H), 3.18 (dd,  $J = 14.3, 7.8$  Hz, 1H), 3.28 (dd,  $J = 14.4, 5.6$  Hz, 1H), 3.71 (s, 3H), 3.79 (dd,  $J = 17.6, 5.3$  Hz, 1H), 4.15 (dd,  $J = 17.6, 6.1$  Hz, 1H), 4.74-4.83 (m, 2H), 6.42 (d,  $J = 9.1$  Hz, 1H), 7.21-7.33 (m, 5H), 7.53 (br s, 1H)

$^{13}C$  NMR ( $CDCl_3$  125 MHz)  $\delta$  24.0, 26.5, 28.2, 37.0, 41.2, 52.1, 53.4, 56.8, 81.0, 126.9, 128.7, 129.2, 136.7, 155.4, 170.0, 171.7, 173.9.

IR (KBr): 3320, 2928, 2853, 1758, 1694, 1659, 1512, 1453, 1367, 1288, 1166, 1079  $cm^{-1}$ .

HRMS: Calcd. for  $C_{21}H_{31}N_3O_6Na$   $m/z = 444.2111$ , found  $m/z = 444.2098$ .

### 1.3.7 Preparation of **1**

To an ice cold solution of **A1** (400 mg, 1.10 mmol) in ~20 mL dry DCM was added TFA (8 mL) and kept stirred for 3 h. The reaction was monitored by TLC and after completion, the reaction mixture was evaporated under a high vacuum with a KOH trap to afford N-deprotected derivative.

To an ice cold solution of N-deprotected derivative **B1** (1.10 mmol) with NEt<sub>3</sub> (0.15 mL, 1.10 mmol) in ~50 mL dry DCM was added phenylisocyanate (131 mg, 1.10 mmol) dropwise and the reaction mixture was kept stirred for 12 h. The reaction was monitored by TLC and after completion, the reaction mixture washed with 0.2 N H<sub>2</sub>SO<sub>4</sub>, saturated aqueous NaHCO<sub>3</sub>, and water. Dried over anhydrous Na<sub>2</sub>SO<sub>4</sub> followed by evaporation. The obtained crude product was further purified by washing several times with EtOAc to afford 358 mg of pure product.

Yield: 85%

MP: 204-206 °C

[α]<sub>D</sub><sup>26</sup>: +16.

<sup>1</sup>H NMR (500 MHz, CD<sub>3</sub>CN) δ 1.30 (s, 3H), 1.32 (s, 3H), 2.94 (dd, 1H, *J* = 13.0, 7.5 Hz), 2.99 (dd, 1H, *J* = 14.0, 5.0 Hz), 3.56 (s, 3H), 4.57 (m, 1H), 5.51 (s, 1H), 6.91 (t, *J* = 7.0 Hz, 1H), 7.02 (d, *J* = 6.0 Hz, 1H), 7.08 (br s, 5H), 7.19 (t, *J* = 7 Hz, 3H), 7.31 (d, *J* = 7.5 Hz, 2H).

<sup>13</sup>C NMR (DMSO-d<sub>6</sub>, 125 MHz), δ 24.9, 25.2, 36.5, 51.8, 53.5, 55.5, 117.5, 121.0, 126.4, 128.1, 128.6, 129.2, 137.2, 140.4, 154.0, 171.8, 174.6.

IR (KBr): 3387, 3348, 3266, 3025, 1737, 1671, 1644, 1600, 1546, 1519, 1438, 1363, 1316, 1238 cm<sup>-1</sup>.

HRMS: Calcd. for C<sub>21</sub>H<sub>25</sub>N<sub>3</sub>O<sub>4</sub>Na *m/z* = 406.1743, found *m/z* = 406.1734.

### **1.3.8 Preparation of 2**

To an ice cold solution of **A2** (400 mg, 1.10 mmol) in ~20 mL dry DCM was added TFA (8 mL) and kept stirred for 3 h. The reaction was monitored by TLC and after completion, the reaction mixture was evaporated under a high vacuum with a KOH trap to afford N-deprotected derivative.

To an ice cold solution of N-deprotected derivative **B2** (1.10 mmol) and NEt<sub>3</sub> (0.15 mL, 1.10 mmol) in dry DCM (~50 mL) was added phenylisocyanate (131 mg, 1.10 mmol) dropwise and the reaction mixture was kept stirred for 12 h. The reaction was monitored by TLC and after completion, the reaction mixture washed with 0.2 N H<sub>2</sub>SO<sub>4</sub>, saturated aqueous NaHCO<sub>3</sub>, and water. Dried over anhydrous Na<sub>2</sub>SO<sub>4</sub> followed by evaporation. The obtained crude product was further purified by washing several time with EtOAc to afford 367 mg pure product.

Yield: 87%

MP: 204-206 °C

[α]<sub>D</sub><sup>26</sup>: -16°

<sup>1</sup>H NMR (500 MHz, CD<sub>3</sub>CN) δ 1.30 (s, 3H), 1.32 (s, 3H), 2.94 (dd, *J* = 13.5, 7.0 Hz, 1H), 2.99 (dd, *J* = 14.0, 5.5 Hz, 1H), 3.56 (s, 3H), 4.57 (m, 1H), 5.54 (s, 1H), 6.91 (t, *J* = 7.5 Hz, 1H), 7.00 (d, *J* = 8.0 Hz, 1H), 7.08 (br s, 6H), 7.19 (t, *J* = 7.5 Hz, 2H), 7.31 (d, *J* = 7.5 Hz, 2H).

<sup>13</sup>C NMR (CDCl<sub>3</sub>, 125 MHz), δ 25.5, 25.8, 37.8, 52.4, 53.3, 57.0, 120.7, 123.9, 127.1, 128.5, 129.2, 129.4, 135.8, 138.4, 154.6, 172.1, 174.8.

IR (KBr): 3385, 3352, 3270, 3013, 2987, 2947, 1737, 1668, 1647, 1597, 1547, 1518, 1439, 1390, 1362, 1316, 1263, 1241, 1216, 1108, 1019, 965, 883, 748, 696, 656, 585, 502 cm<sup>-1</sup>.

HRMS: Calcd. for C<sub>21</sub>H<sub>25</sub>N<sub>3</sub>O<sub>4</sub>Na *m/z* = 406.1743, found *m/z* = 406.1742.

### **1.3.9 Preparation of 3**

To an ice cold solution of **A3** (500 mg, 1.37 mmol) in ~20 mL dry DCM was added TFA (8 mL) and kept stirred for 3 h. The reaction was monitored by TLC and after completion, the reaction mixture was evaporated under a high vacuum with a KOH trap and afford N-protected derivative.

To an ice cold solution of N-protected derivative **B3** (1.37 mmol) with NEt<sub>3</sub> (0.19 mL, 1.37 mmol) in ~50 mL dry DCM was added phenylisocyanate (163 mg, 1.37 mmol) dropwise and the reaction mixture was kept stirred for 12 h. The reaction was monitored by TLC and after completion, the reaction mixture washed with 0.2 N H<sub>2</sub>SO<sub>4</sub>, saturated aqueous NaHCO<sub>3</sub>, and water, dried over anhydrous Na<sub>2</sub>SO<sub>4</sub> and evaporated. The obtained crude product further purified by column chromatography using EtOAc /hexane solvent and afford 483 mg product.

Yield: 91%

MP: 162-164 °C

[α]<sub>D</sub><sup>26</sup>: -8.

<sup>1</sup>H NMR (500 MHz, CDCl<sub>3</sub>) δ 1.41 (s, 6H), 2.92 (dd, *J* = 14.0, 8.0 Hz, 1H), 3.11 (dd, *J* = 13.5, 5.5 Hz, 1H), 3.63 (s, 3H), 4.53 (m, 1H), 5.74 (d, *J* = 7.5 Hz, 1H), 6.97 (t, *J* = 7.5 Hz, 1H), 7.17 (s, 1H), 7.24 (m, 4H), 7.32 (m, 5H), 7.40 (s, 1H).

<sup>13</sup>C NMR (CDCl<sub>3</sub>, 125 MHz), δ 24.8, 24.9, 39.0, 52.4, 55.5, 56.2, 119.8, 122.5, 126.8, 128.4, 128.6, 129.5, 137.1, 139.0, 156.0, 173.3, 174.8.

IR (KBr): 3285, 3069, 2946, 1741, 1645, 1551, 1442, 1289, 1234, 1152 cm<sup>-1</sup>.

HRMS: Calcd. for C<sub>21</sub>H<sub>25</sub>N<sub>3</sub>O<sub>4</sub>Na *m/z* = 406.1743, found *m/z* = 406.1737.

### **1.3.10 Preparation of 4**

To an ice cold solution of **A6** (400 mg, 0.95 mmol) in ~20 mL dry DCM was added TFA (8 mL) and kept stirred for 3 h. The reaction was monitored by TLC and after

completion, the reaction mixture was evaporated under a high vacuum with a KOH trap to afford N-deprotected derivative.

To an ice cold solution of N-deprotected derivative **B6** (0.95 mmol) with  $\text{NEt}_3$  (0.13 mL, 0.95 mmol) in dry DCM (~50 mL) was added phenylisocyanate (113 mg, 0.95 mmol) dropwise and the reaction mixture was kept stirred for 12 h. The reaction was monitored by TLC and after completion, the reaction mixture washed with 0.2 N  $\text{H}_2\text{SO}_4$ , saturated aqueous  $\text{NaHCO}_3$ , and water. Dried over anhydrous  $\text{Na}_2\text{SO}_4$  and evaporated. The obtained crude product was further purified by washing several time with EtOAc to afford 368 mg pure product.

Yield: 88%

MP: 94-96 °C

$[\alpha]_{\text{D}}^{26}$ : +82.

$^1\text{H}$  NMR (500 MHz,  $\text{CD}_3\text{CN}$ )  $\delta$  0.99 (s, 3H), 1.26 (s, 3H), 2.79 (dd, 1H,  $J = 18, 14$  Hz), 3.29 (dd, 1H,  $J = 17.5, 5.0$  Hz), 3.51 (s, 3H), 3.74 (m, 2H), 4.49 (m, 1H), 5.60 (br s, 1H), 6.92-7.31 (m, 12H), 7.97 (t,  $J = 8$  Hz, 1H).

$^{13}\text{C}$  NMR ( $\text{CD}_3\text{CN}$ , 125 MHz),  $\delta$  23.9, 26.6, 36.6, 41.3, 52.1, 54.7, 56.9, 119.2, 123.0, 126.9, 128.8, 129.4, 129.7, 139.0, 140.0, 156.1, 170.6, 172.7, 175.4.

IR (KBr): 3531, 3435, 3326, 2929, 1748, 1675, 1648, 1600, 1547, 1312, 1211, 748, 697  $\text{cm}^{-1}$ .

HRMS: Calcd. for  $\text{C}_{23}\text{H}_{28}\text{N}_4\text{O}_5\text{Na}$   $m/z = 463.1957$ , found  $m/z = 463.1967$ .

### **1.3.11 Preparation of 5**

To an ice cold solution of **A5** (400 mg, 0.94 mmol) in ~20 mL dry DCM was added TFA (8 mL) and kept stirred for 3 h. The reaction was monitored by TLC and after completion, the reaction mixture was evaporated under a high vacuum with a KOH trap and afford N-deprotected derivative.

To an ice cold solution of N-protected derivative **B5** (0.94 mmol) with  $\text{NEt}_3$  (0.13 mL, 0.94 mmol) in ~50 mL dry DCM was added phenylisocyanate (112 mg, 0.94 mmol) dropwise and the reaction mixture was kept stirred for 12 h. The reaction was monitored by TLC and after completion, the reaction mixture washed with 0.2 N  $\text{H}_2\text{SO}_4$ , saturated aqueous  $\text{NaHCO}_3$ , and water. Dried over anhydrous  $\text{Na}_2\text{SO}_4$  followed by evaporation. The obtained crude product was further purified by washing several time with EtOAc to afford 360 mg pure product.

Yield: 86%

MP: 208-210 °C

$[\alpha]_D^{26}$ : -20°

$^1\text{H}$  NMR (500 MHz,  $\text{CD}_3\text{CN}$ )  $\delta$  2.76 (dd,  $J = 14.0, 8.5$  Hz, 1H), 2.90 (dd,  $J = 14.0, 8.0$  Hz, 1H), 3.02 (m, 2H), 3.57 (s, 3H), 4.41 (m, 1H), 4.57 (m, 1H), 5.30 (d,  $J = 7.5$  Hz, 1H), 6.89 (t,  $J = 7.5$  Hz, 1H), 6.95 (t,  $J = 7.5$  Hz, 1H), 6.99 (d,  $J = 7.0$  Hz, 1H).

$^{13}\text{C}$  NMR ( $\text{CDCl}_3$ , 125 MHz),  $\delta$  37.8, 38.6, 52.3, 53.8, 55.1, 120.5, 121.1, 123.6, 124.2, 127.1, 128.6, 129.2, 129.4, 135.5, 136.6, 138.1, 138.4, 155.4, 171.3, 172.0

IR (KBr): 3333, 3076, 2930, 2857, 1743, 1646, 1603, 1556, 1497, 1443, 1374, 1318, 1214  $\text{cm}^{-1}$ .

HRMS: Calcd. for  $\text{C}_{26}\text{H}_{28}\text{N}_3\text{O}_4$   $m/z = 446.2080$ , found  $m/z = 446.2100$ ; for  $\text{C}_{26}\text{H}_{27}\text{N}_3\text{O}_4\text{Na}$   $m/z = 468.1899$ , found  $m/z = 468.1922$ , for  $\text{C}_{26}\text{H}_{27}\text{N}_3\text{O}_4\text{K}$   $m/z = 484.1639$ , found  $m/z = 484.1656$ .

### **1.3.12 Preparation of 6**

To a stirred solution of Phe-OMe.HCl (500 mg, 2.32 mmol) and  $\text{NEt}_3$  (0.32 mL, 2.32 mmol) in ~50 mL dry DCM under ice cold condition, 1,3-phenyldiisocyanate (185.8 mg 1.16 mmol) was added drop wise and stirred the reaction mixture for 12 h. After completion of reaction, reaction mixture was washed with 0.2N  $\text{H}_2\text{SO}_4$ , saturated

NaHCO<sub>3</sub> and finally with water. The organic part was dried over anhydrous Na<sub>2</sub>SO<sub>4</sub> and evaporated. The obtained crude product was purified by column chromatography using EtOAc/hexane solvent and afford 350 mg product.

Yield: 68%

MP: 194-196 °C.

[α]<sup>26</sup><sub>D</sub>: +42.

<sup>1</sup>H NMR (500 MHz, CD<sub>3</sub>CN) δ 3.03 (dd, *J* = 14.0, 7.5 Hz, 2H), 3.14 (dd, *J* = 14.0, 5.5 Hz, 2H), 3.69 (s, 6H), 4.64 (m, 2H), 5.49 (d, *J* = 8.0 Hz, 2H), 6.95 (dd, *J* = 8.0, 1.5 Hz, 2H), 7.11 (t, *J* = 8.0 Hz, 1H), 7.25 (m, 6H), 7.35 (m, 6H), 7.53 (br s, *J* = 2.5 Hz, 1H).

<sup>13</sup>C NMR (CDCl<sub>3</sub>, 125 MHz), δ 38.2, 52.3, 54.2, 111.2, 114.7, 127.1, 128.5, 129.2, 129.3, 136.2, 139.0, 155.4, 173.9.

IR (KBr): 3330, 3029, 2949, 1740, 1644, 1555, 1492, 1441, 1357, 1210, 1074, 1023 cm<sup>-1</sup>.

HRMS: Calcd. for C<sub>28</sub>H<sub>30</sub>N<sub>4</sub>O<sub>6</sub>Na *m/z* = 541.2063, found *m/z* = 541.2056.

### **1.3.13 Preparation of 7**

To an ice cold solution of **A3** (500 mg, 1.37 mmol) in ~20 mL dry DCM was added TFA (8 mL) and kept stirred for 4 h. The reaction was monitored by TLC and after completion, the reaction mixture was evaporated under a high vacuum with a KOH trap to afford N-deprotected derivative.

To an ice cold solution of N-deprotected derivative **B3** (1.37 mmol) with NEt<sub>3</sub> (0.19 mL, 1.37mmol) in dry DCM was added a solution of 1,3-phenyldiisocyanate (110 mg, 0.68 mmol) drop wise and the reaction mixture was kept stirred for 12 h. The reaction was monitored by TLC and after completion, the reaction mixture washed with 0.2 N H<sub>2</sub>SO<sub>4</sub>, saturated aqueous NaHCO<sub>3</sub>, and water. Dried over anhydrous Na<sub>2</sub>SO<sub>4</sub>



followed by evaporation. The obtained crude product was further purified by column chromatography using ethylacetate /hexane solvent to afford 311 mg product.

Yield: 66%

MP: 166-168 °C.

$[\alpha]_D^{26}$ : -20.

$^1\text{H}$  NMR (500 MHz,  $\text{CD}_3\text{CN}$ )  $\delta$  1.48 (s+s, 12H), 2.86 (dd,  $J = 13.8, 9.2$  Hz, 2H), 3.11 (dd,  $J = 14, 5.0$  Hz, 2H), 3.60 (s, 6H), 4.58 (m, 2H), 6.81 (s, 2H), 7.22 (m, 5H), 7.28 (m, 9H), 7.39 – 7.71 (m, 2H).

$^{13}\text{C}$  NMR (DMSO, 125 MHz),  $\delta$  24.7, 25.1, 51.9, 53.3, 55.1, 106.7, 110.6, 126.3, 128.0, 128.9, 129.5, 137.4, 140.7, 154.4, 170.9, 174.3.

IR (KBr): 3356, 3300, 3065, 2928, 1740, 1650, 1550, 1492, 1387, 1288, 1235, 1154  $\text{cm}^{-1}$ .

HRMS: Calcd. for  $\text{C}_{36}\text{H}_{44}\text{N}_6\text{O}_8\text{Na}$   $m/z = 711.3118$ , found  $m/z = 711.3119$ .

### **1.3.14 Preparation of 8**

To an ice cold solution of **A1** (500 mg, 1.37 mmol) in ~20 mL dry DCM was added TFA (8 mL) and kept stirred for 4 h. The reaction was monitored by TLC and after completion, the reaction mixture was evaporated under a high vacuum with a KOH trap to afford N-deprotected derivative.

To an ice cold solution of N-deprotected derivative **B1** (1.37 mmol) with  $\text{NEt}_3$  (0.19 mL, 1.37 mmol) in dry DCM was added a solution of 1,3-phenyldiisocyanate (110 mg, 0.69 mmol) in DCM and the reaction mixture was kept stirred for 12 h. The reaction was monitored by TLC and after completion, the reaction mixture washed with 0.2 N  $\text{H}_2\text{SO}_4$ , saturated aqueous  $\text{NaHCO}_3$ , and water. Dried over anhydrous  $\text{Na}_2\text{SO}_4$  followed by evaporation. The crude product was further purified by column chromatography using EtOAc/hexane solvent and afford 304 mg product.

Yield: 64%

MP: 112-114 °C.

$[\alpha]_D^{26}$ : +5.

$^1\text{H}$  NMR (500 MHz,  $\text{CD}_3\text{CN}$ )  $\delta$  1.40 (s+s, 12H), 3.1 (m, 4H), 3.65 (s, 19H), 4.67 (m, 2H), 5.58 (s, 2H), 7.05 (dd,  $J = 8.0, 1.5$  Hz, 2H), 7.10 (d,  $J = 8.0$  Hz, 2H), 7.18 (m, 13H), 7.33 (s, 2H), 7.64 (s, 1H).

$^{13}\text{C}$  NMR ( $\text{CDCl}_3$ , 125 MHz),  $\delta$  25.9, 37.9, 52.3, 53.6, 56.6, 127.1, 128.6, 129.5, 136.1, 139.9, 155.3, 172.2, 175.9.

IR (KBr): 3353, 2944, 1743, 1658, 1547, 1445, 1361, 1241, 1169, 1021  $\text{cm}^{-1}$ .

HRMS: Calcd. for  $\text{C}_{36}\text{H}_{44}\text{N}_6\text{O}_8\text{Na}$   $m/z = 711.3118$ , found  $m/z = 711.3137$ .

### **1.3.15 Preparation of 9**

To a stirred solution of D-Phe-OMe.HCl, (500 mg, 2.32 mmol) and  $\text{NEt}_3$  (0.32 mL, 2.32 mmol) in dry DCM under ice cold condition, a solution of 1,3-phenyldiisocyanate (185.8 mg 1.16 mmol) in dry DCM was added dropwise and stirred the reaction mixture for 12 h. After completion of reaction, reaction mixture was washed with 0.2N  $\text{H}_2\text{SO}_4$ , saturated  $\text{NaHCO}_3$  and finally with water. The organic part was dried over anhydrous  $\text{Na}_2\text{SO}_4$  and evaporated. The crude product was purified by column chromatography using EtOAc/hexane solvent to afford 525 mg product.

Yield: 87%.

$[\alpha]_D^{26}$ : -46.

$^1\text{H}$  NMR (500 MHz,  $\text{CD}_3\text{CN}$ )  $\delta$  3.03 (dd,  $J = 14.0, 7.5$  Hz, 2H), 3.14 (dd,  $J = 14.0, 5.5$  Hz, 2H), 3.69 (s, 6H), 4.64 (m, 2H), 5.49 (d,  $J = 8.0$  Hz, 2H), 6.95 (dd,  $J = 8.0, 1.5$  Hz, 2H), 7.11 (t,  $J = 8.0$  Hz, 1H), 7.25 (m, 6H), 7.35 (m, 6H), 7.53 (t,  $J = 2.5$  Hz, 1H).

$^{13}\text{C}$  NMR ( $\text{CD}_3\text{CN}$ , 125 MHz),  $\delta$  37.6, 51.7, 54.1, 108.4, 112.2, 126.8, 128.4, 129.1, 129.4, 136.9, 140.2, 154.5, 172.7.

HRMS: Calcd. for  $C_{28}H_{30}N_4O_6Na$   $m/z = 541.2063$ , found  $m/z = 541.2056$

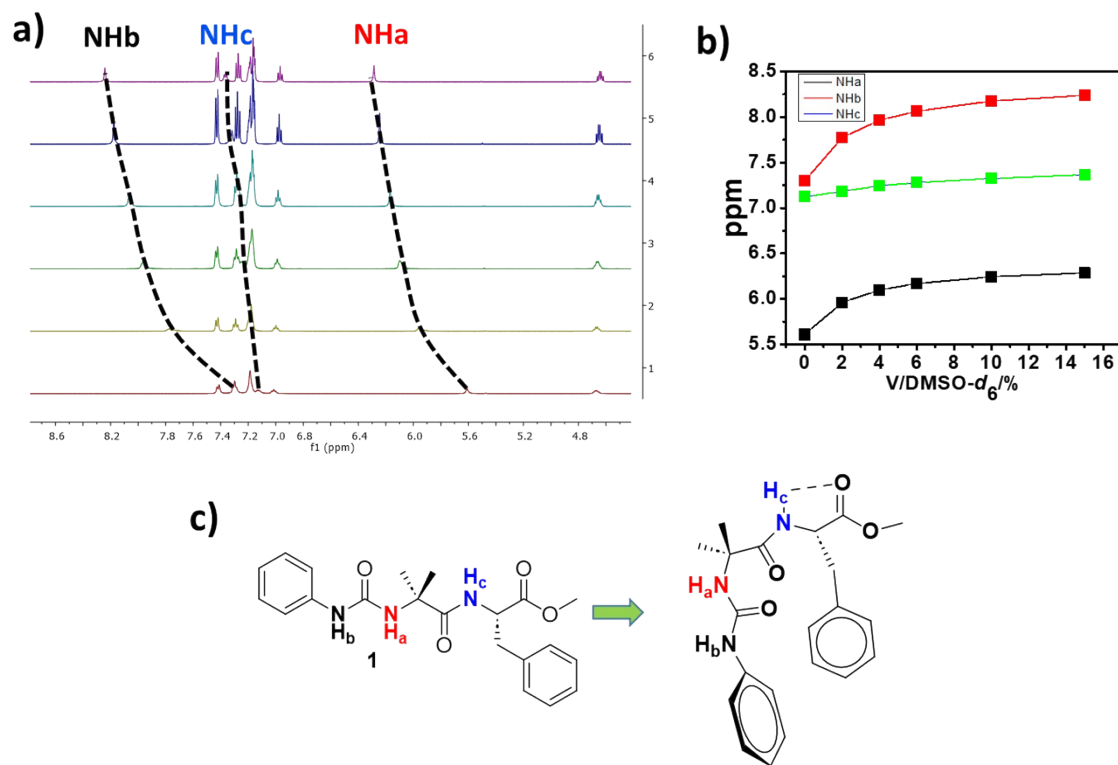

**Figure S1:** a) Partial  $^1\text{H}$  NMR (500 MHz,  $\text{CD}_3\text{CN}$ ) spectra of **1** upon the addition of various amounts of  $\text{DMSO-}d_6$ , b) Influence on NH protons of **1** in  $\text{CD}_3\text{CN}$  by the volume fraction of  $\text{DMSO-}d_6$ , c) Chemical structure of **1** showing  $\beta$ -turn.

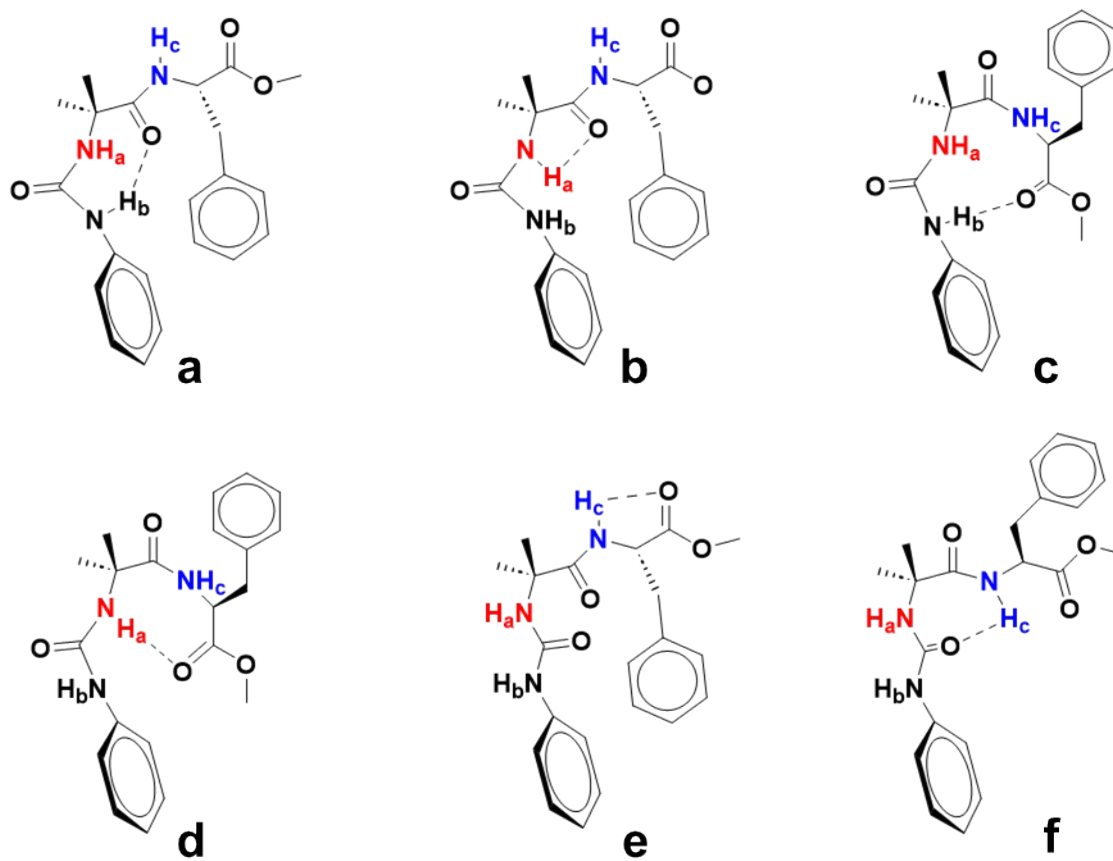

**Figure S2:** Possibilities of CO-NH hydrogen bonds in peptide 1.

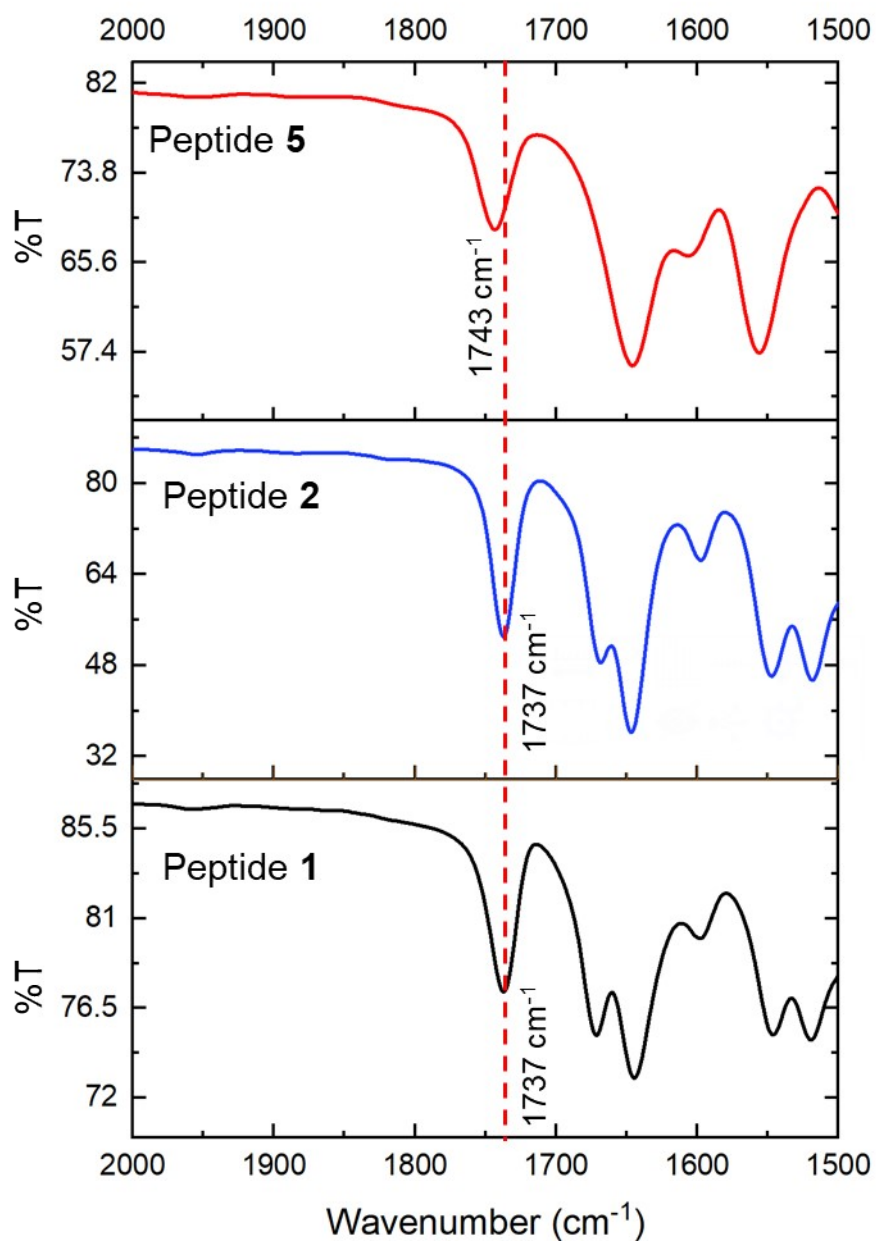

**Figure S3:** The infrared (IR) spectra comparison of peptide **1**, **2** and **5** showing stretching frequency of ester carbonyls in **1** and **2** at  $1737 \text{ cm}^{-1}$ , while that of peptide **5** at  $1743 \text{ cm}^{-1}$ .

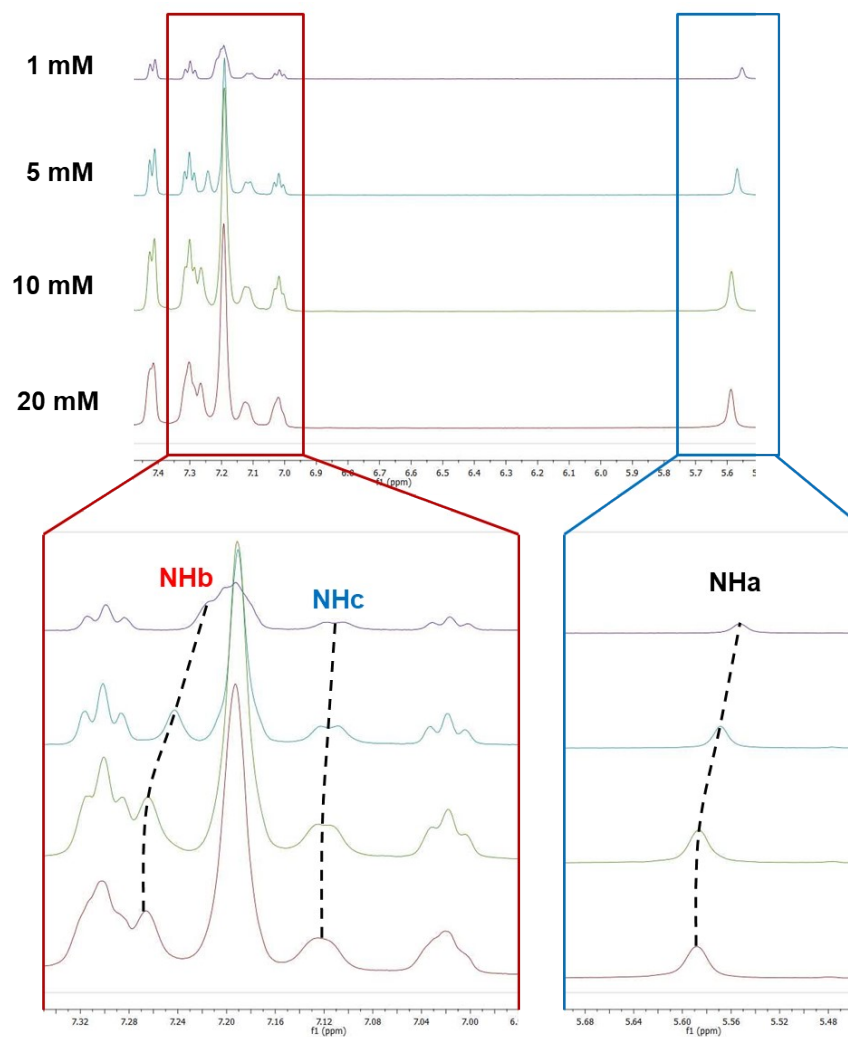

**Figure S4.** Partial <sup>1</sup>H NMR (500 MHz, CD<sub>3</sub>CN) spectra of **1** at different concentrations.

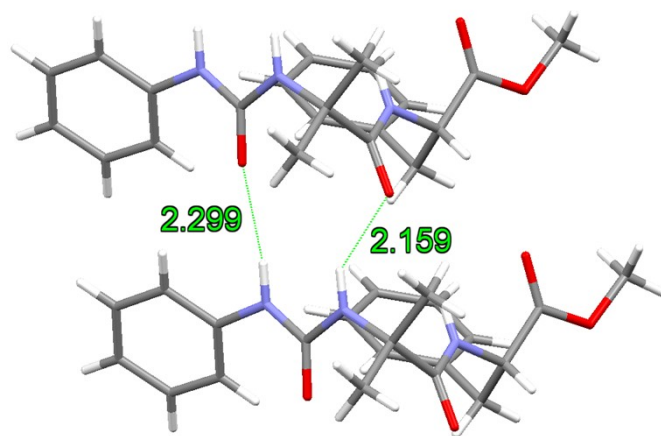

**Figure S5:** Crystal structure of peptide **1** showing N–H···O hydrogen bonds between Aib amide and urea carbonyls with urea NHs. The distances are 2.2 and 2.3 Å respectively.



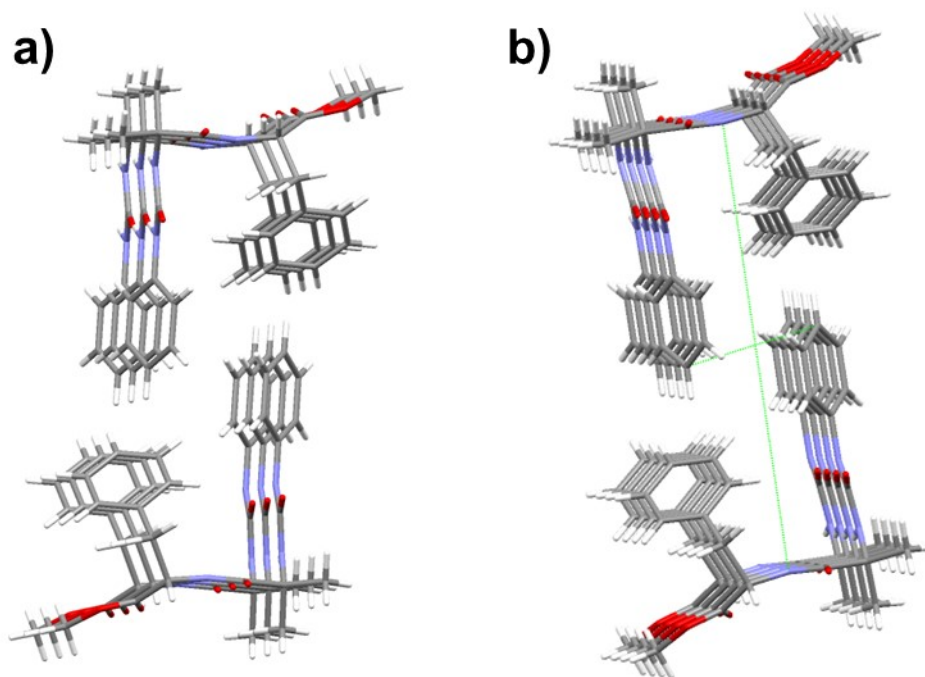

**Figure S6:** a) Association of peptide **1** through intermolecular  $\pi$ - $\pi$  interactions and H-bonding to form the tubular structure, b) Intermolecular hydrogen bonded supramolecular tubular structure of peptide **1**, with dimensions of the cavity are 5 Å and 14 Å.

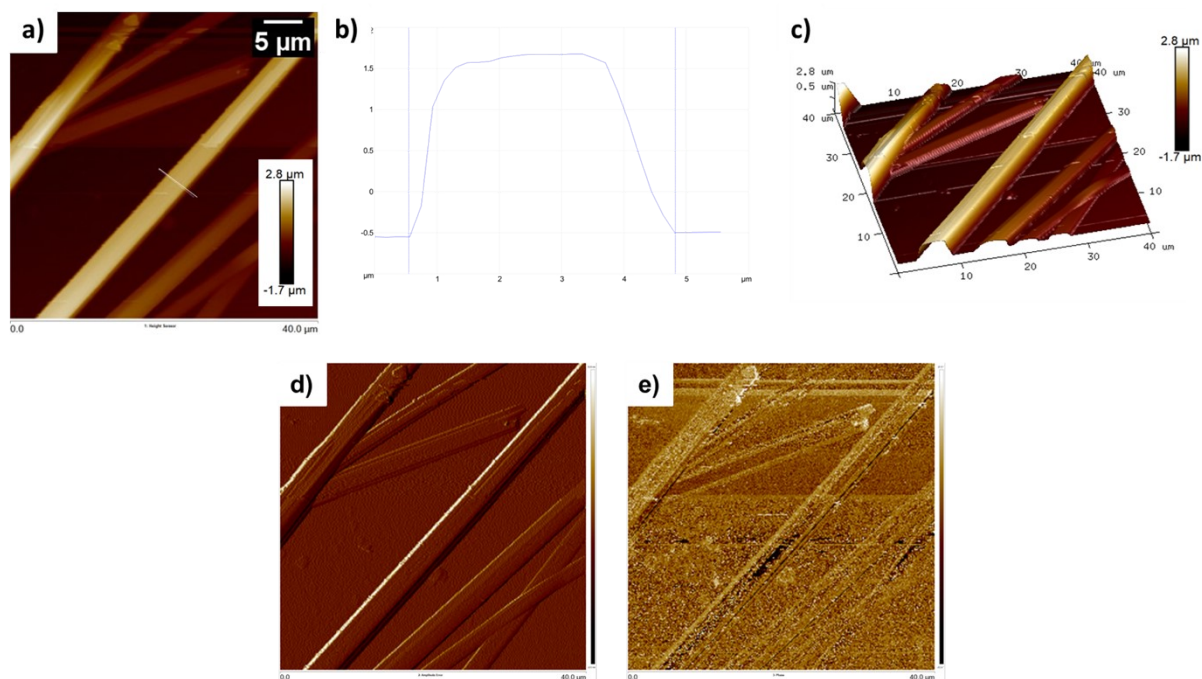

**Figure S7:** a) AFM topographical image of **1** showing microtubular assembly, b) height analysis of a single microtube formed by self-assembly of **1**, c) 3D AFM topographical image of **1**, d) amplitude image and e) phase image of **1** showing tubular assembly.

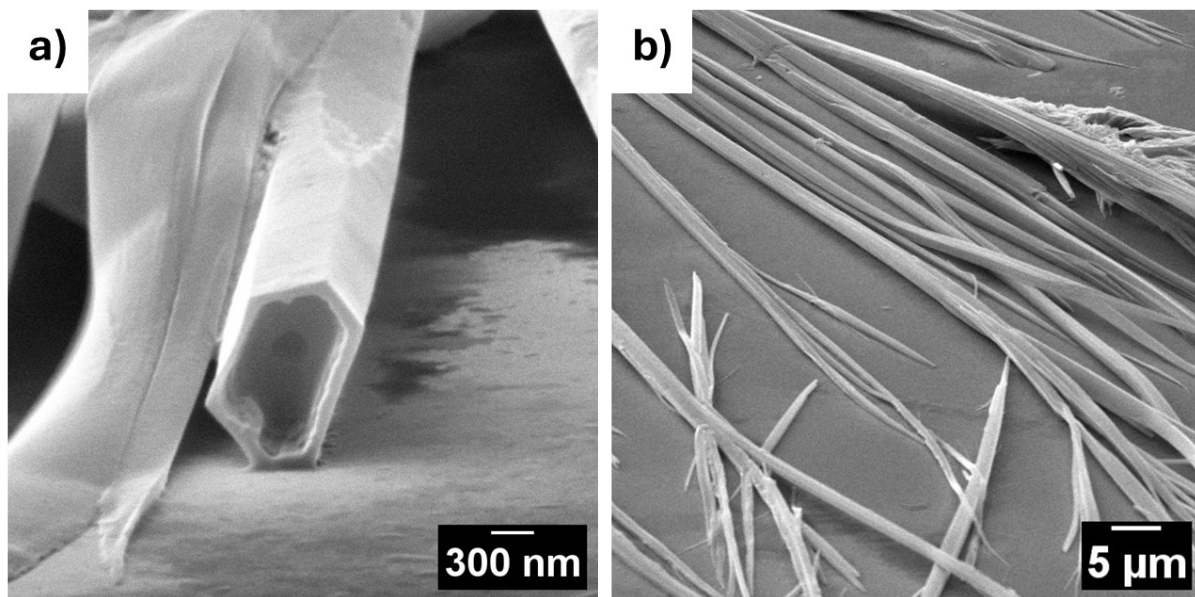

**Figure S8:** a) FESEM images of **2** taken at an angle of  $10^\circ$  from the surface showing the open end of the microtubular assembly.

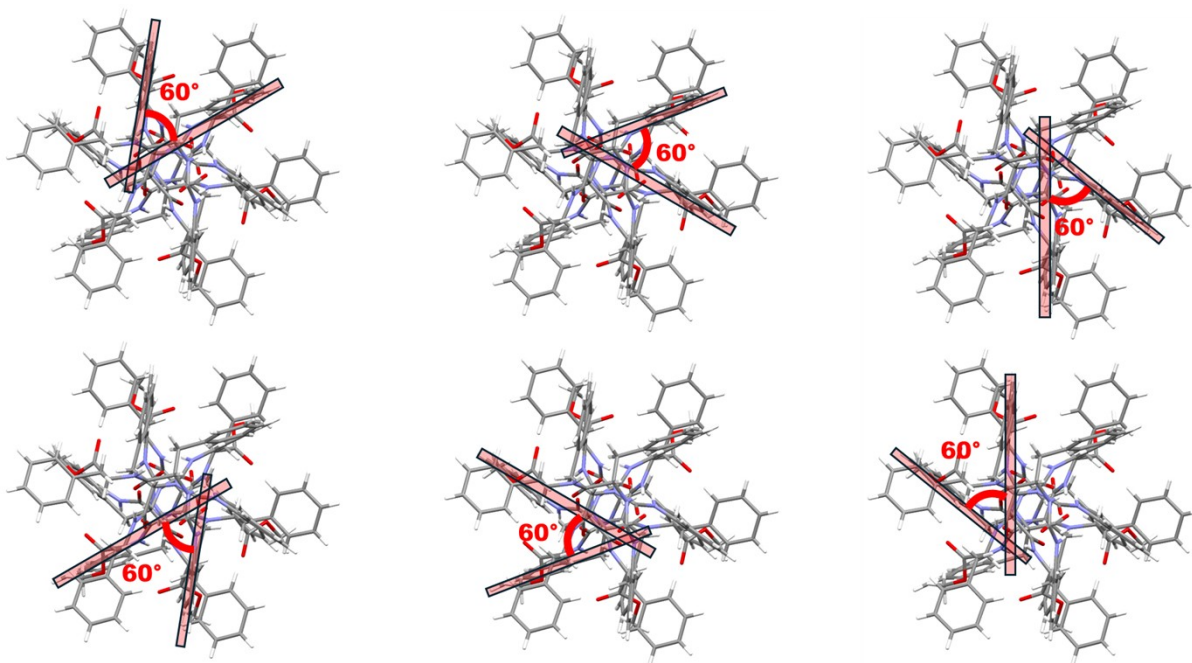

**Figure S9:** The interplanar angle between the aromatic rings of consecutive molecules were found to be 60 °.

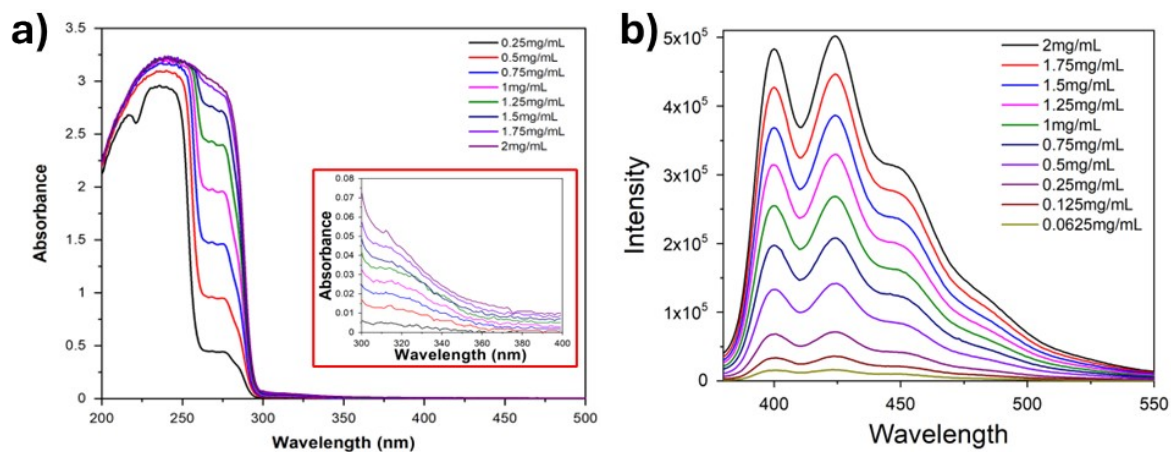

**Figure S10:** a) UV-visible absorption spectra of **1** at different concentrations. The inset shows partial absorption spectra indicating absorption at higher wavelengths, b) Fluorescence emission spectra for different concentrations of **1** upon excitation at 365 nm.

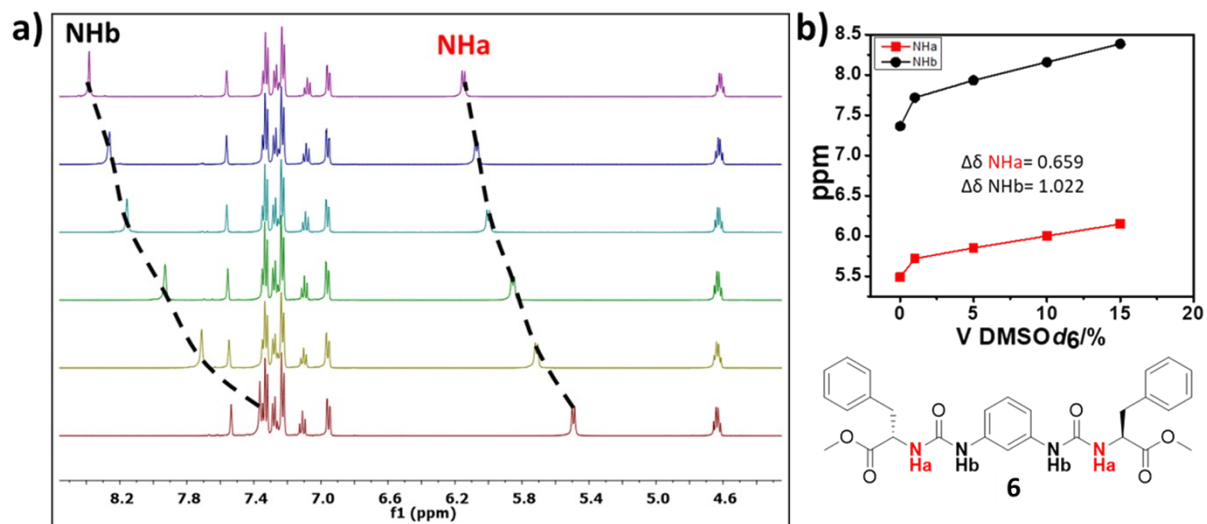

**Figure S11:** Partial  $^1\text{H}$  NMR (500 MHz,  $\text{CD}_3\text{CN}$ ) spectra of **6** upon the addition of various amounts of  $\text{DMSO-}d_6$ .

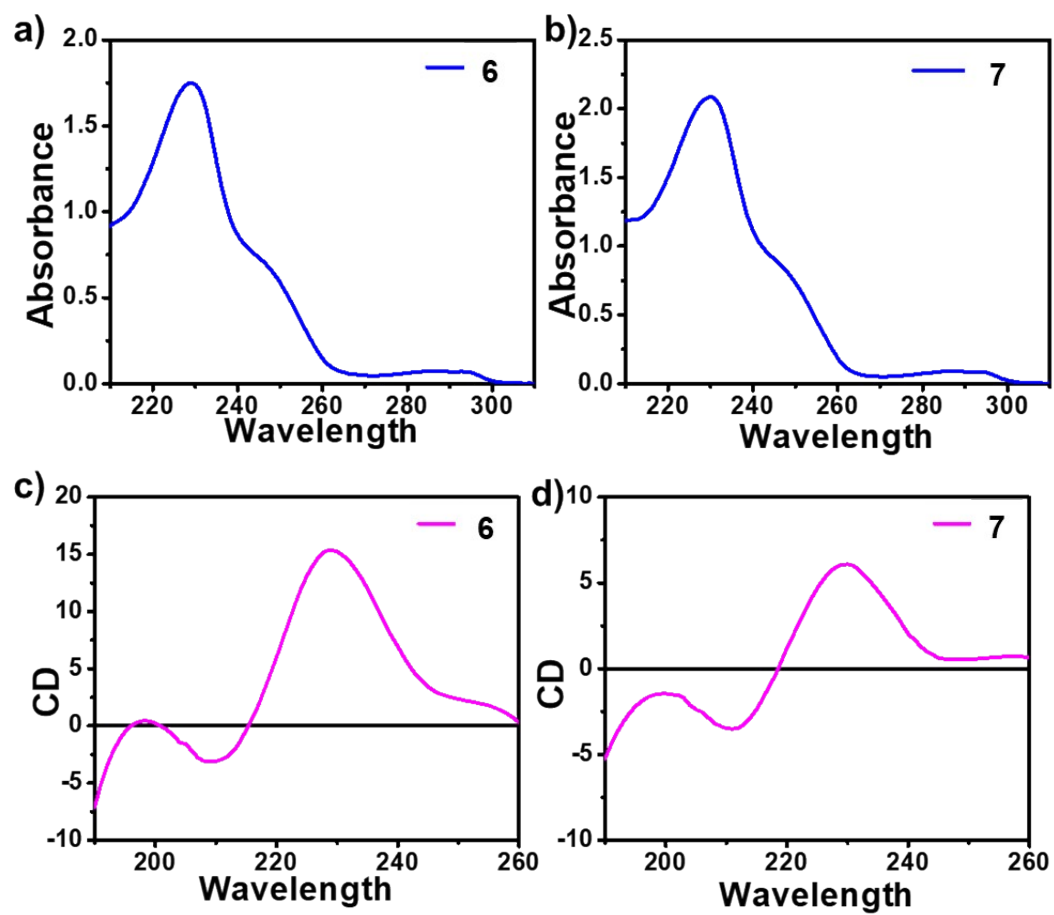

**Figure S12:** UV-vis spectra of a) **6** and b) **7**, and CD spectra of c) **6** and d) **7**.

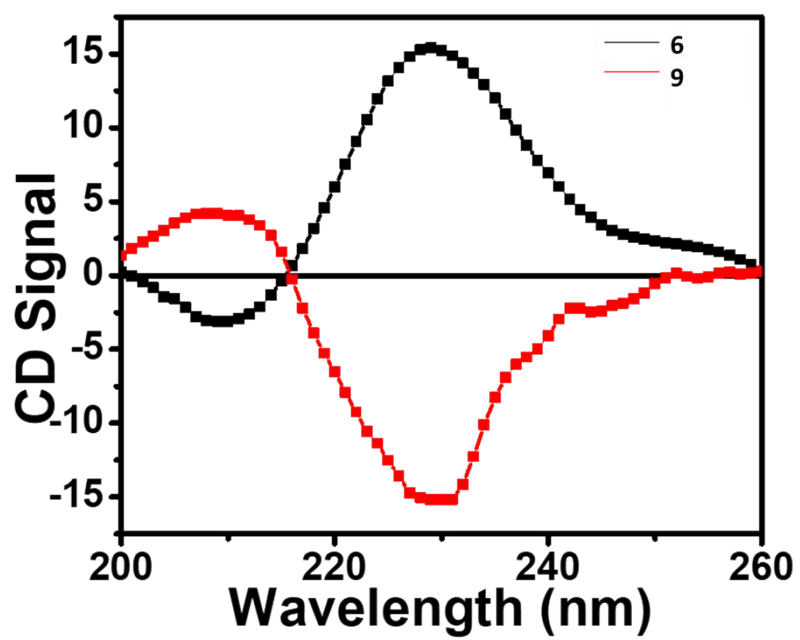

Figure S13: CD spectra of **6** and **9** in acetonitrile.



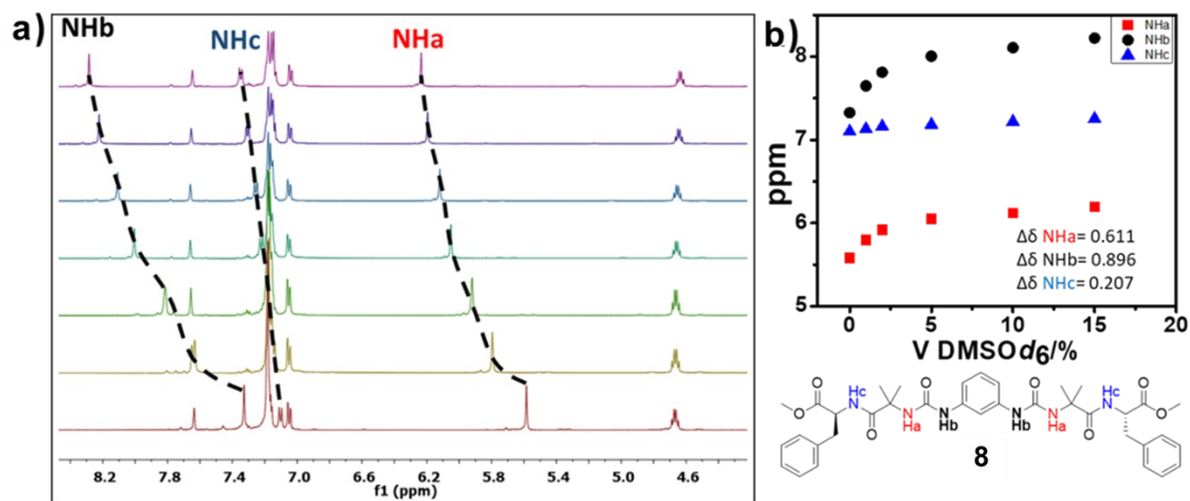

**Figure S14:** a) Partial  $^1\text{H}$  NMR (500 MHz,  $\text{CD}_3\text{CN}$ ) spectra of **8** upon the addition of various amounts of  $\text{DMSO-d}_6$ . b) Change in the chemical shift of NH proton with the addition of  $\text{DMSO-d}_6$ .

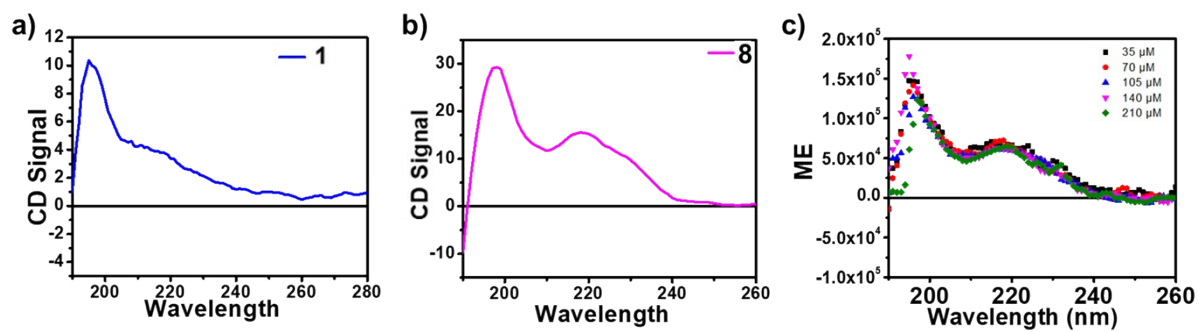

**Figure S15:** CD spectra of a) **1** and b) **8**, c) Concentration-dependent CD spectra of

**8.**

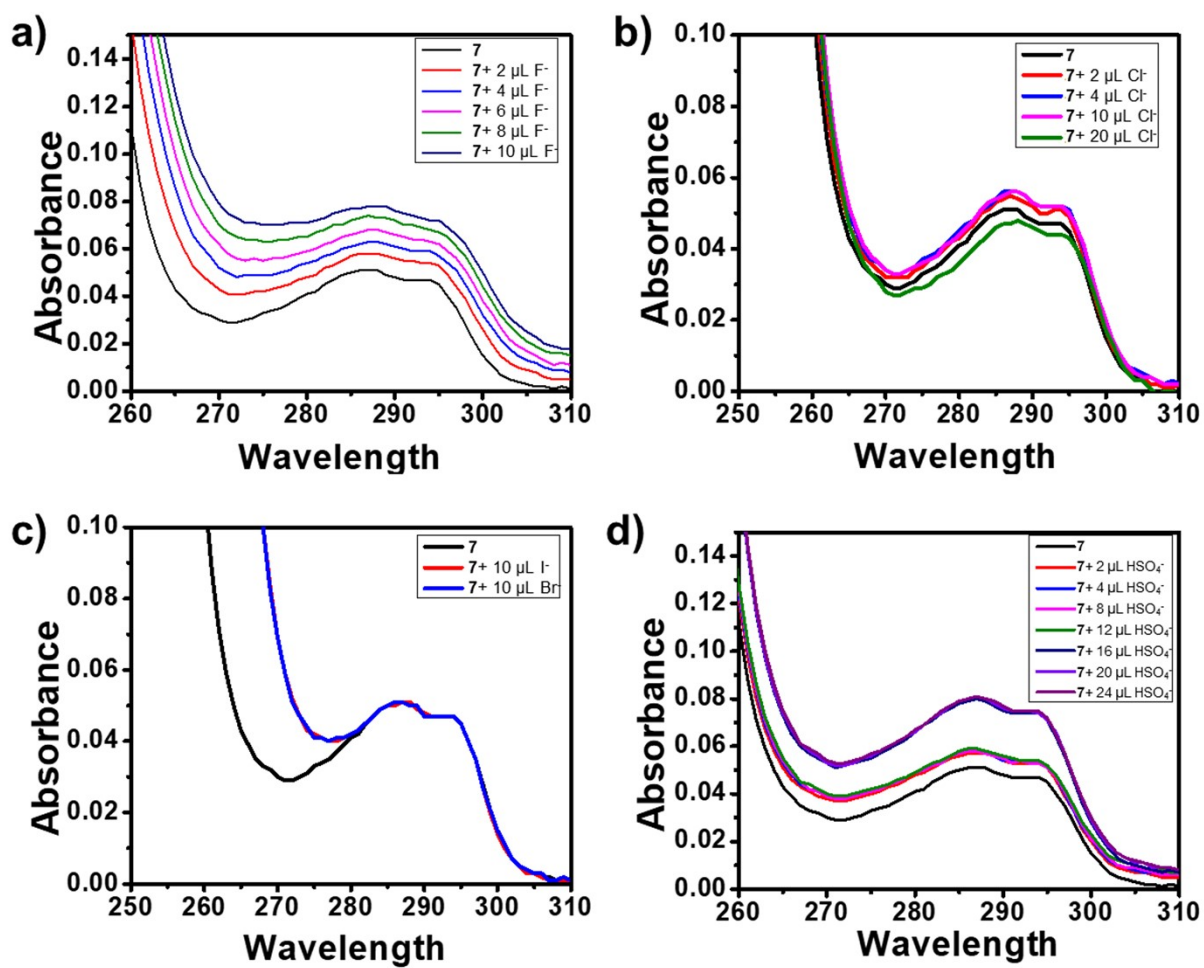

Figure S16: UV-vis spectra of 7 on addition of a) F<sup>-</sup>, b) Cl<sup>-</sup>, c) I<sup>-</sup> and Br<sup>-</sup>, and d) HSO<sub>4</sub><sup>-</sup>.

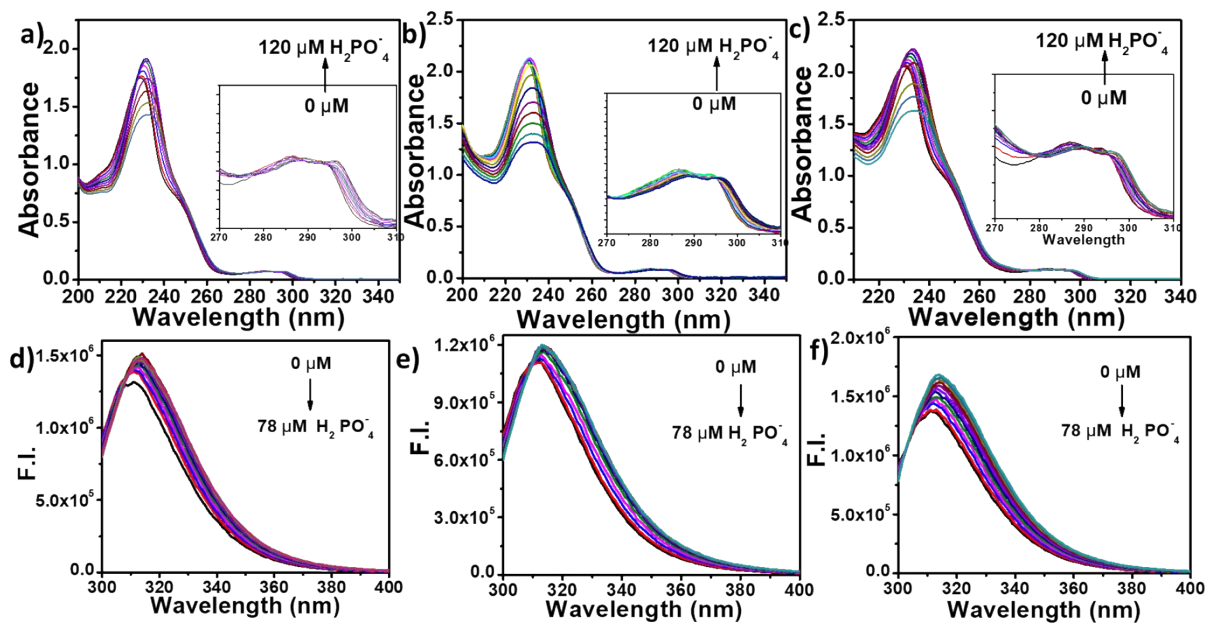

**Figure S17:** UV-vis spectra of a) **6**, b) **7** and c) **8** on addition of  $\text{H}_2\text{PO}_4^-$  (inset showing the band at 270-300 nm) and fluorescence spectra of d) **6**, e) **7** and f) **8** on addition of  $\text{H}_2\text{PO}_4^-$  ( $\lambda_{\text{ex}} = 290 \text{ nm}$ ).

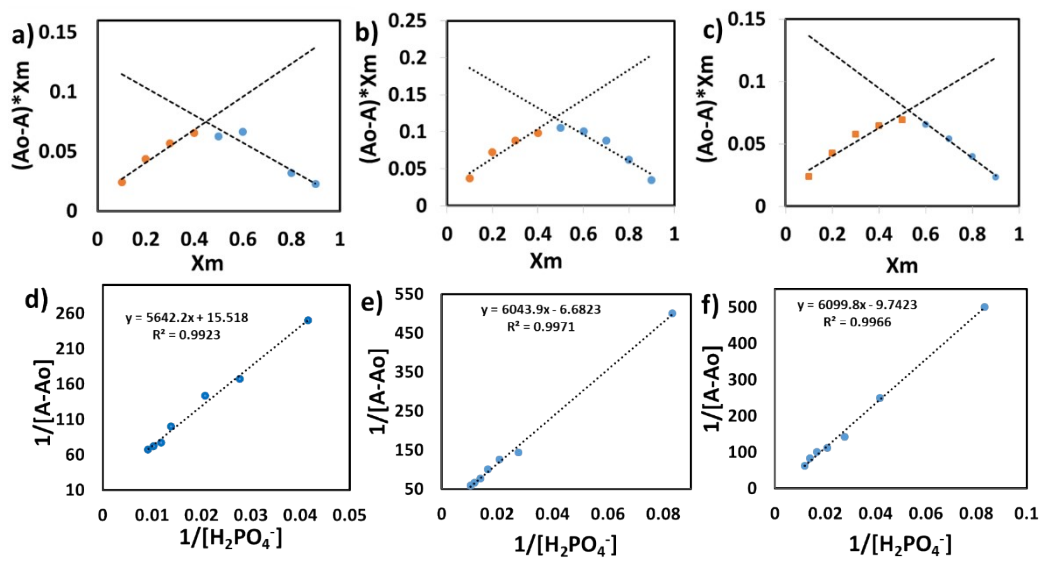

**Figure S18:** Job Plots: a) **6**, b) **7** and c) **8** and BH plot of a) **6**, b) **7** and c) **8** upon addition of  $H_2PO_4^-$ .

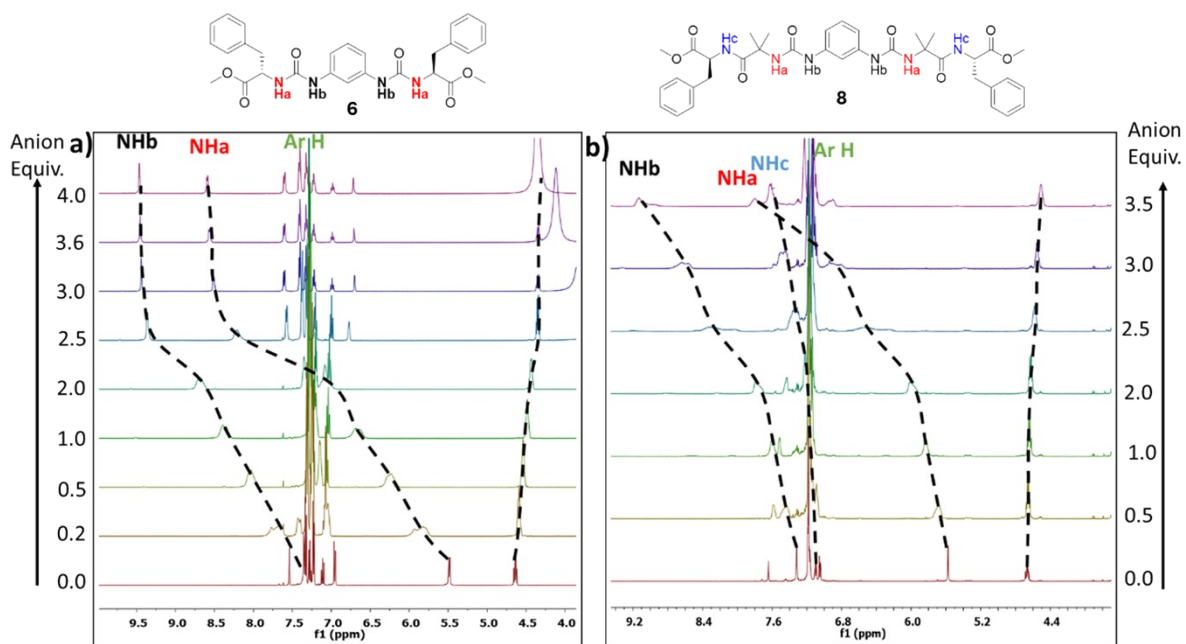

**Figure S19:** Partial  $^1\text{H}$  NMR (500 MHz,  $\text{CD}_3\text{CN}$ ) spectra of a) **6** and b) **8** at increasing concentration of  $\text{H}_2\text{PO}_4^-$  ions.

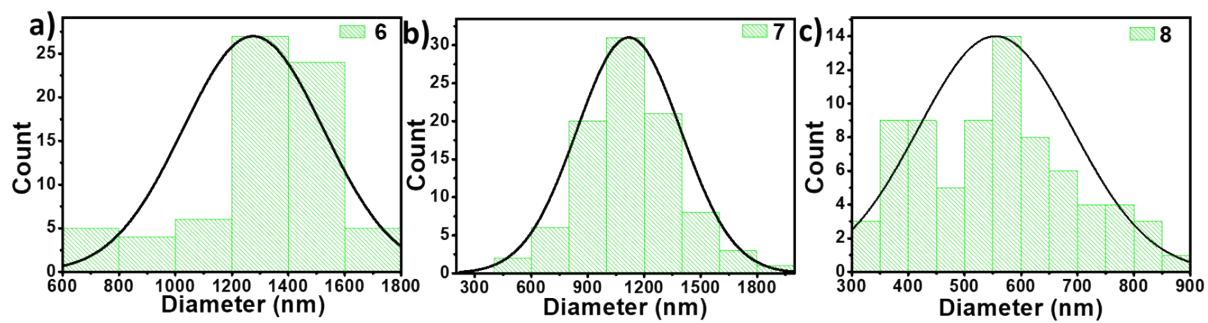

**Figure S20:** Histograms are based on SEM images. Diameters of vesicles obtained from a) **6**, b) **7** and c) **8**.

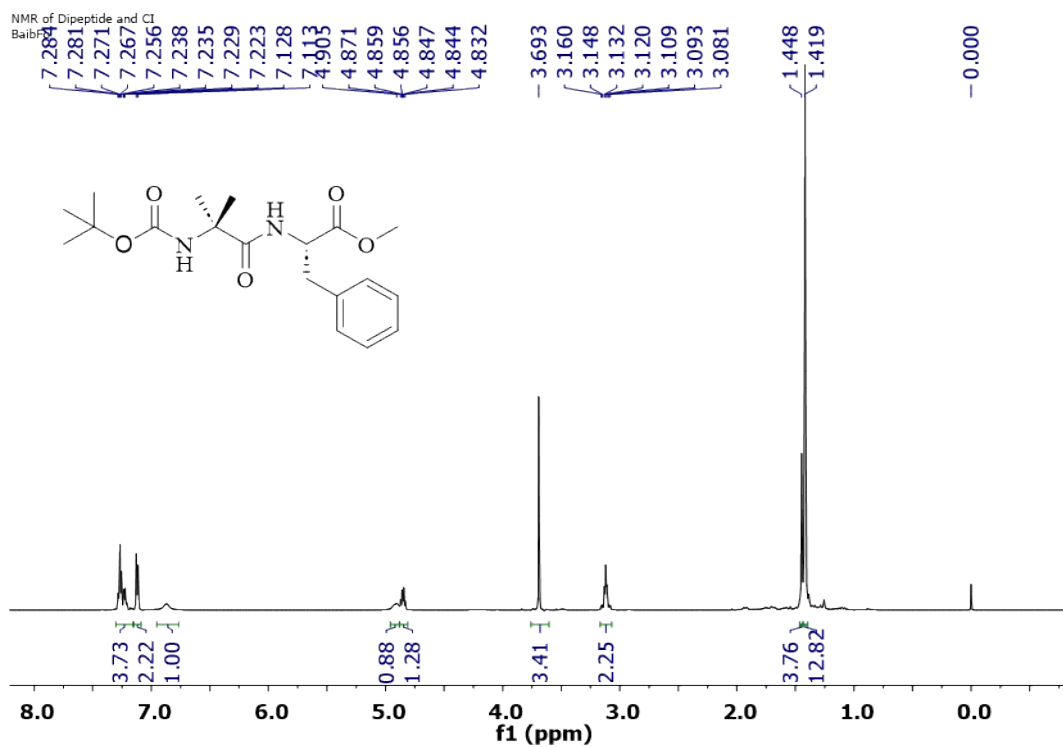

Figure S21:  $^1\text{H}$  NMR (500 MHz,  $\text{CDCl}_3$ ) spectrum of A1.



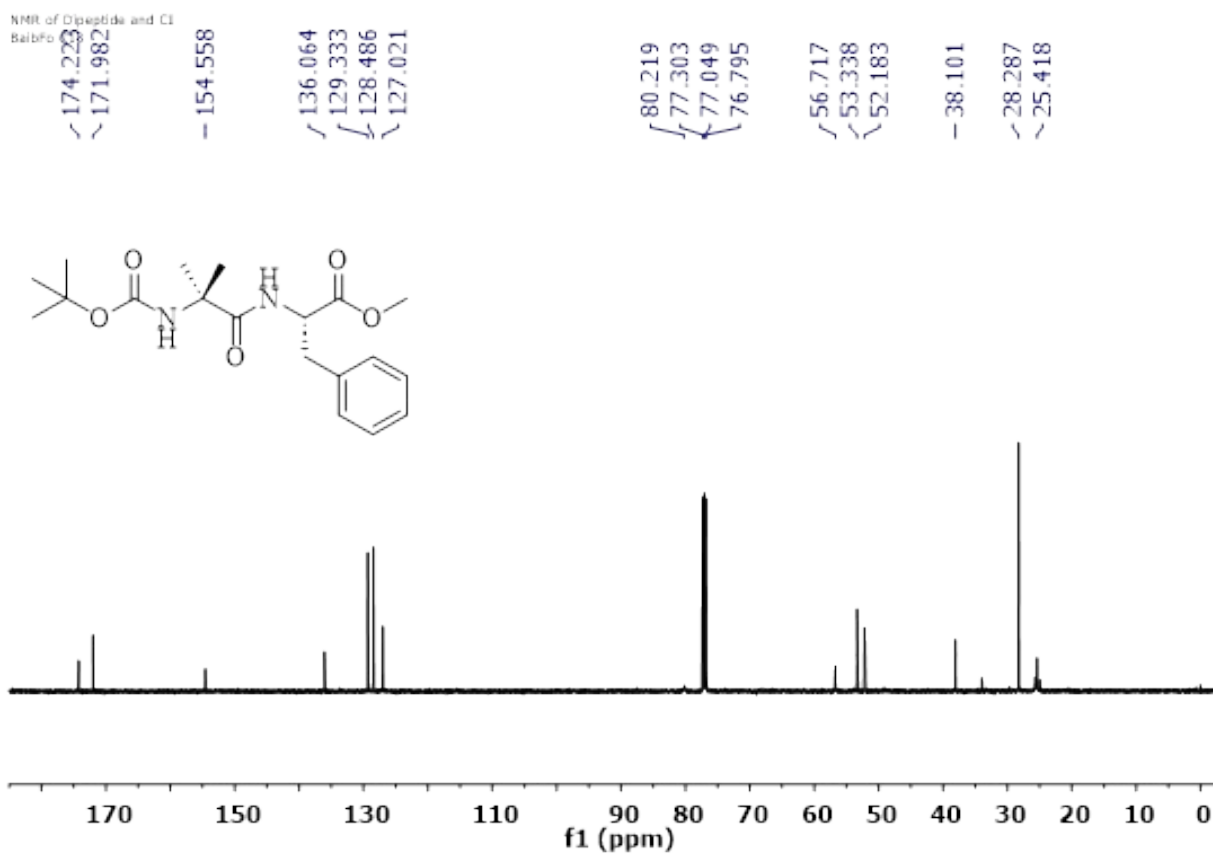

**Figure S22:**  $^{13}\text{C}$  NMR (125 MHz,  $\text{CDCl}_3$ ) spectrum of **A1**.

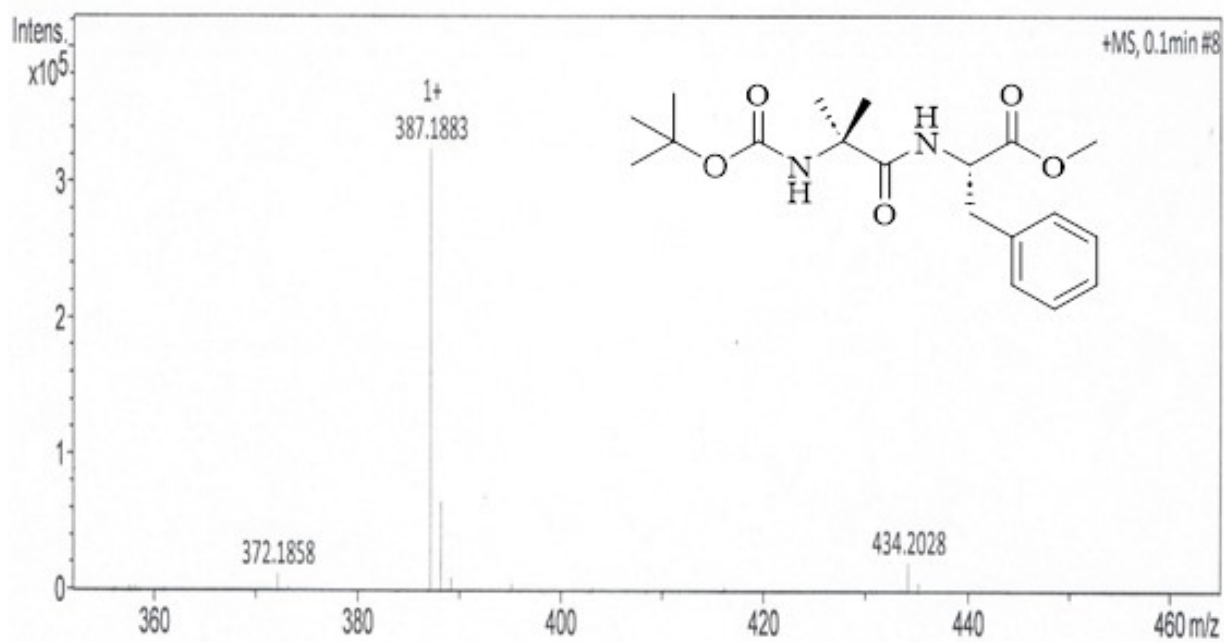

**Figure S23:** ESI-Mass spectrum of **A1**.

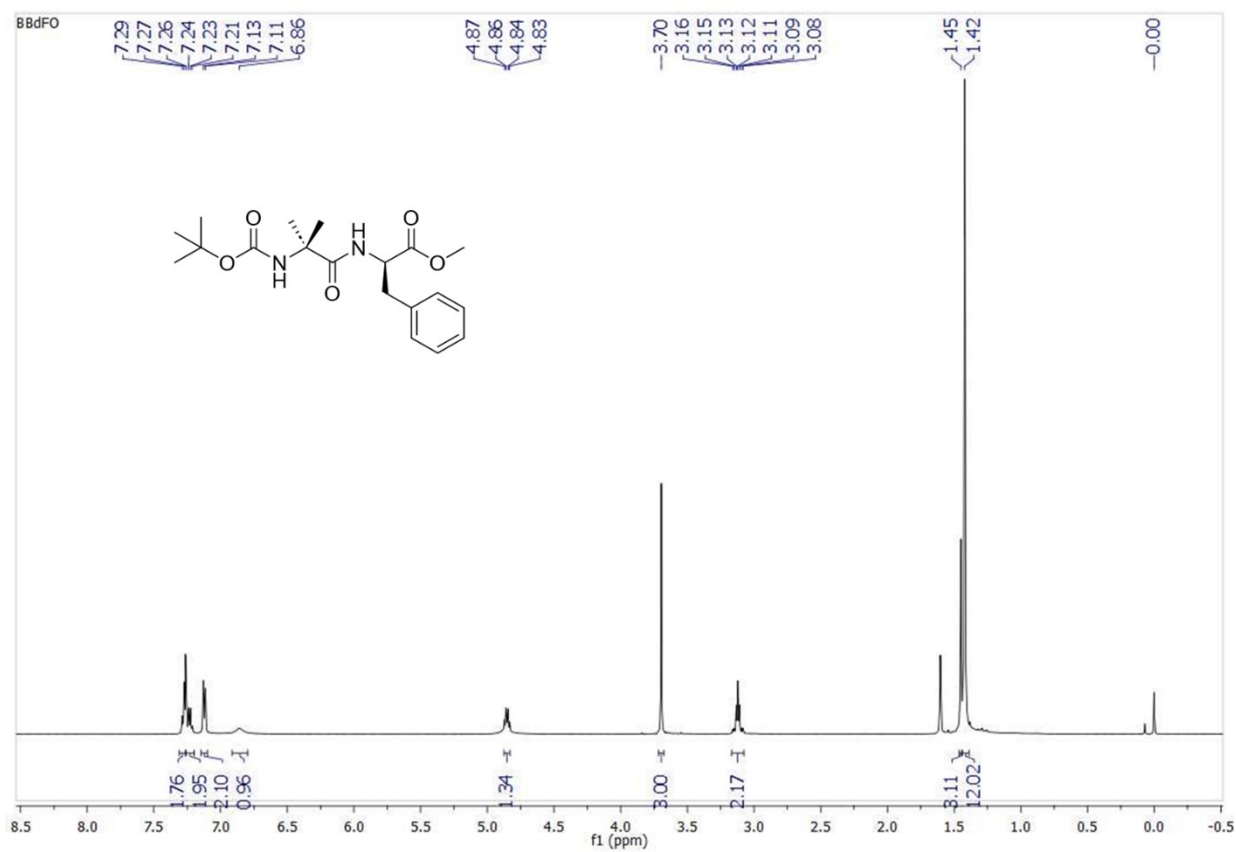

Figure S24:  $^1\text{H}$  NMR (500 MHz,  $\text{CDCl}_3$ ) of A2.

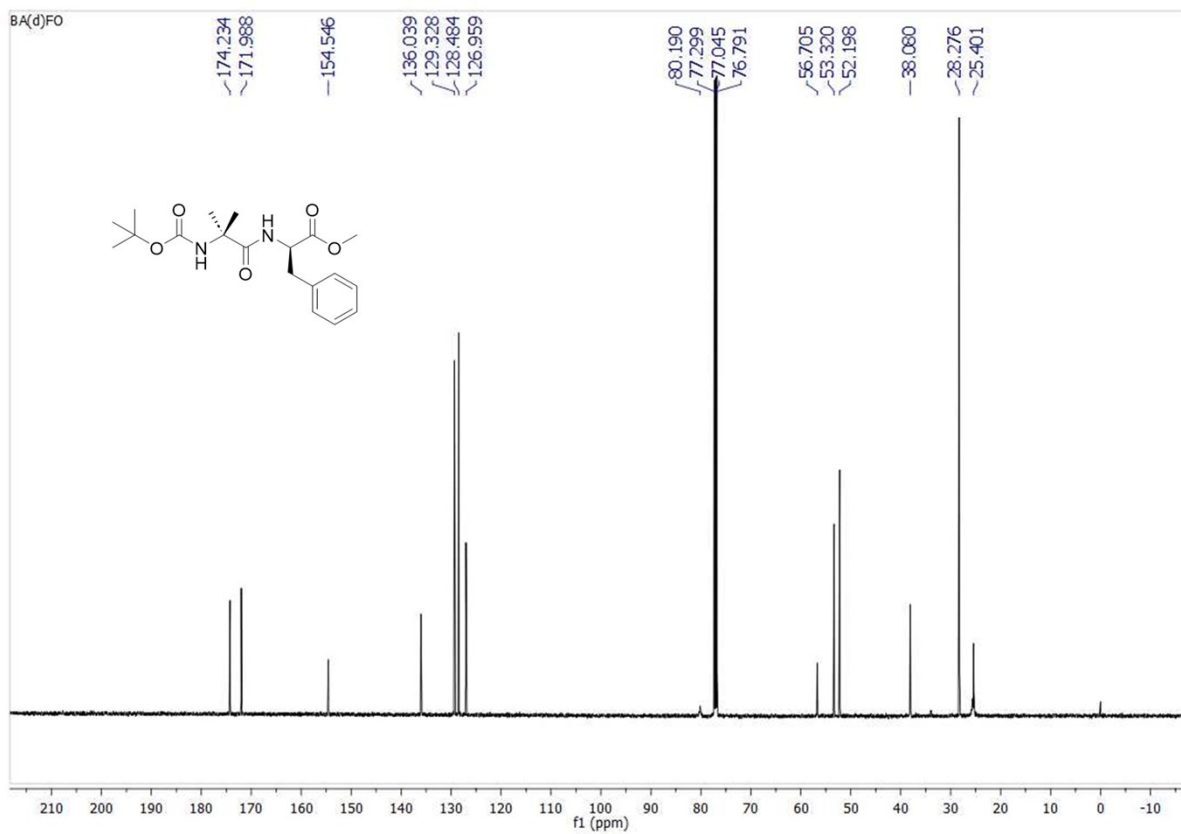

**Figure S25:**  $^{13}\text{C}$  NMR (125 MHz,  $\text{CDCl}_3$ ) spectrum of **A2**.

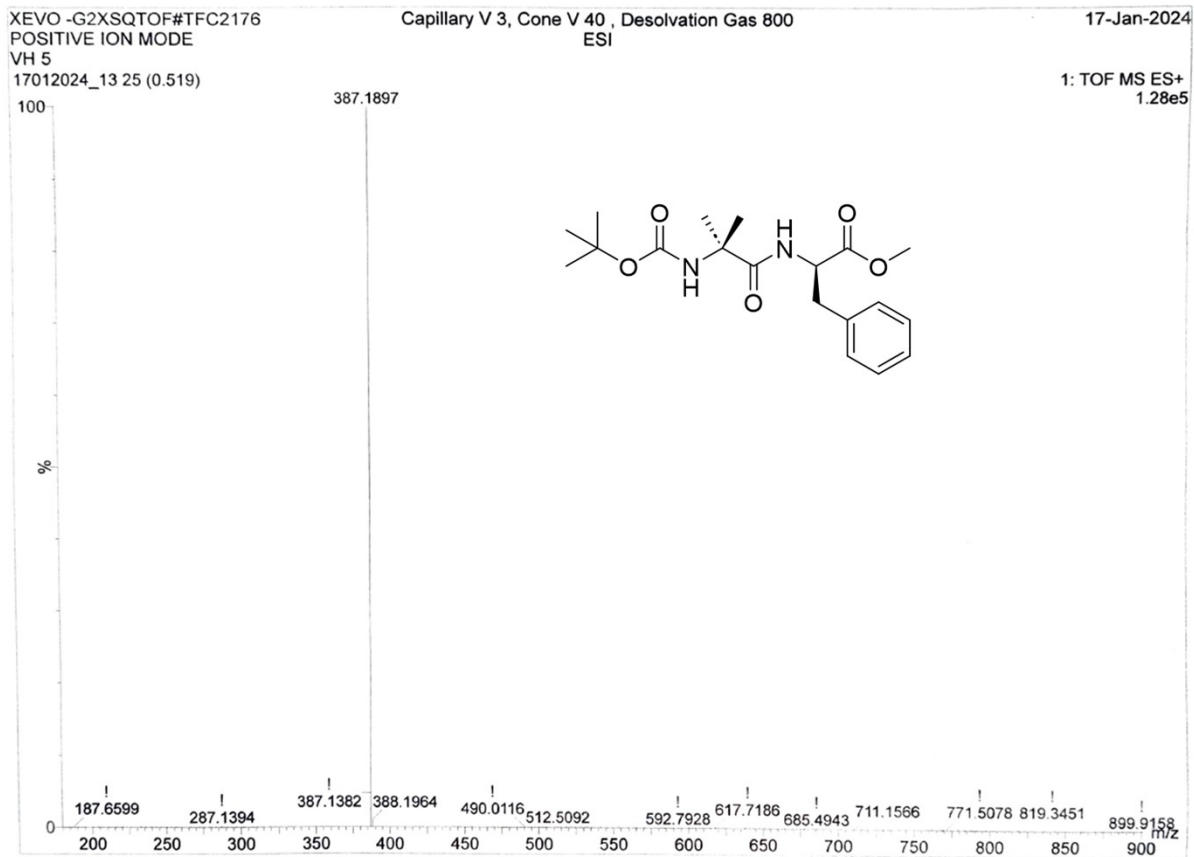

Figure S26: ESI-Mass spectrum of A2.

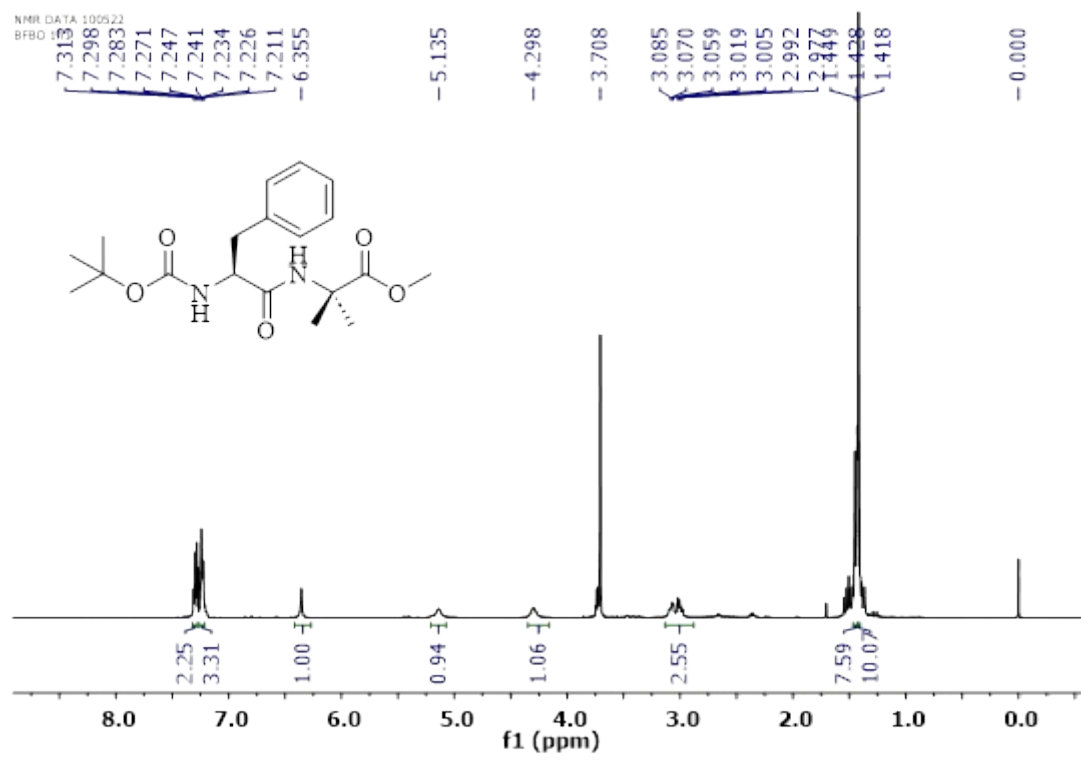

**Figure S27:**  $^1\text{H}$  NMR (500 MHz,  $\text{CDCl}_3$ ) spectrum of **A3**.

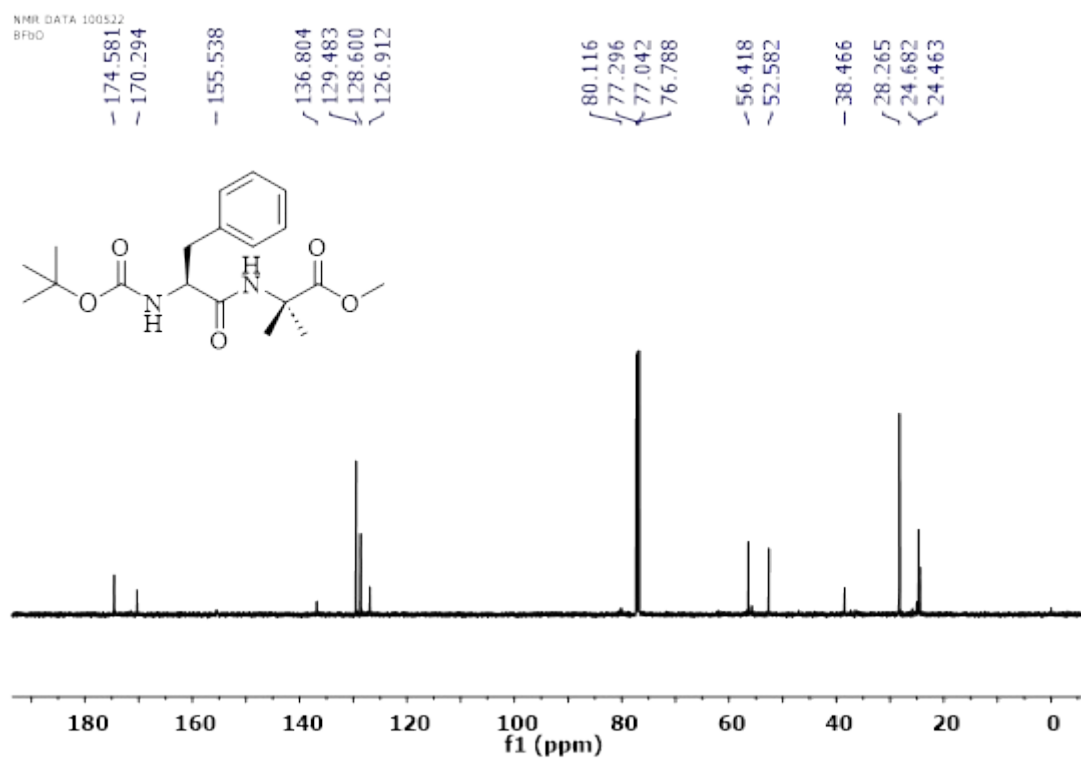

**Figure S28:** <sup>13</sup>C NMR (125 MHz, CDCl<sub>3</sub>) spectrum of **A3**.

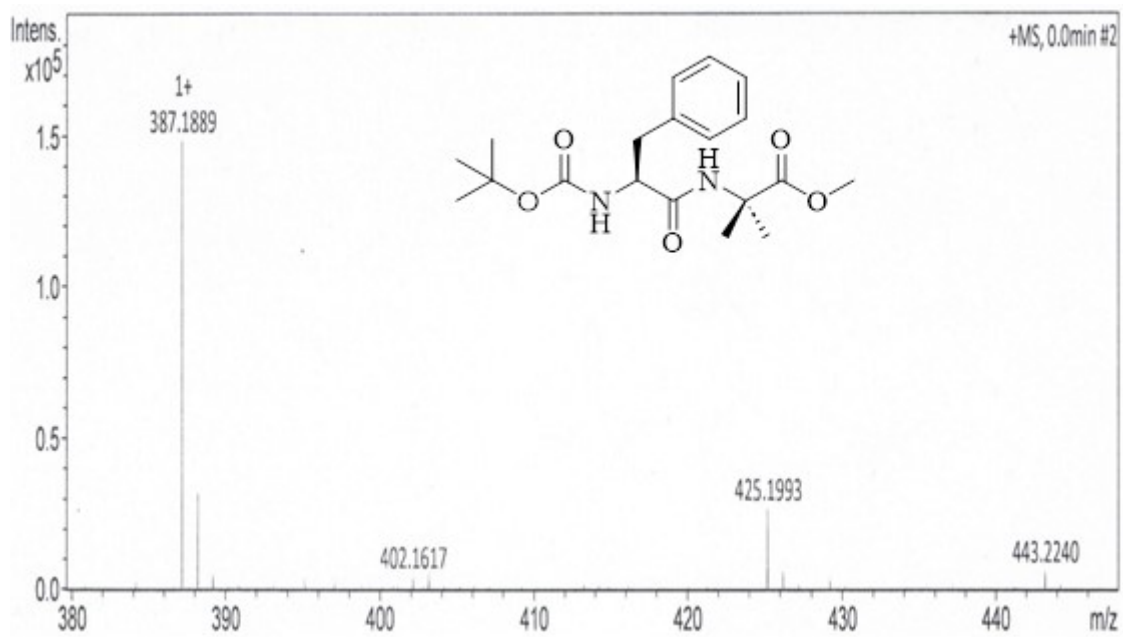

**Figure S29:** ESI-Mass spectrum of **A3**.



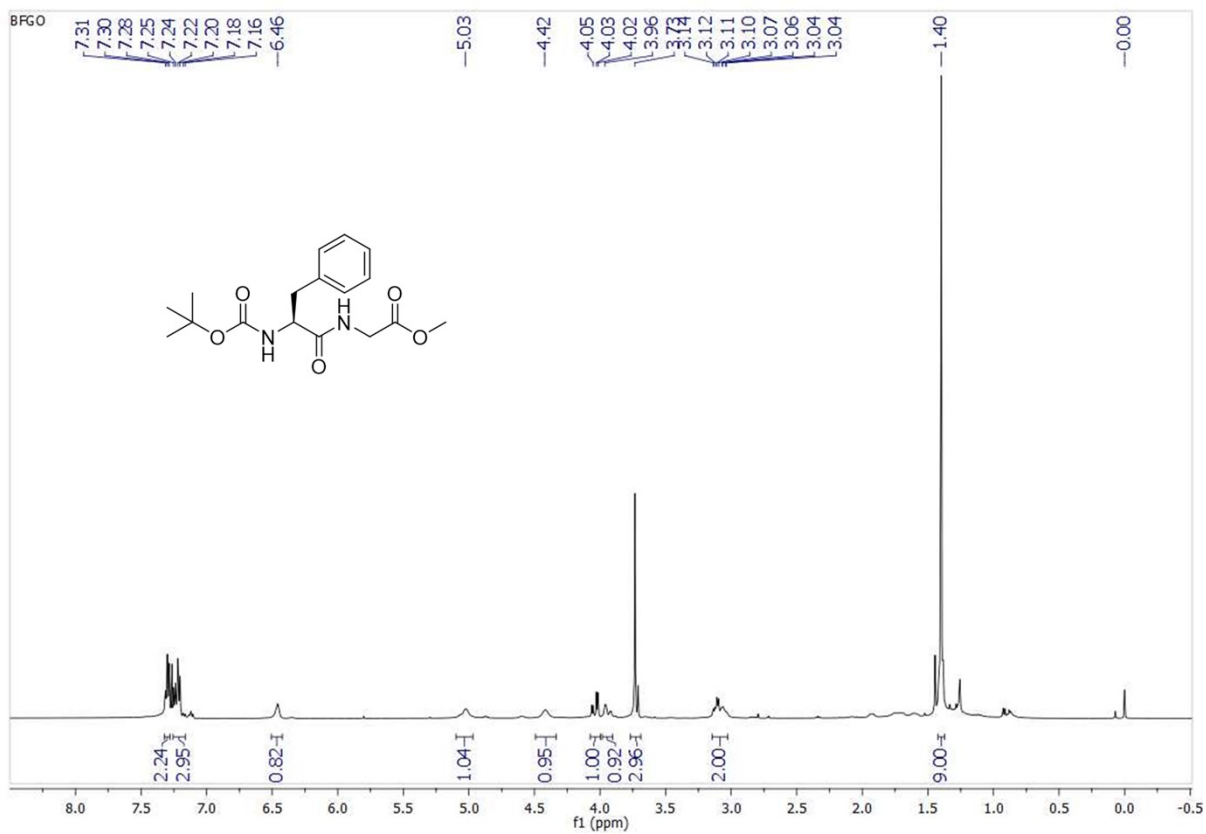

**Figure S30:**  $^1\text{H}$  NMR (500 MHz,  $\text{CDCl}_3$ ) spectrum of **A4**.

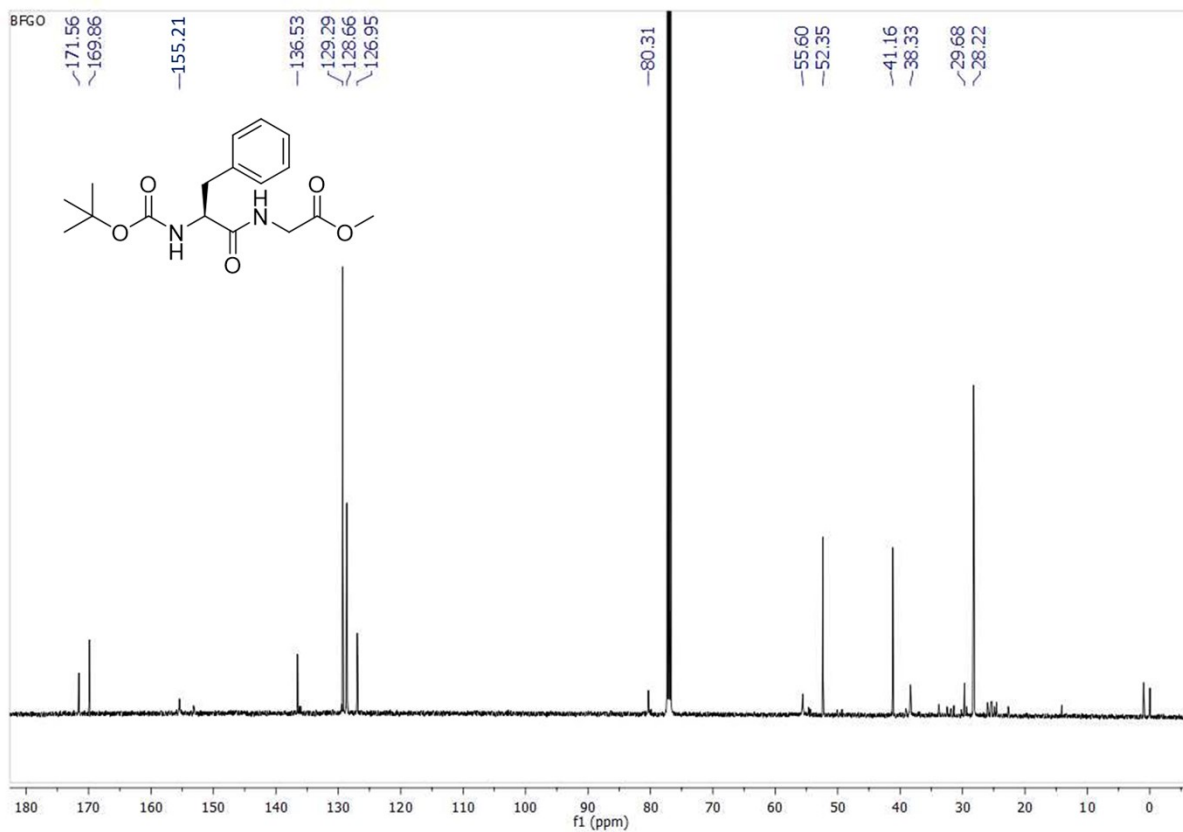

**Figure S31:**  $^{13}\text{C}$  NMR (125 MHz,  $\text{CDCl}_3$ ) spectrum of **A4**.

XEVO -G2XSQTOF#TFC2176  
POSITIVE ION MODE  
VH BFGO  
07032024\_6 29 (0.586)

Capillary V 3, Cone V 40, Desolvation Gas 800  
ESI

07-Mar-2024

1: TOF MS ES+  
1.49e6

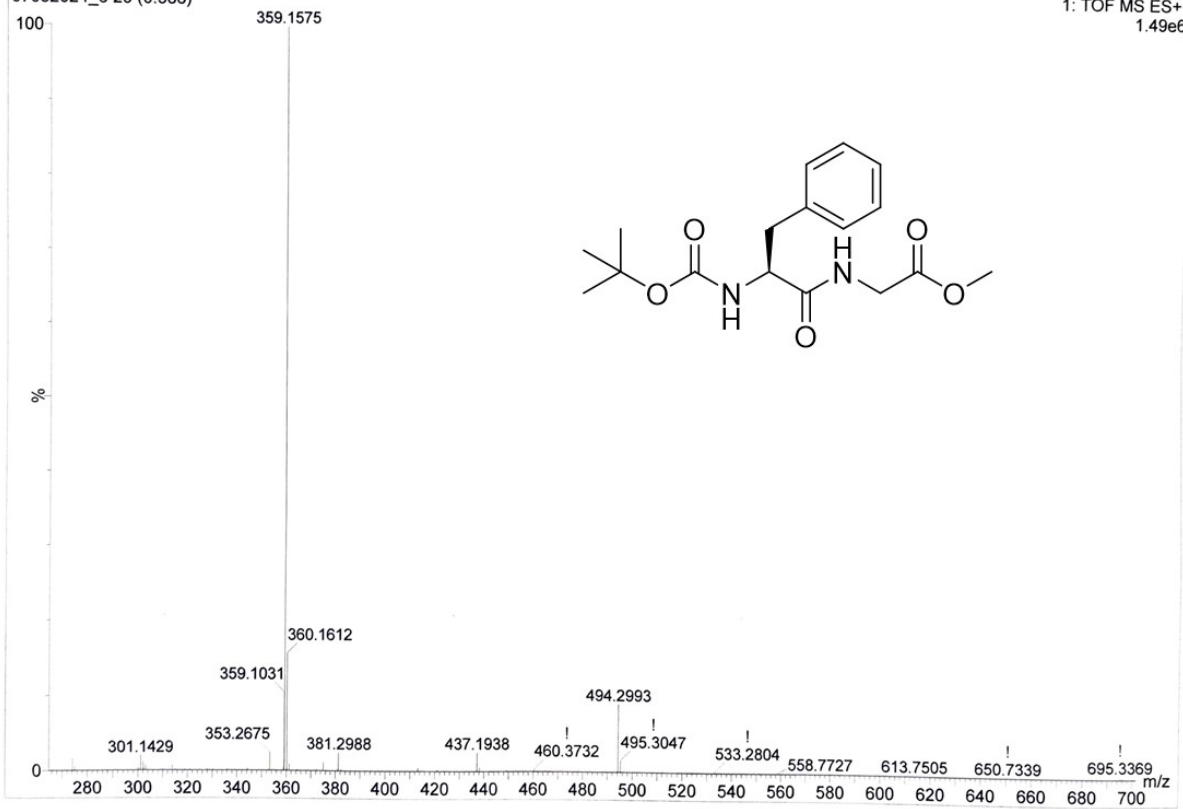

**Figure S32:** ESI-Mass spectrum of **A4**.

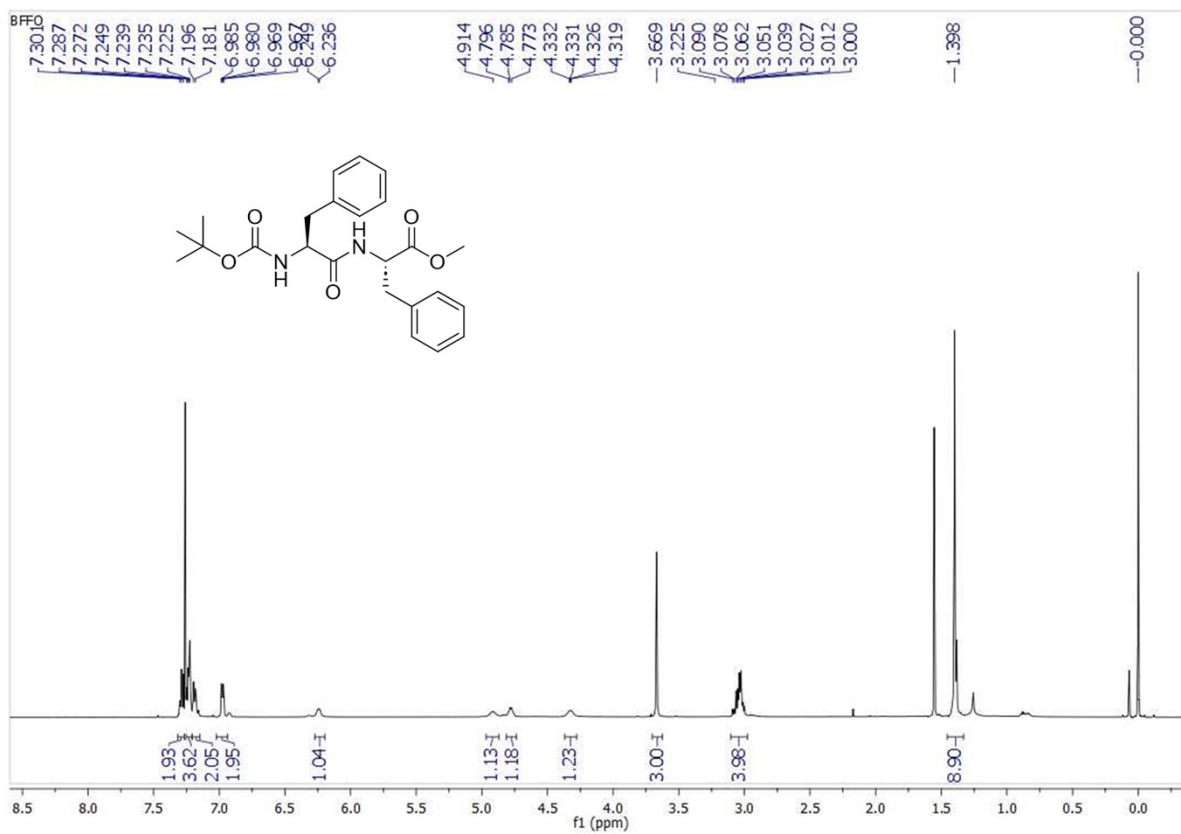

**Figure S33:**  $^1\text{H}$  NMR (500 MHz,  $\text{CDCl}_3$ ) spectrum of **A5**.

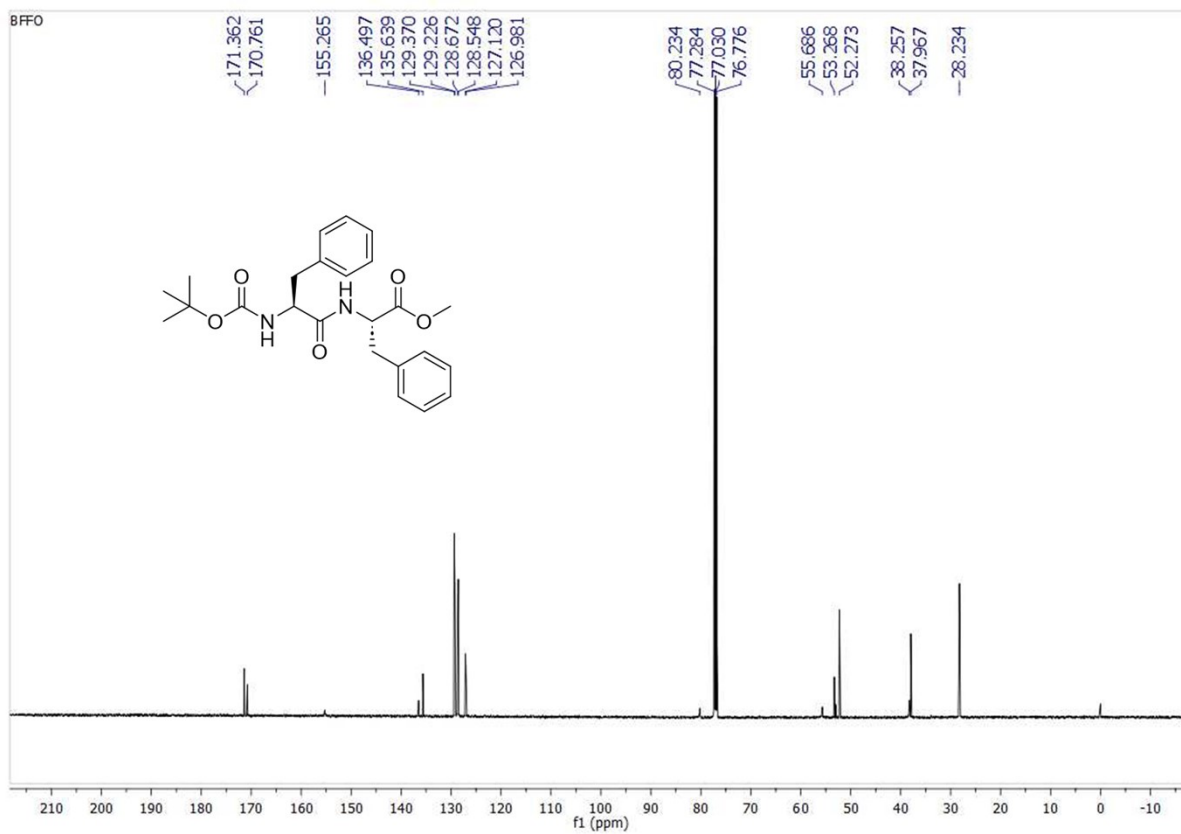

**Figure S34:**  $^{13}\text{C}$  NMR (125 MHz,  $\text{CDCl}_3$ ) spectrum of **A5**.

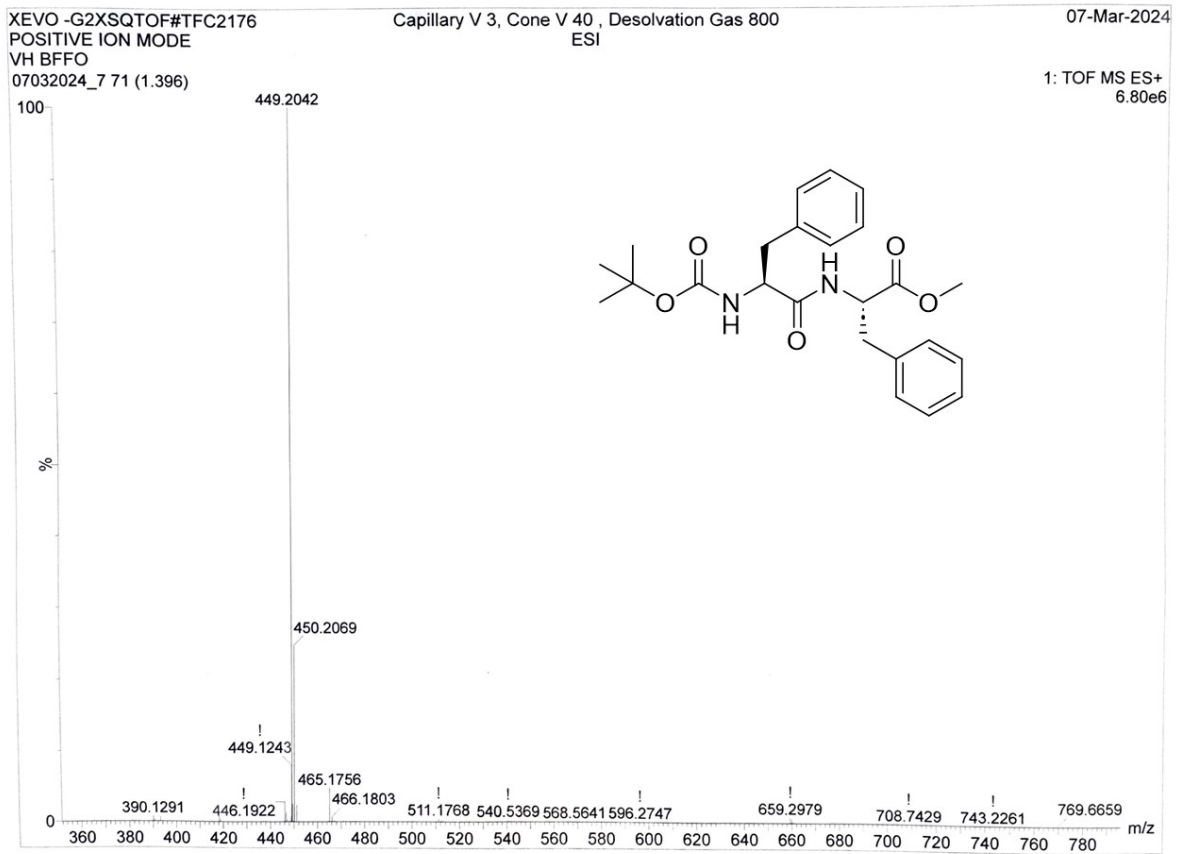

Figure S35: ESI-Mass spectrum of A5.

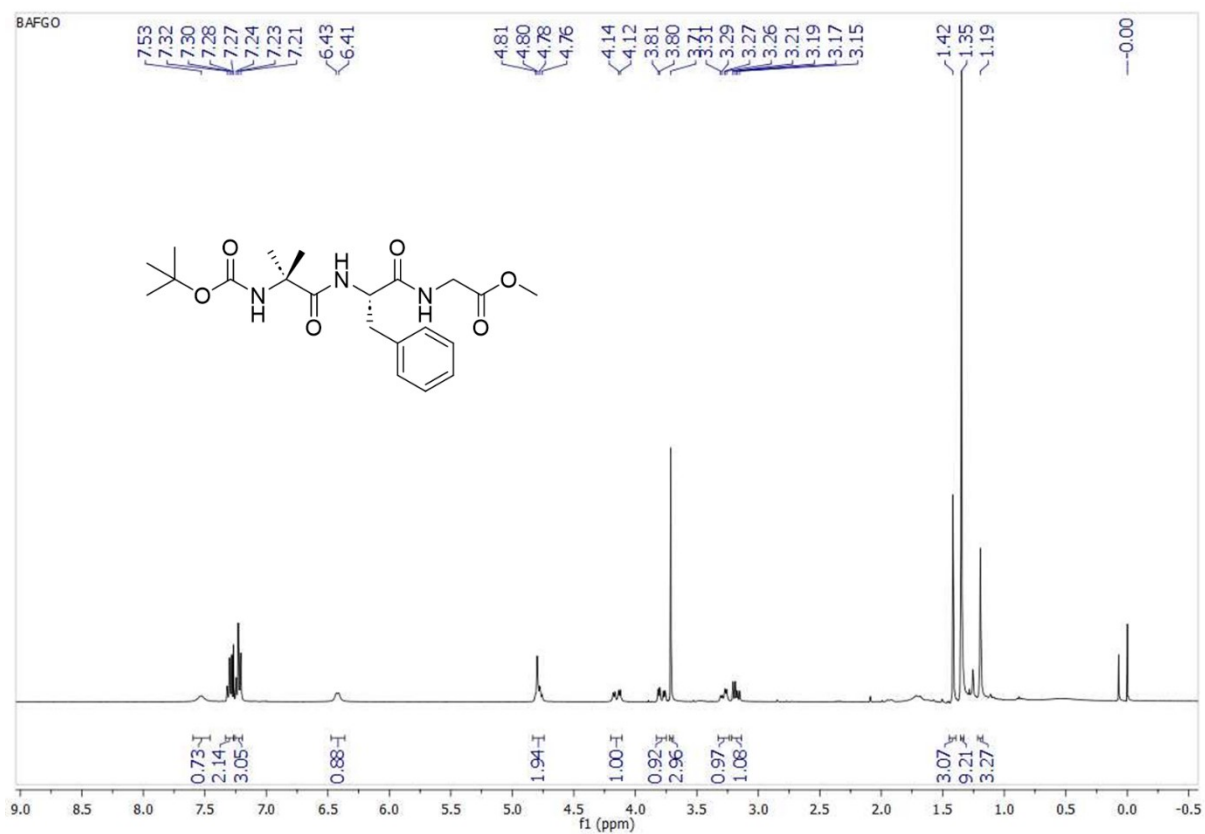

**Figure S36:**  $^1\text{H}$  NMR (500 MHz,  $\text{CDCl}_3$ ) spectrum of **A6**.

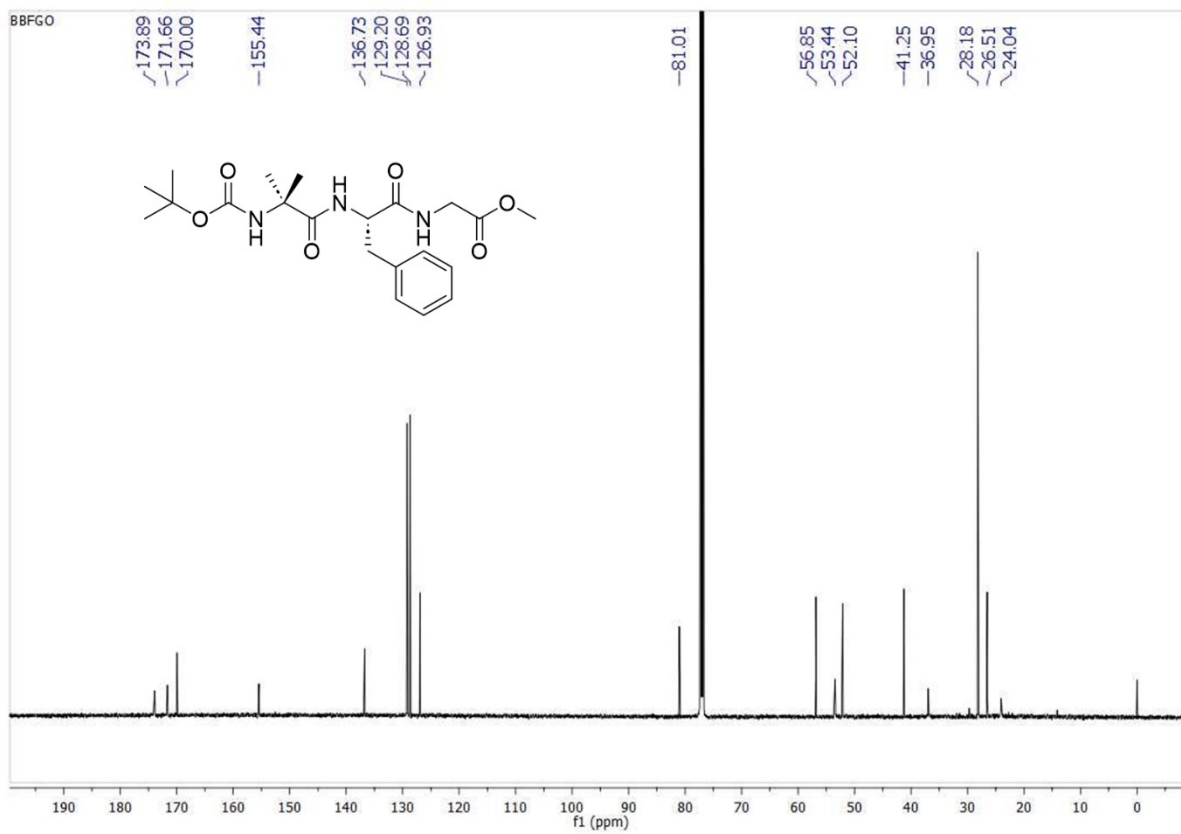

Figure S37:  $^{13}\text{C}$  NMR (125 MHz,  $\text{CDCl}_3$ ) spectrum of **A6**.



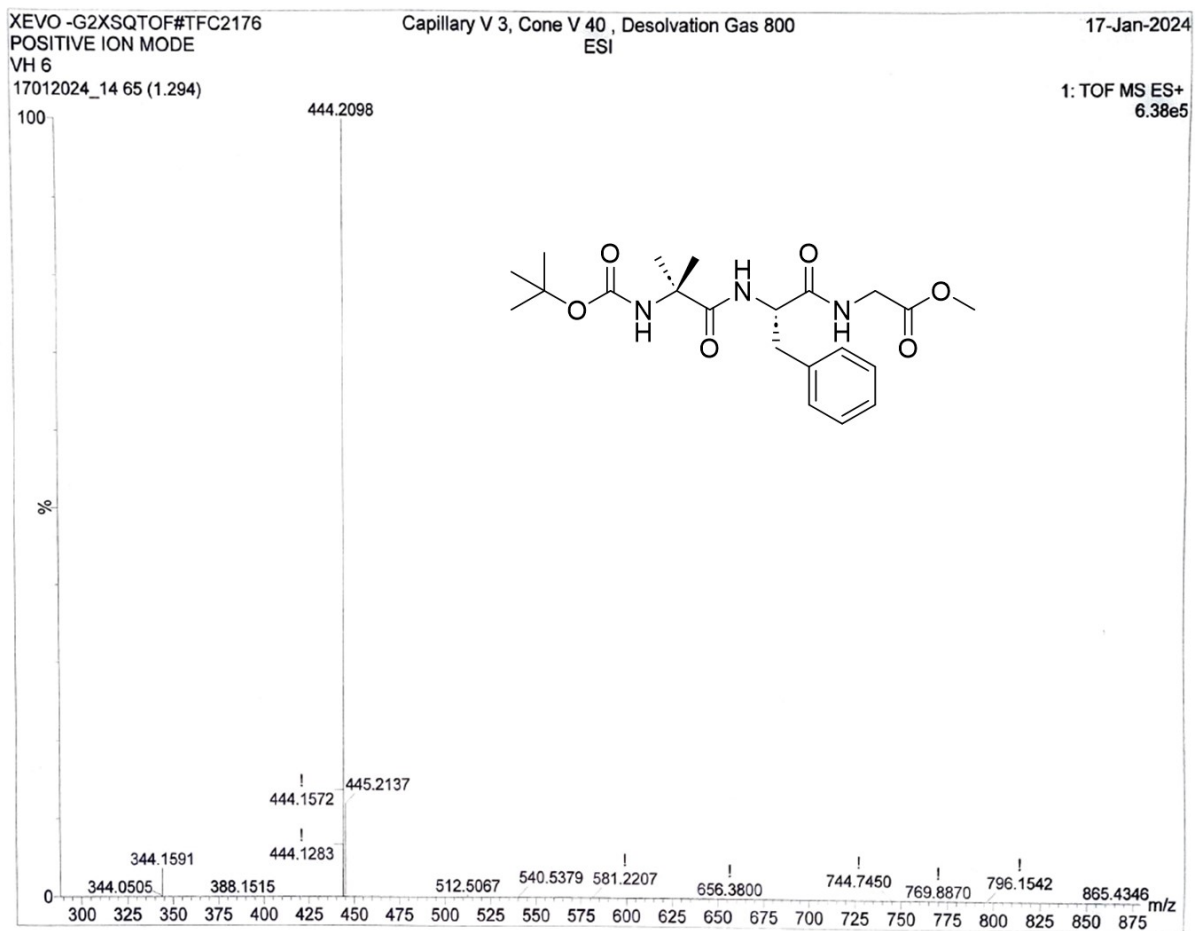

Figure S38: ESI-Mass spectrum of A6.

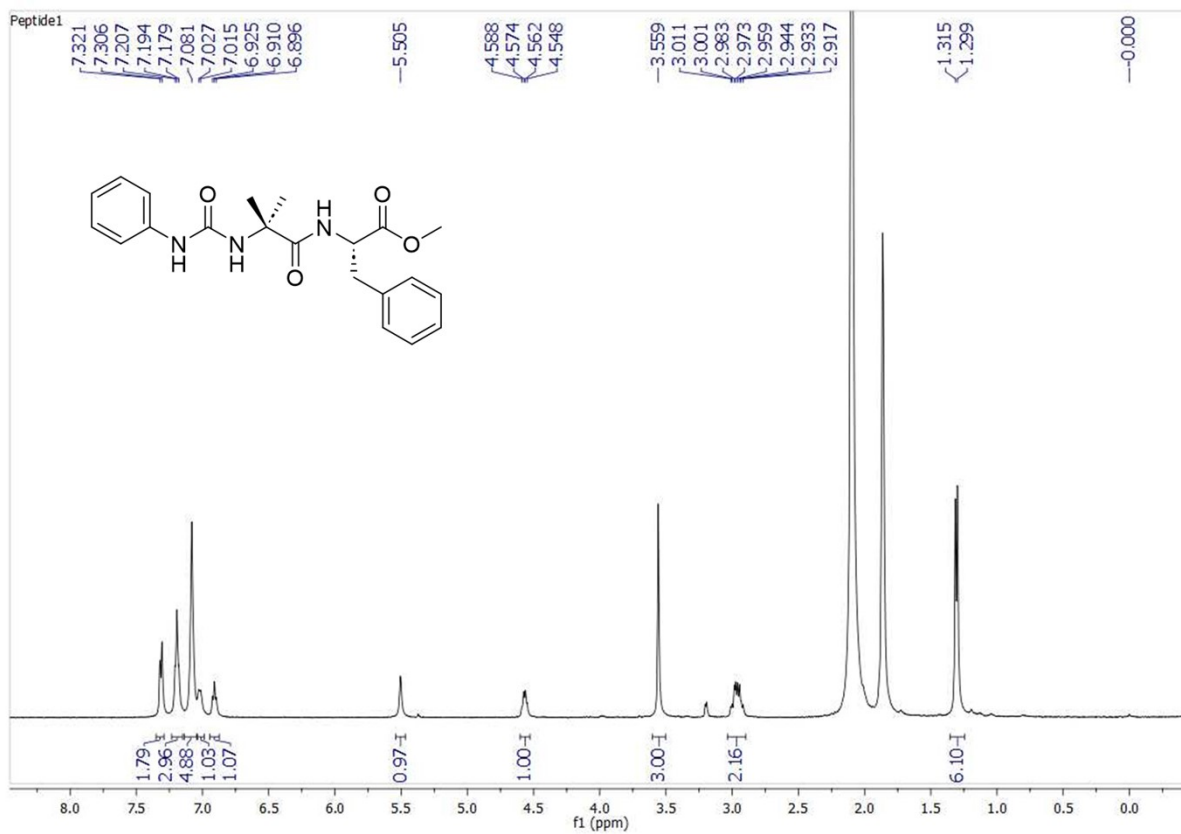

**Figure S39:**  $^1\text{H}$  NMR (500 MHz,  $\text{CD}_3\text{CN}$ ) spectrum of **1**.

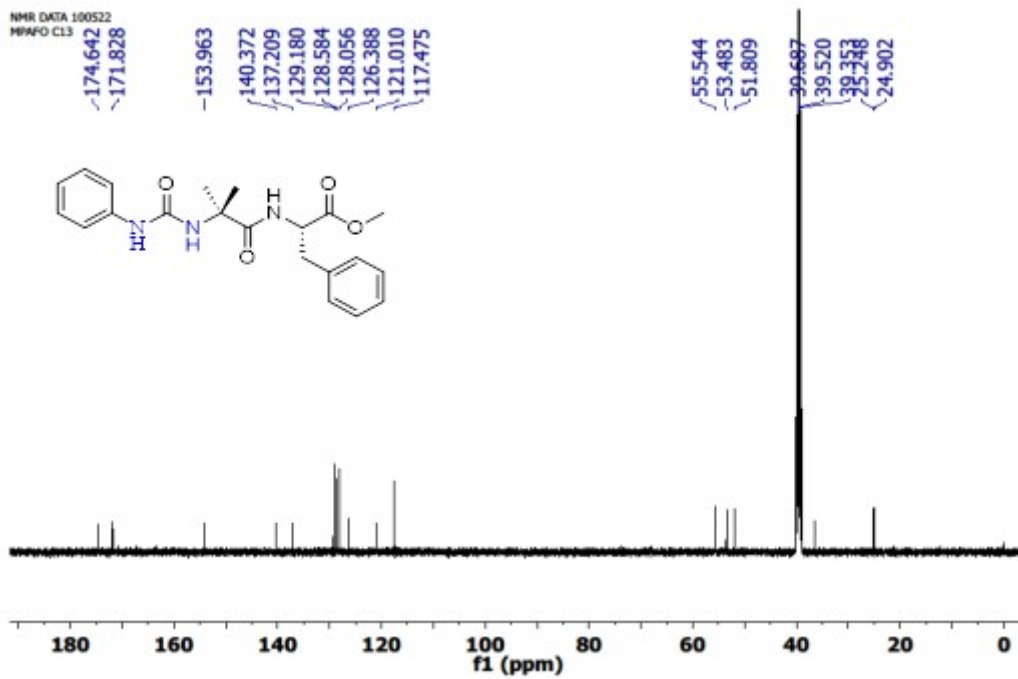

Figure S40:  $^{13}\text{C}$  NMR (125 MHz,  $\text{DMSO-}d_6$ ) spectrum of 1.

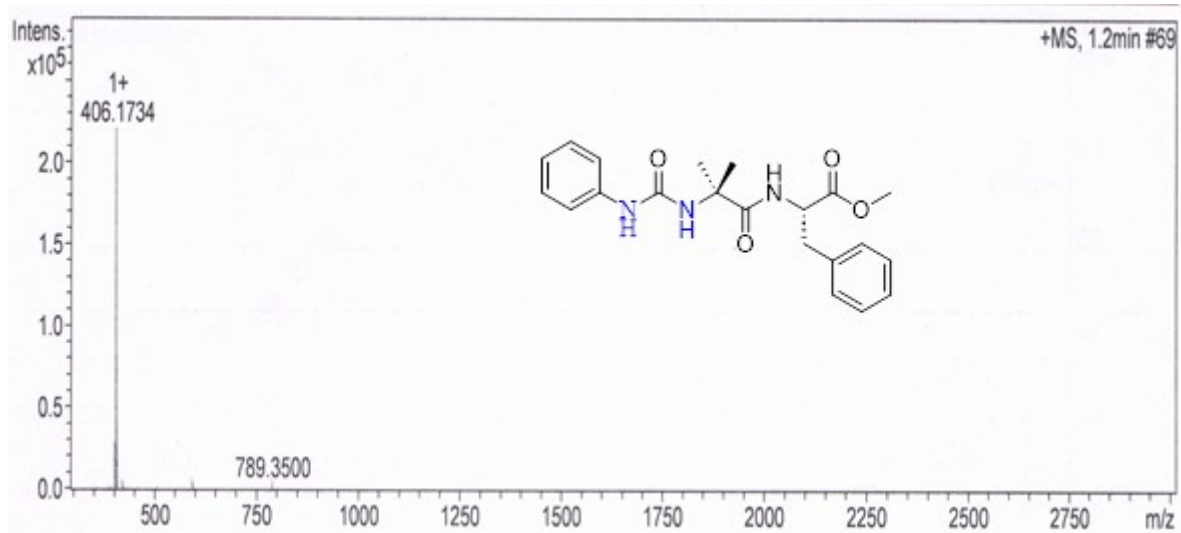

**Figure S41:** ESI-Mass spectrum of **1**.

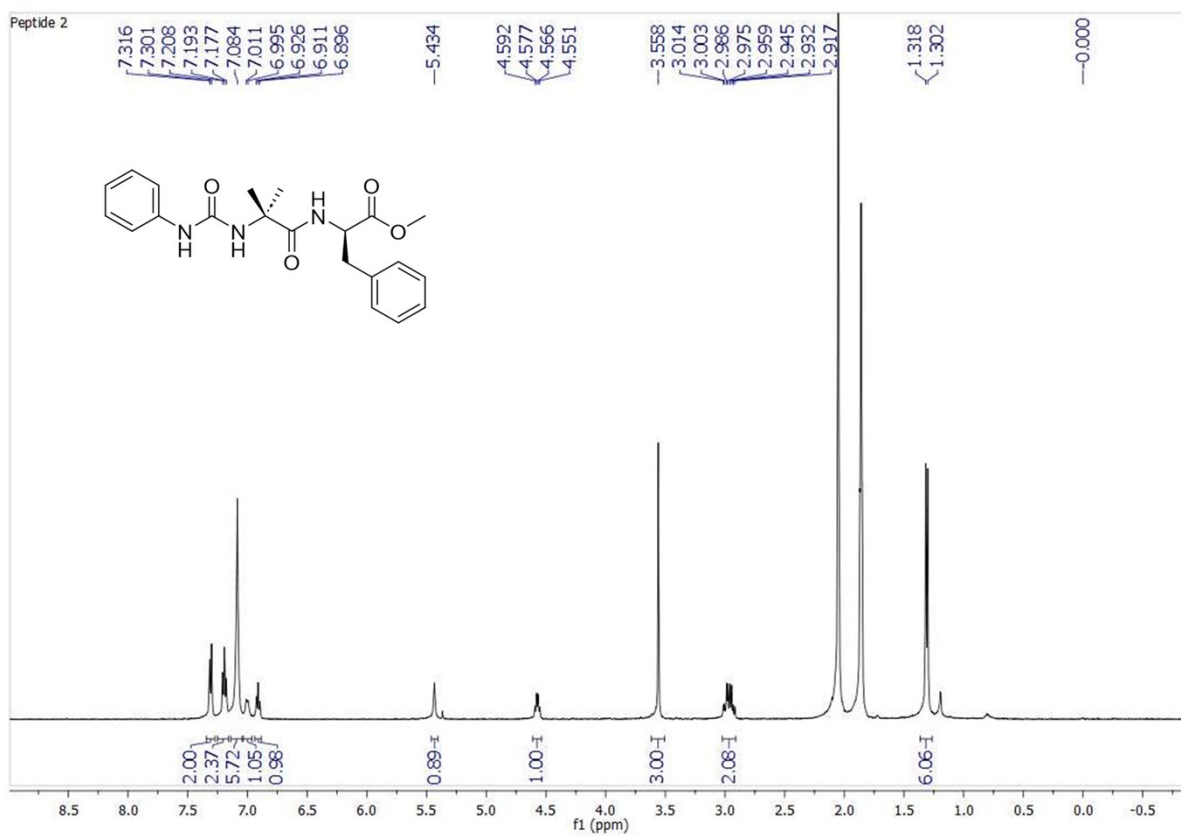

**Figure S42:**  $^1\text{H}$  NMR (500 MHz,  $\text{CD}_3\text{CN}$ ) spectrum of **2**.

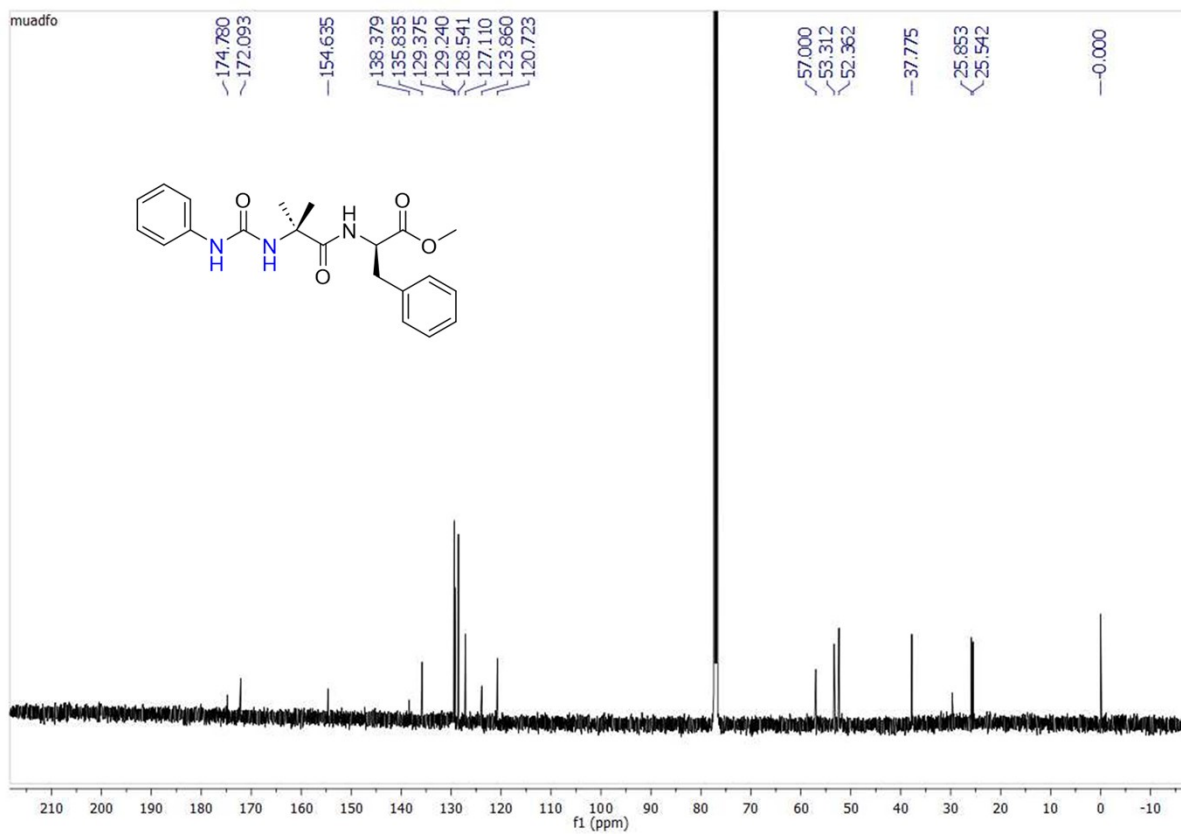

**Figure S43:**  $^{13}\text{C}$  NMR (500 MHz,  $\text{CDCl}_3$ ) spectrum of **2**.

XEVO-G2XSQTOF#TFC2176  
POSITIVE ION MODE  
VH MUA(d)FAO  
28062023\_02 26 (0.535)

Capillary V 3, Cone V 40, Desolvation Gas 800  
ESI

28-Jun-2023

1: TOF MS ES+  
1.85e6

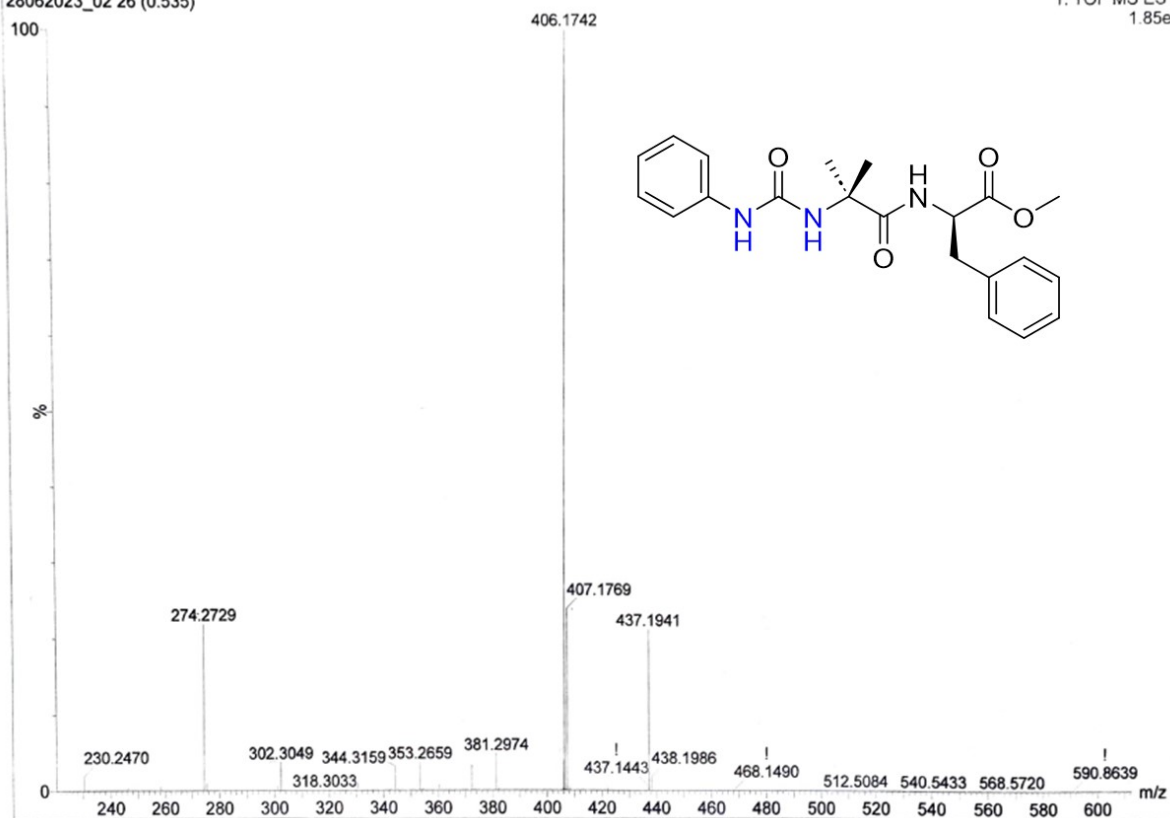

Figure S44: ESI-Mass spectrum of 2.

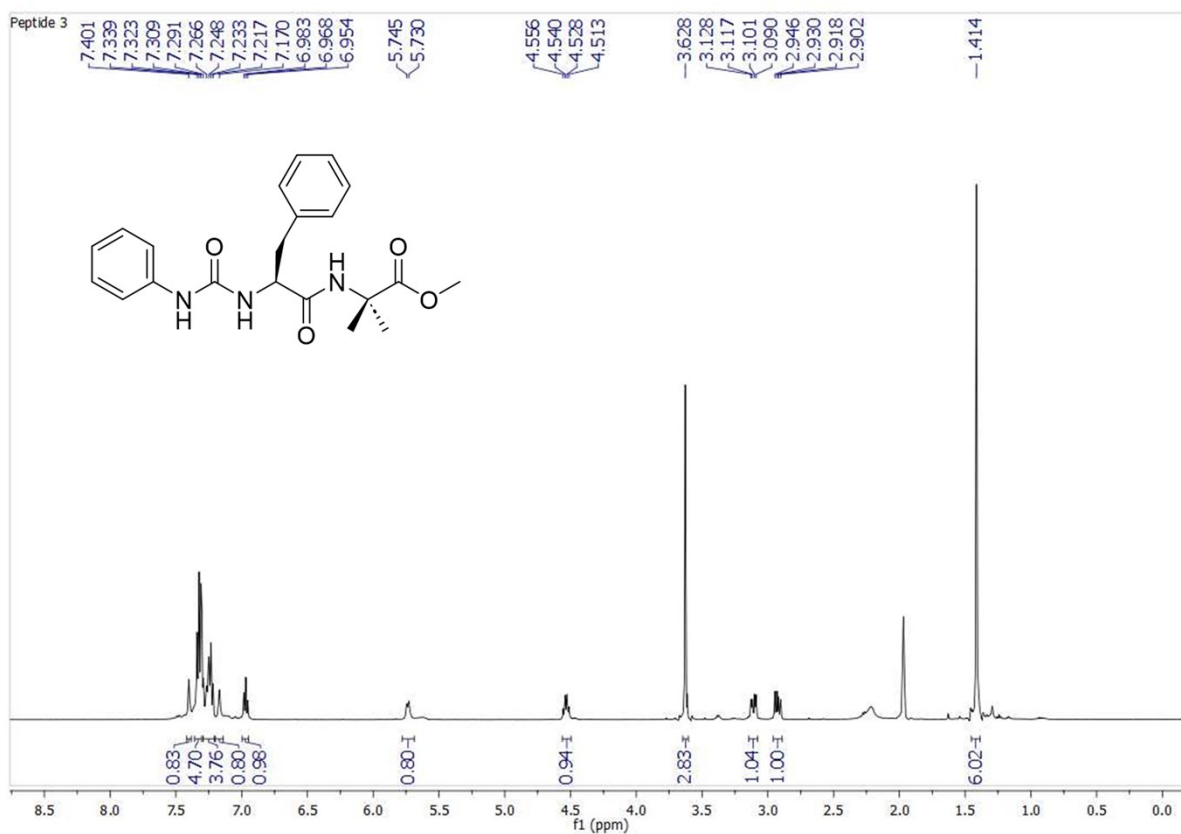

**Figure S45:**  $^1\text{H}$  NMR (500 MHz,  $\text{CDCl}_3$ ) spectrum of **3**.



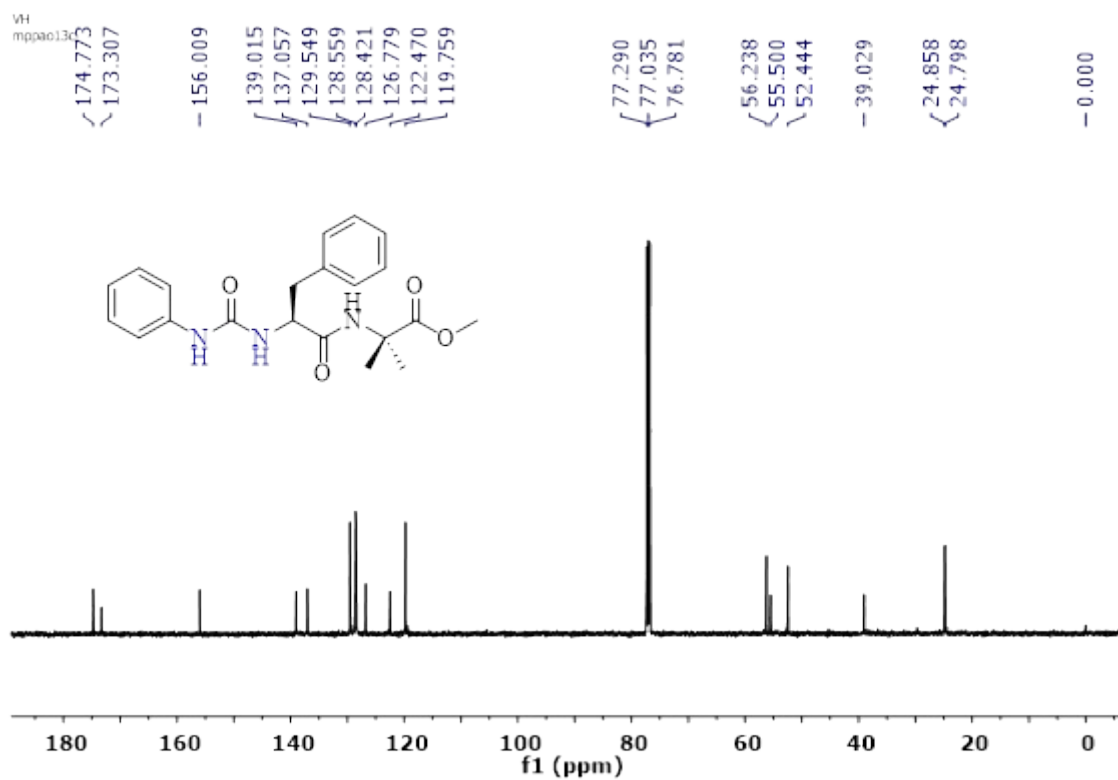

**Figure S46:**  $^{13}\text{C}$  NMR (125 MHz,  $\text{CDCl}_3$ ) spectrum of **3**.

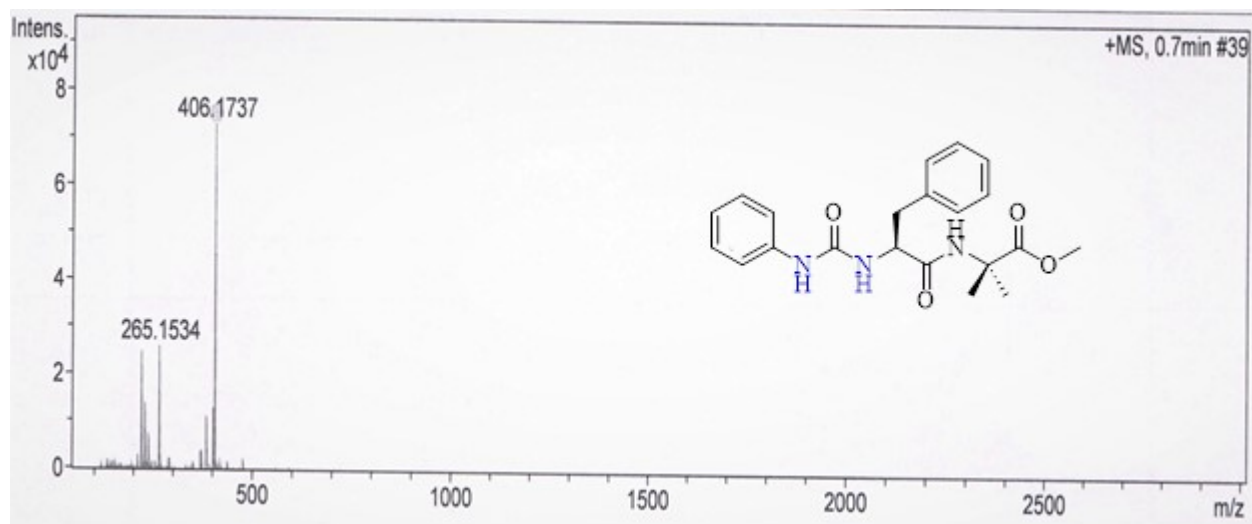

**Figure S47:** ESI-Mass spectrum of **3**.

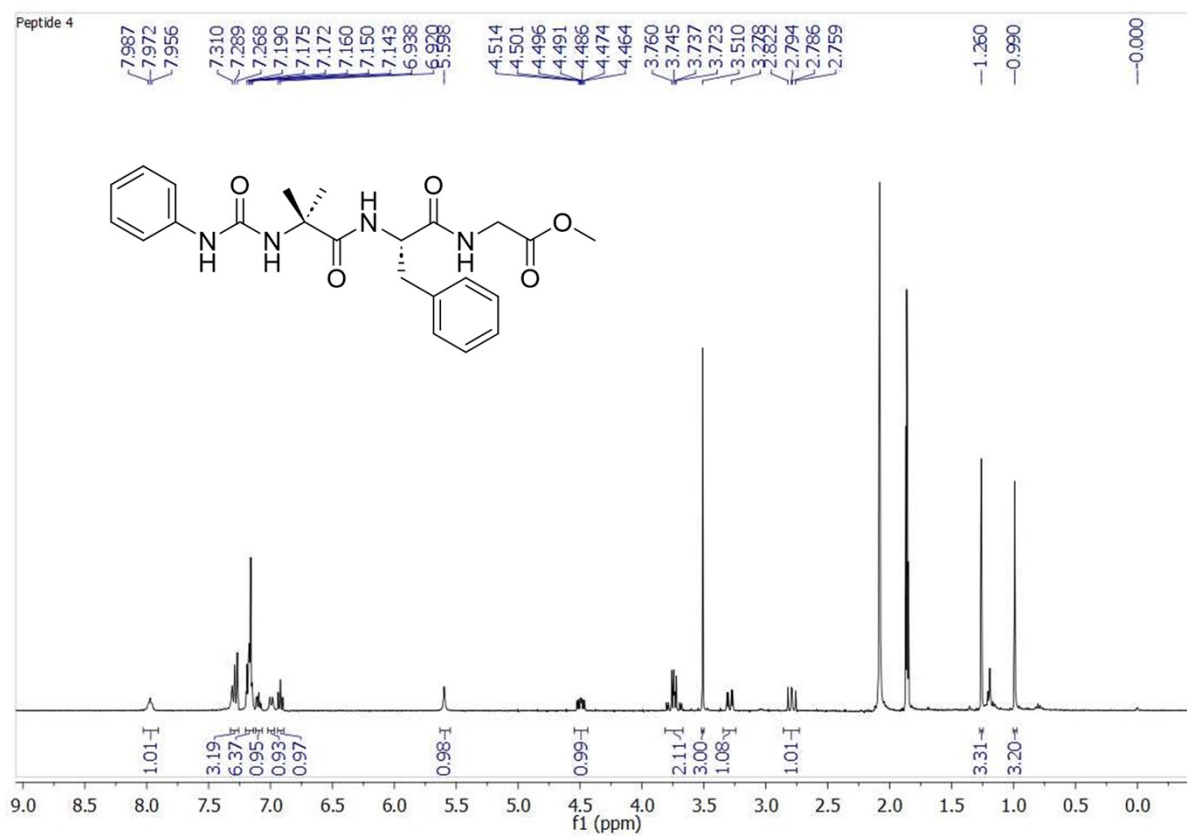

**Figure S48:**  $^1\text{H}$  NMR (500 MHz,  $\text{CD}_3\text{CN}$ ) spectrum of **4**.

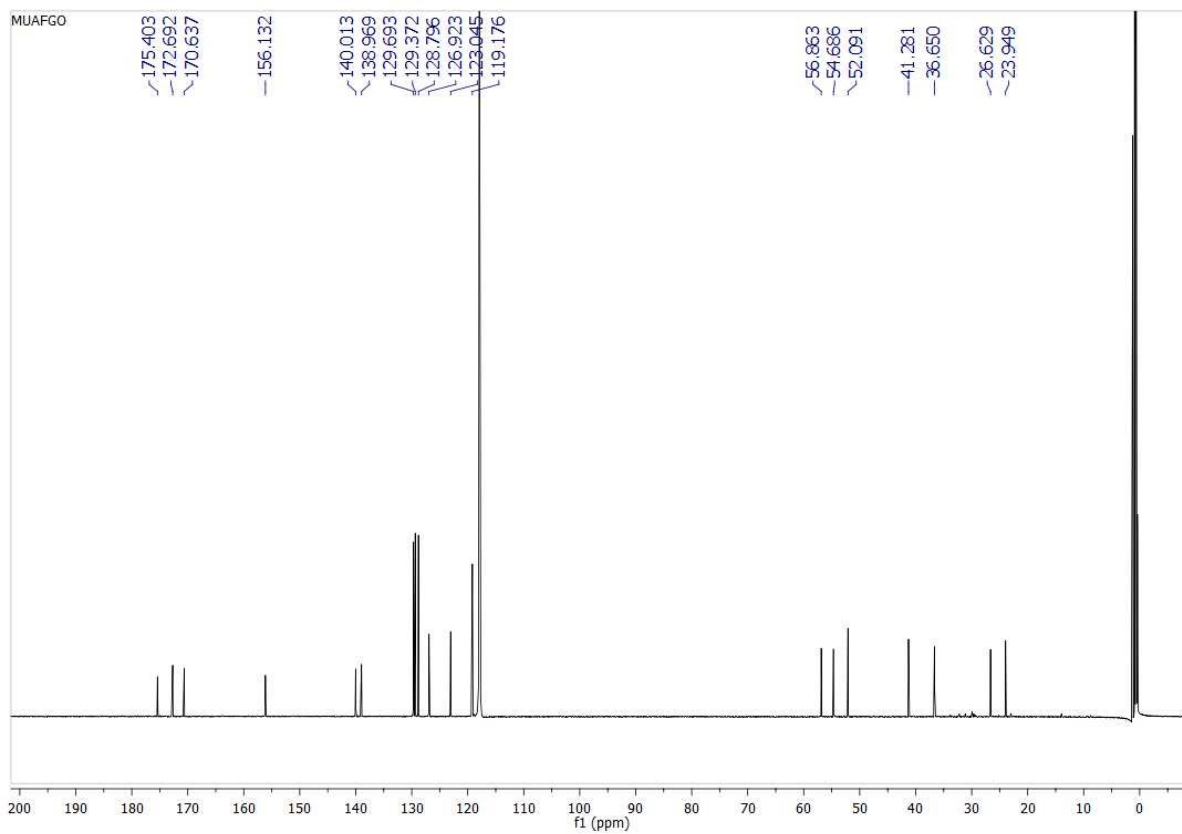

**Figure S49:**  $^{13}\text{C}$  NMR (125 MHz,  $\text{CD}_3\text{CN}$ ) spectrum of **4**.

XEVO-G2XSQTOF#TEC2176  
POSITIVE ION MODE  
VH MUAFGO

Capillary V 3, Cone V 40, Desolvation Gas 800  
ESI

11-Aug-2023

1: TOF MS ES+  
2.55e6

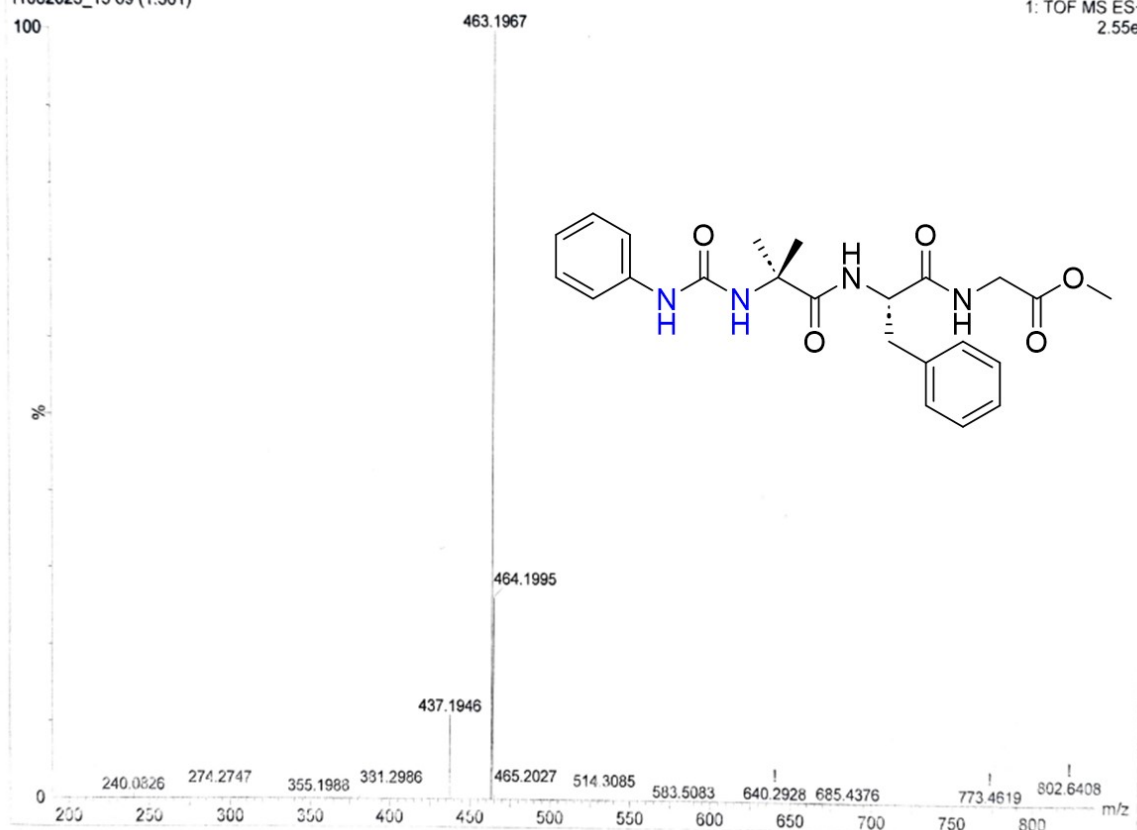

Figure S50: ESI-Mass spectrum of 4.

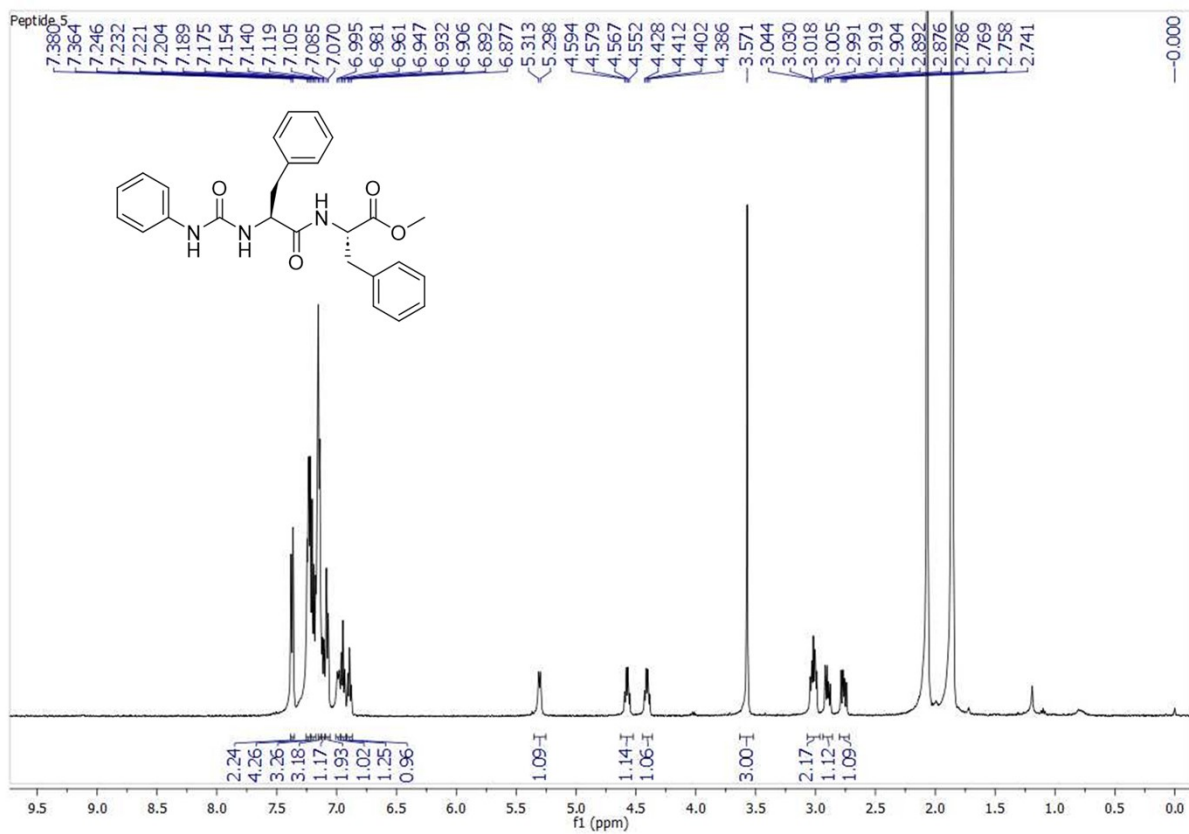

Figure S51:  $^1\text{H}$  NMR (500 MHz,  $\text{CD}_3\text{CN}$ ) spectrum of **5**.

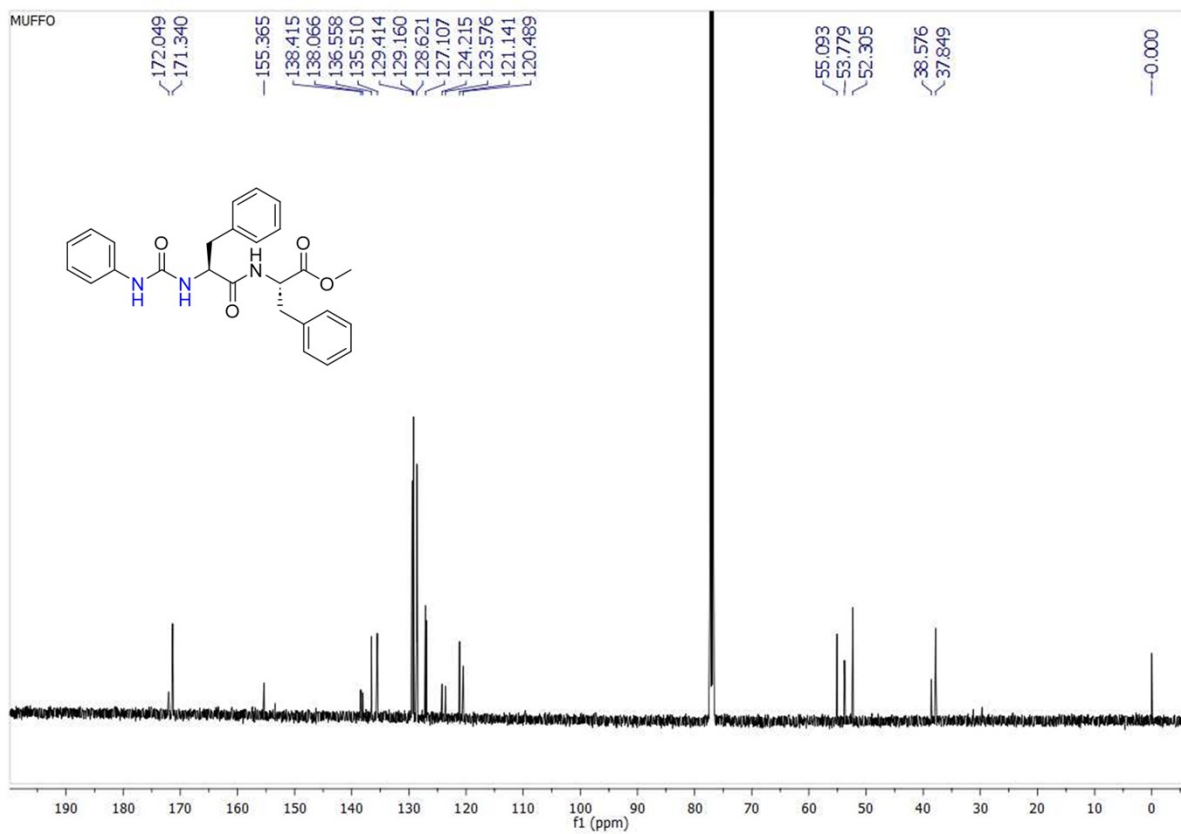

**Figure S52:** <sup>13</sup>C NMR (125 MHz, CDCl<sub>3</sub>) spectrum of **5**.

XEVO -G2XSQTOF#TFC2176  
POSITIVE ION MODE  
VH MUFFO  
22032023\_05 32 (0.637)

Capillary V 3, Cone V 40, Desolvation Gas 800  
ESI

22-Mar-2023

1: TOF MS ES+  
7.47e5

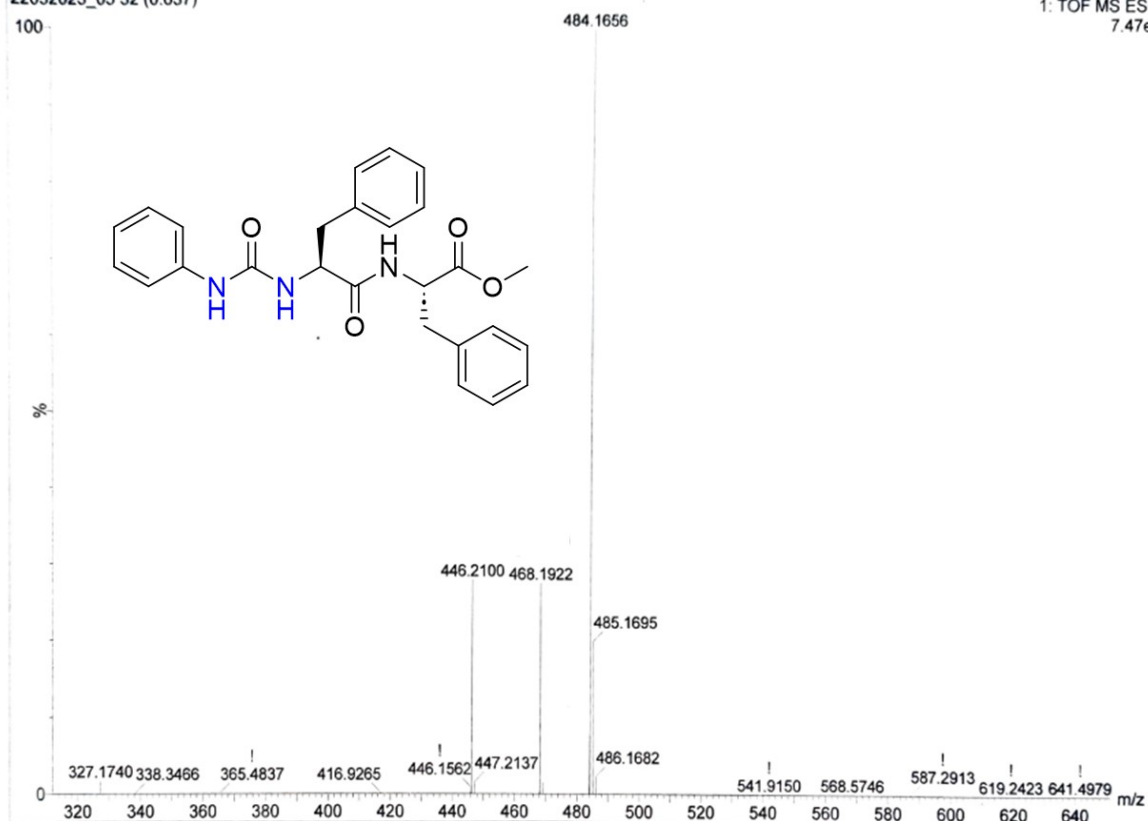

Figure S53: ESI-Mass spectrum of 5.



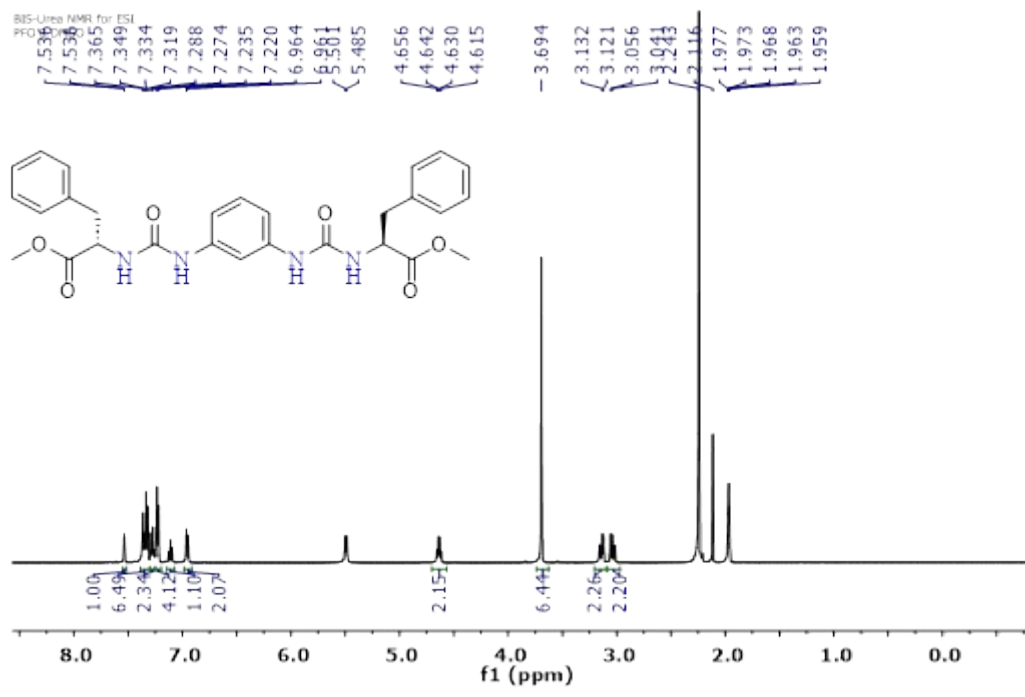

**Figure S54:** <sup>1</sup>H NMR (500 MHz, CD<sub>3</sub>CN) spectrum of **6**.

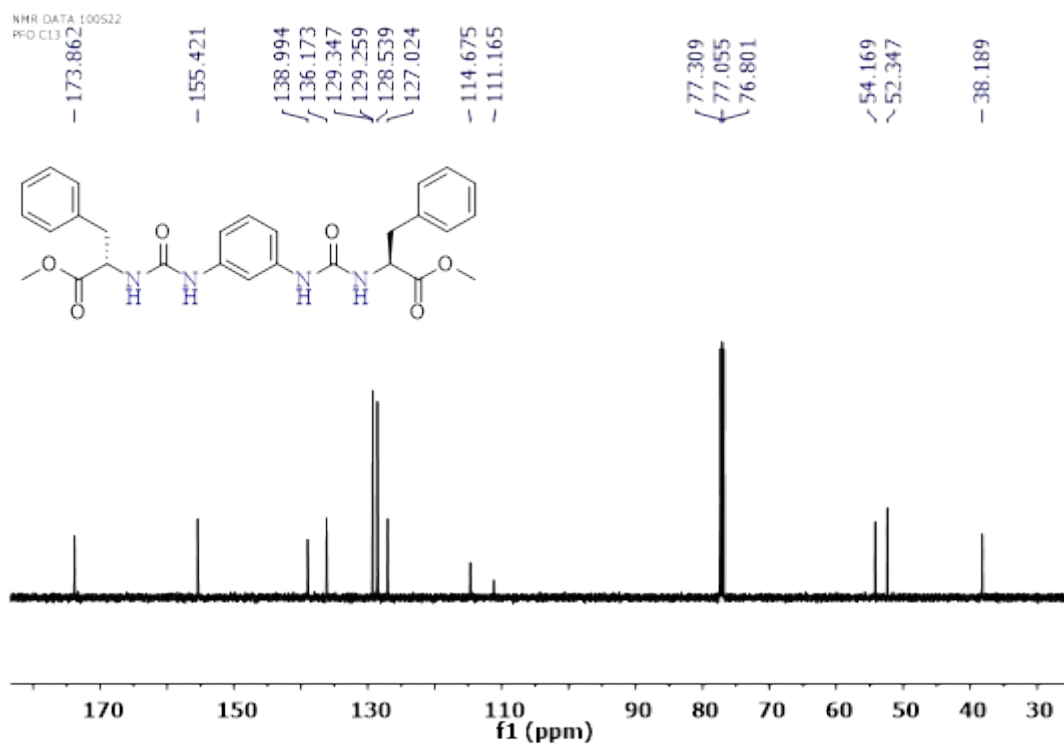

**Figure S55:**  $^{13}\text{C}$  NMR (125 MHz,  $\text{CDCl}_3$ ) spectrum of **6**.

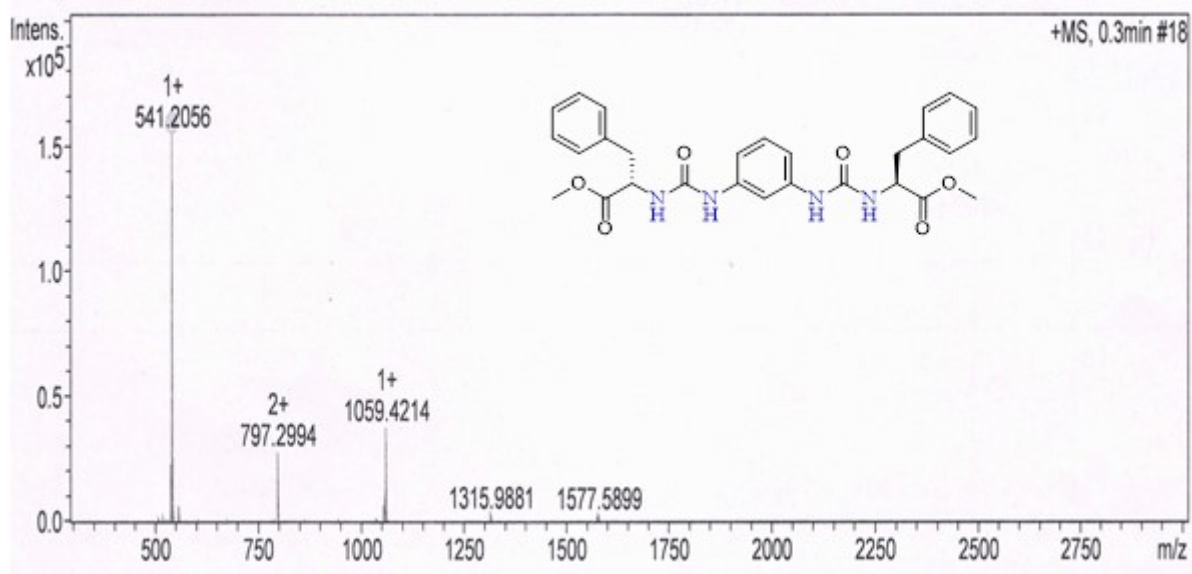

**Figure S56:** ESI-Mass spectrum of **6**.

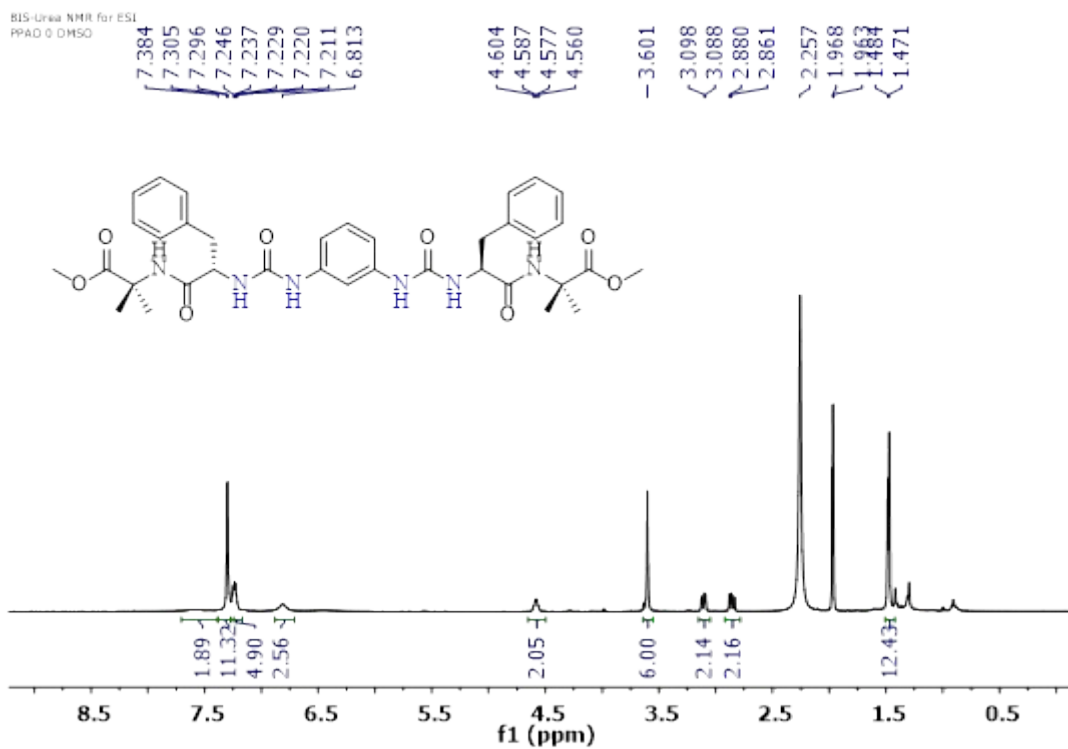

**Figure S57:**  $^1\text{H}$  NMR (500 MHz,  $\text{CD}_3\text{CN}$ ) spectrum of **7**.

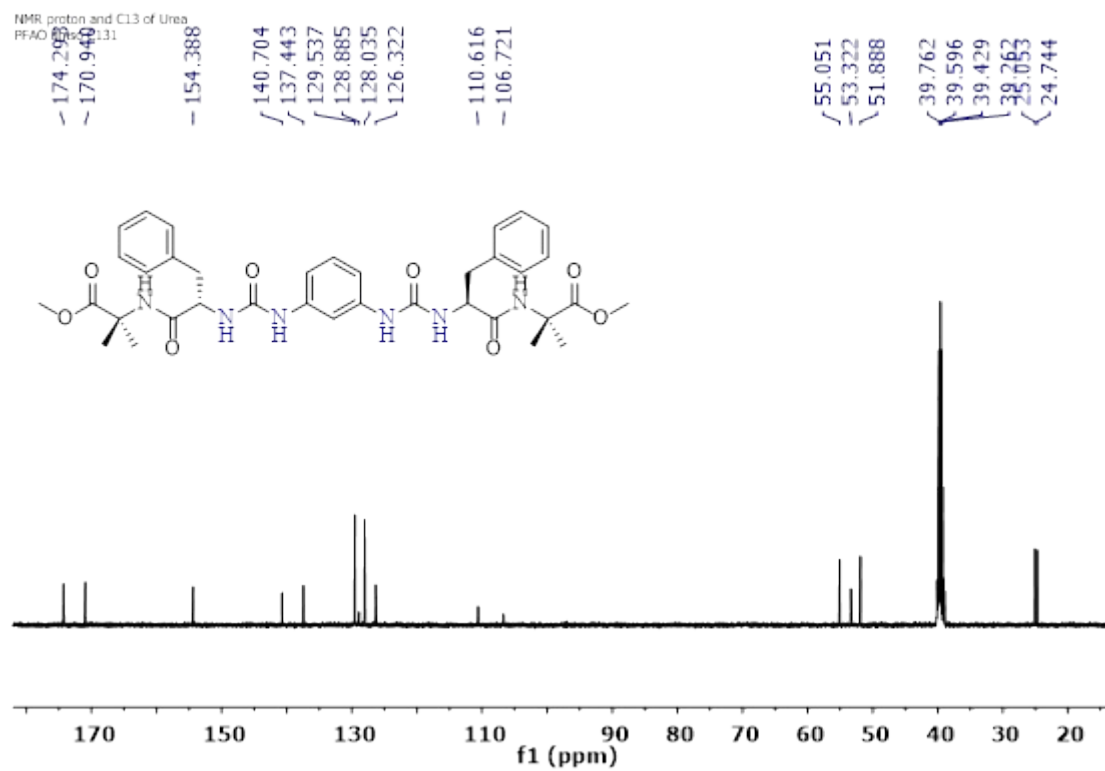

**Figure S58:**  $^{13}\text{C}$  NMR (125 MHz,  $\text{DMSO-}d_6$ ) spectrum of **7**.

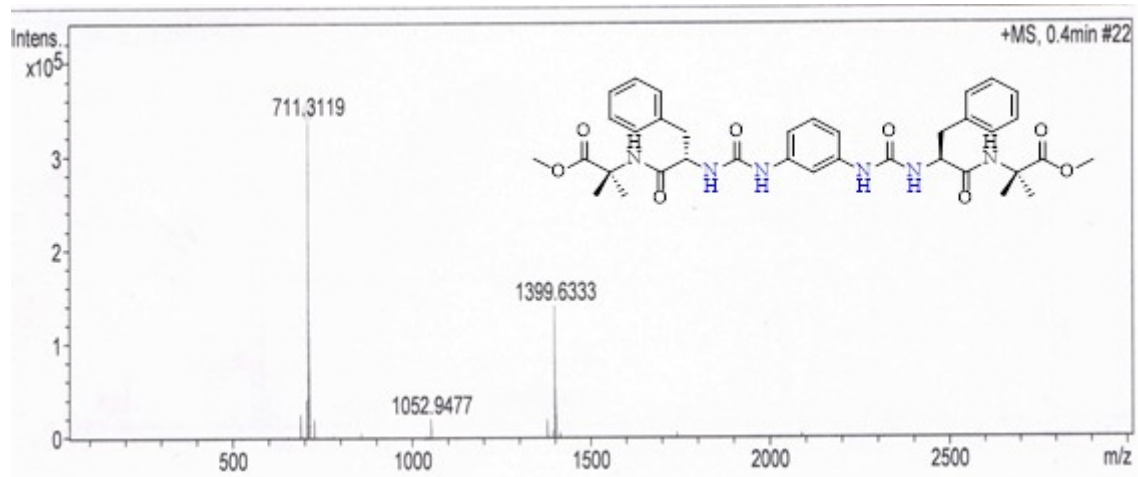

**Figure S59:** ESI-Mass spectrum of 7.

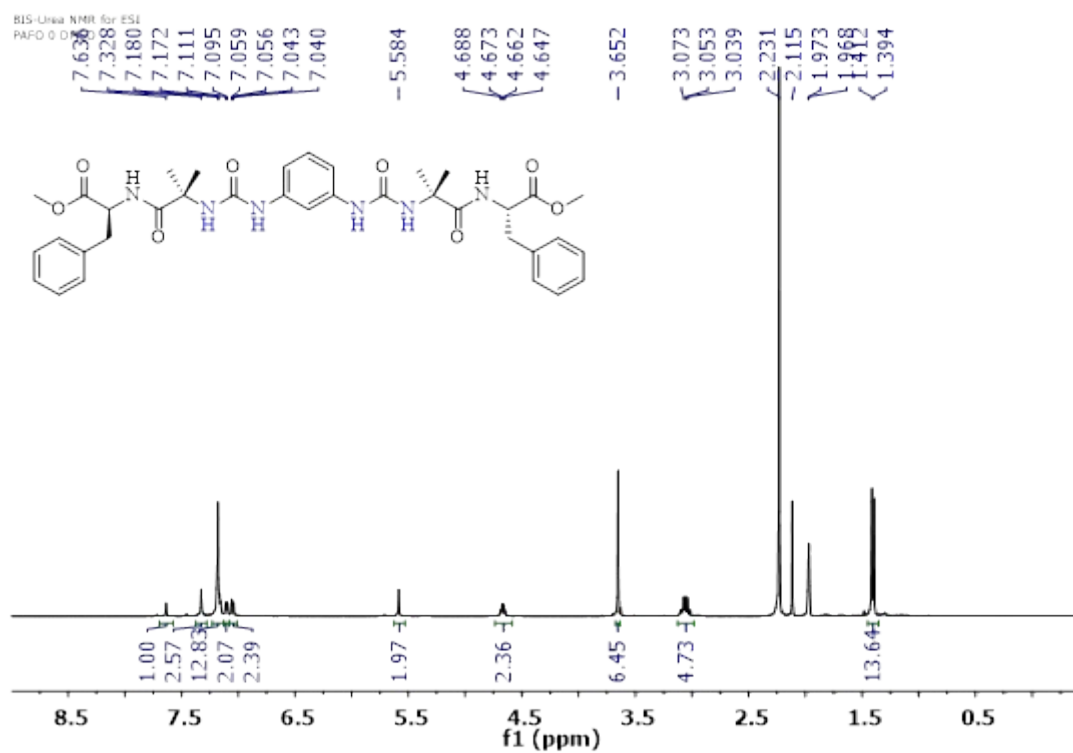

**Figure S60:**  $^1\text{H}$  NMR (500 MHz,  $\text{CD}_3\text{CN}$ ) spectrum of **8**.

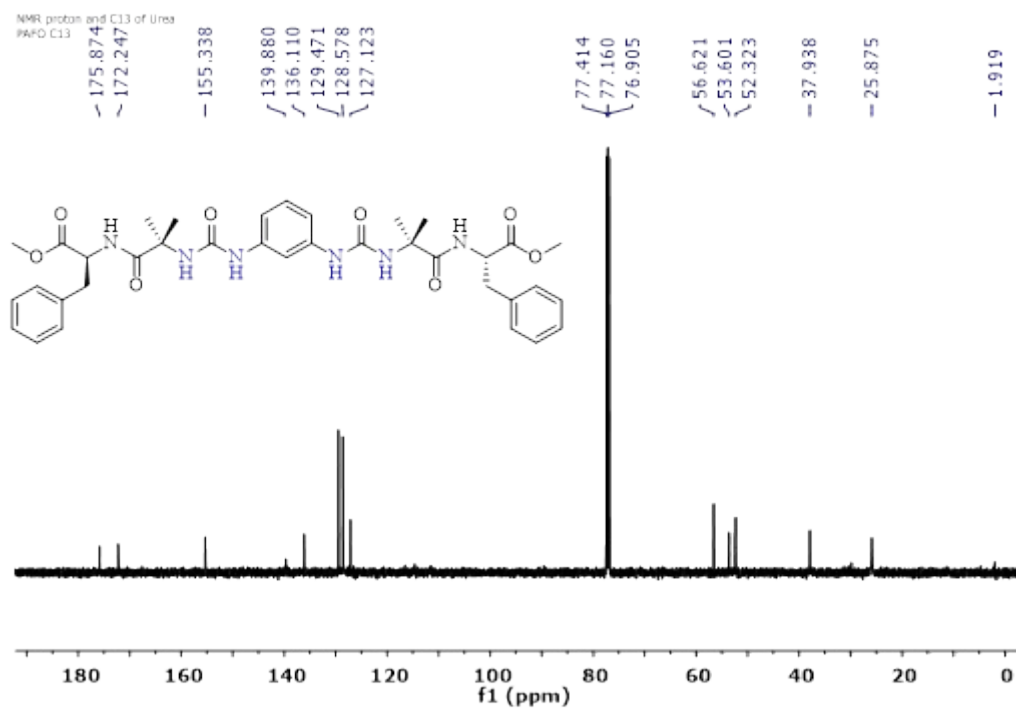

**Figure S61:**  $^{13}\text{C}$  NMR (125 MHz,  $\text{CDCl}_3$ ) spectrum of **8**.



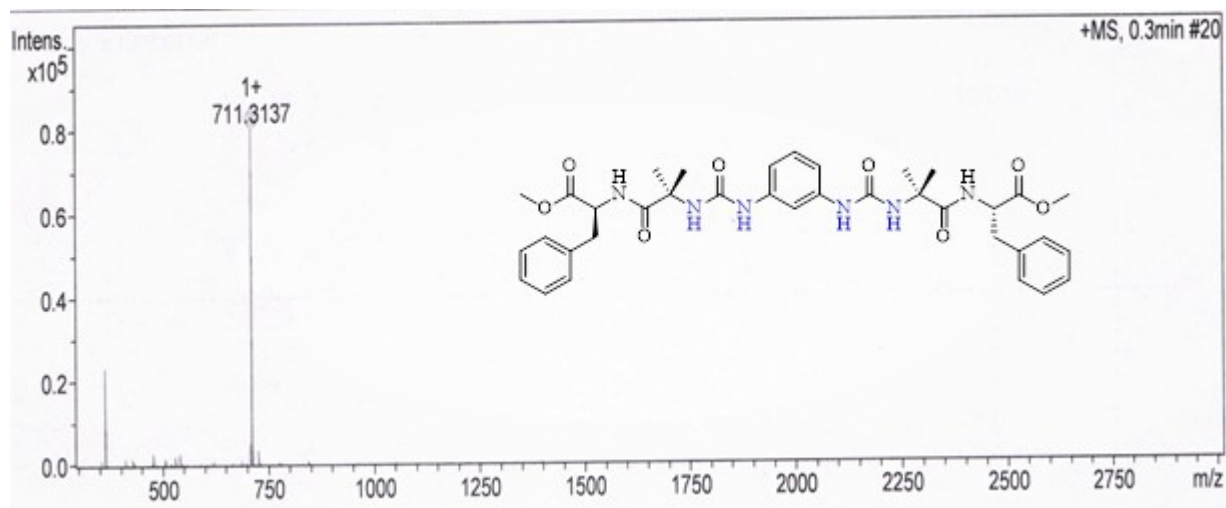

**Figure 62:** ESI-Mass spectrum of **8**.

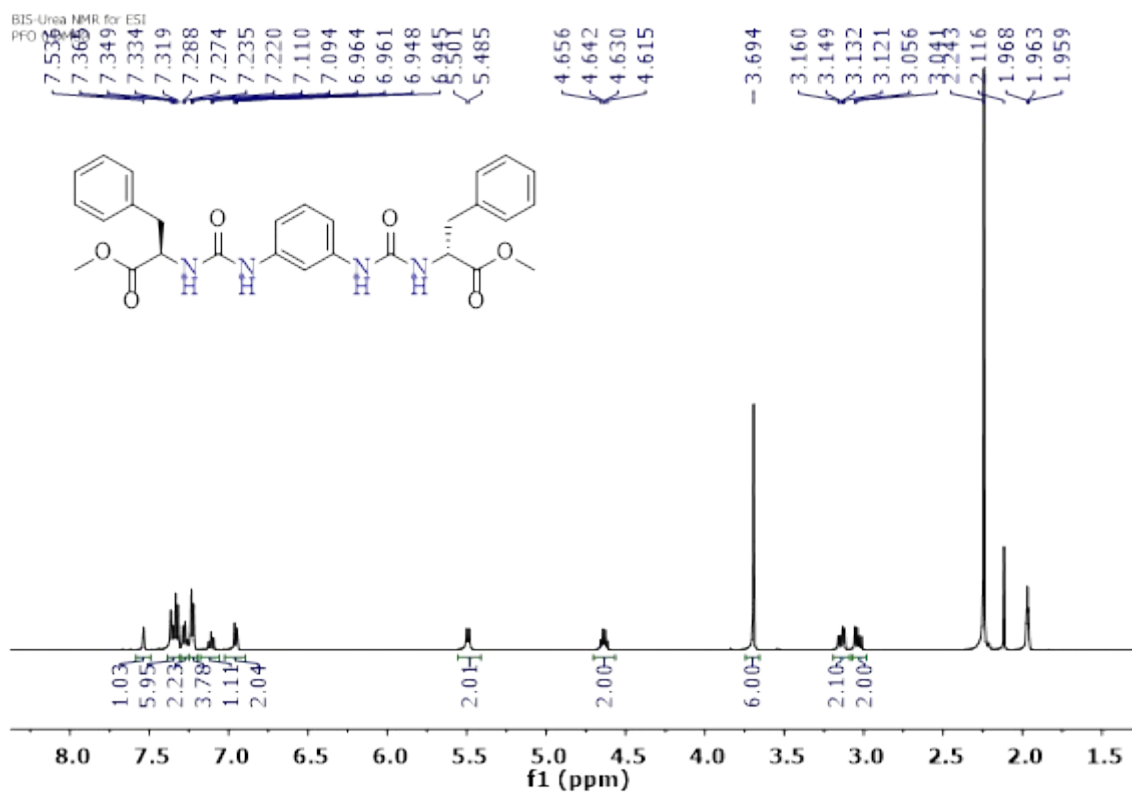

**Figure S63:**  $^1\text{H}$  NMR (500 MHz,  $\text{CD}_3\text{CN}$ ) spectrum of **9**.

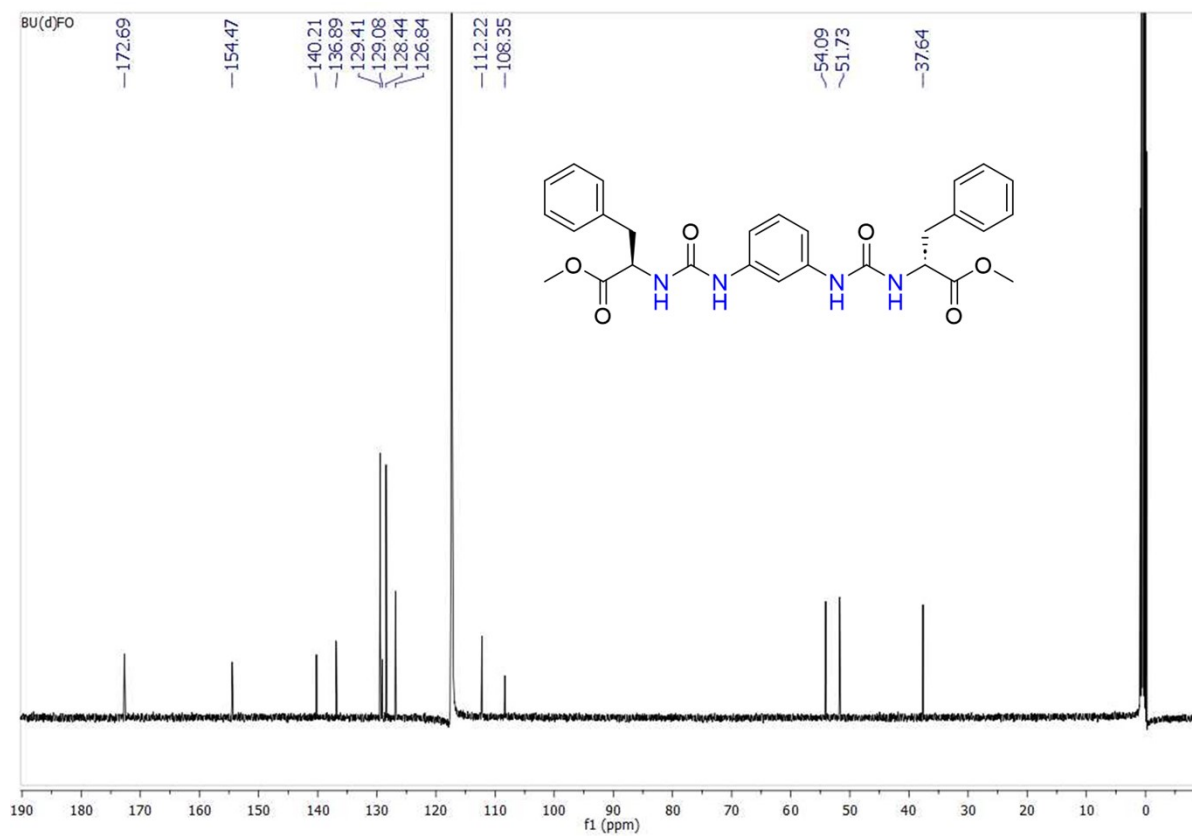

**Figure S64:**  $^{13}\text{C}$  NMR (125 MHz,  $\text{CD}_3\text{CN}$ ) spectrum of **9**.

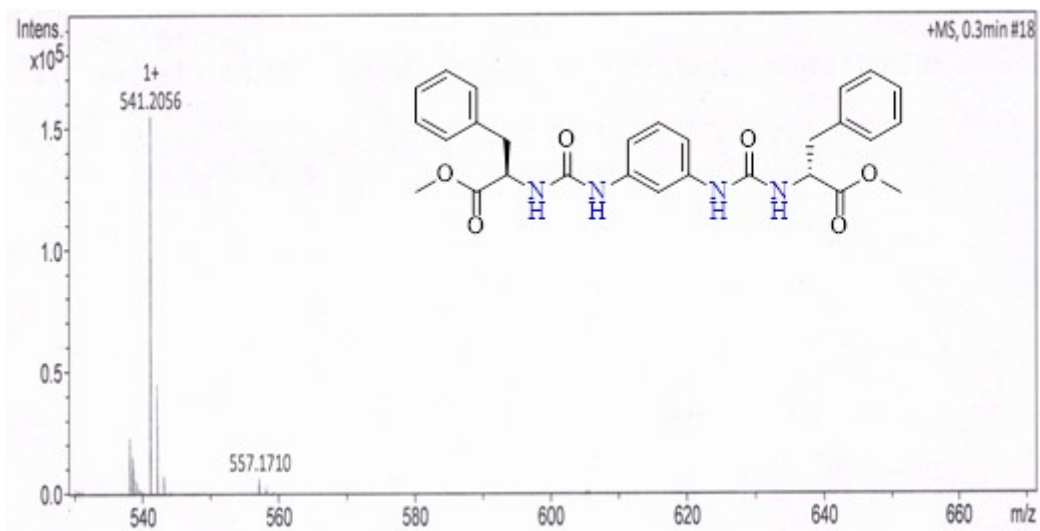

**Figure S65:** ESI-Mass spectrum of **9**.

**Table S1. Crystal data and structure refinement for peptide 1 (CCDC 2354491).**

|                                             |                                                               |
|---------------------------------------------|---------------------------------------------------------------|
| Identification code                         | AibFurea                                                      |
| Empirical formula                           | C <sub>21</sub> H <sub>25</sub> N <sub>3</sub> O <sub>4</sub> |
| Formula weight                              | 383.450                                                       |
| Temperature/K                               | 304.00                                                        |
| Crystal system                              | orthorhombic                                                  |
| Space group                                 | P2 <sub>1</sub> 2 <sub>1</sub> 2 <sub>1</sub>                 |
| a/Å                                         | 5.3552(6)                                                     |
| b/Å                                         | 11.2241(13)                                                   |
| c/Å                                         | 33.850(4)                                                     |
| α/°                                         | 90                                                            |
| β/°                                         | 90                                                            |
| γ/°                                         | 90                                                            |
| Volume/Å <sup>3</sup>                       | 2034.6(4)                                                     |
| Z                                           | 4                                                             |
| ρ <sub>calc</sub> /g/cm <sup>3</sup>        | 1.252                                                         |
| μ/mm <sup>-1</sup>                          | 0.088                                                         |
| F(000)                                      | 902.0                                                         |
| Radiation                                   | MoKα (λ = 0.71073)                                            |
| 2θ range for data collection/°              | 4.354 to 56.666                                               |
| Index ranges                                | -7 ≤ h ≤ 5, -14 ≤ k ≤ 14, -45 ≤ l ≤ 43                        |
| Reflections collected                       | 18534                                                         |
| Independent reflections                     | 5035 [R <sub>int</sub> = 0.0667, R <sub>sigma</sub> = 0.0689] |
| Data/restraints/parameters                  | 5035/0/262                                                    |
| Goodness-of-fit on F <sup>2</sup>           | 1.017                                                         |
| Final R indexes [I ≥ 2σ (I)]                | R <sub>1</sub> = 0.0532, wR <sub>2</sub> = 0.1078             |
| Final R indexes [all data]                  | R <sub>1</sub> = 0.1051, wR <sub>2</sub> = 0.1260             |
| Largest diff. peak/hole / e Å <sup>-3</sup> | 0.17/-0.21                                                    |
| Flack parameter                             | 0.2(10)                                                       |

**Table S2. Crystal data and structure refinement for peptide 2 (CCDC 2354492).**

|                                             |                                                               |
|---------------------------------------------|---------------------------------------------------------------|
| Identification code                         | dFAibUrea                                                     |
| Empirical formula                           | C <sub>21</sub> H <sub>25</sub> N <sub>3</sub> O <sub>4</sub> |
| Formula weight                              | 383.1845                                                      |
| Temperature/K                               | 302.00                                                        |
| Crystal system                              | orthorhombic                                                  |
| Space group                                 | P2 <sub>1</sub> 2 <sub>1</sub> 2 <sub>1</sub>                 |
| a/Å                                         | 5.3547(2)                                                     |
| b/Å                                         | 11.2231(4)                                                    |
| c/Å                                         | 33.8405(11)                                                   |
| α/°                                         | 90                                                            |
| β/°                                         | 90                                                            |
| γ/°                                         | 90                                                            |
| Volume/Å <sup>3</sup>                       | 2033.69(12)                                                   |
| Z                                           | 4                                                             |
| ρ <sub>calc</sub> /g/cm <sup>3</sup>        | 1.252                                                         |
| μ/mm <sup>-1</sup>                          | 0.088                                                         |
| F(000)                                      | 816.0                                                         |
| Radiation                                   | MoKα (λ = 0.71073)                                            |
| 2θ range for data collection/°              | 4.356 to 56.51                                                |
| Index ranges                                | -7 ≤ h ≤ 7, -13 ≤ k ≤ 14, -45 ≤ l ≤ 43                        |
| Reflections collected                       | 19171                                                         |
| Independent reflections                     | 5027 [R <sub>int</sub> = 0.0630, R <sub>sigma</sub> = 0.0691] |
| Data/restraints/parameters                  | 5027/0/256                                                    |
| Goodness-of-fit on F <sup>2</sup>           | 1.000                                                         |
| Final R indexes [I ≥ 2σ (I)]                | R <sub>1</sub> = 0.0508, wR <sub>2</sub> = 0.0994             |
| Final R indexes [all data]                  | R <sub>1</sub> = 0.1112, wR <sub>2</sub> = 0.1207             |
| Largest diff. peak/hole / e Å <sup>-3</sup> | 0.17/-0.18                                                    |
| Flack parameter                             | 0.7(9)                                                        |

**Table S3. Crystal data and structure refinement for peptide 5 (CCDC 2354493).**

|                                             |                                                               |
|---------------------------------------------|---------------------------------------------------------------|
| Identification code                         | FFUrea                                                        |
| Empirical formula                           | C <sub>26</sub> H <sub>27</sub> N <sub>3</sub> O <sub>4</sub> |
| Formula weight                              | 445.51                                                        |
| Temperature/K                               | 150(2)                                                        |
| Crystal system                              | hexagonal                                                     |
| Space group                                 | P6 <sub>5</sub>                                               |
| a/Å                                         | 12.7958(3)                                                    |
| b/Å                                         | 12.7958(3)                                                    |
| c/Å                                         | 26.2968(12)                                                   |
| α/°                                         | 90                                                            |
| β/°                                         | 90                                                            |
| γ/°                                         | 120                                                           |
| Volume/Å <sup>3</sup>                       | 3728.8(2)                                                     |
| Z                                           | 6                                                             |
| ρ <sub>calc</sub> /g/cm <sup>3</sup>        | 1.190                                                         |
| μ/mm <sup>-1</sup>                          | 0.081                                                         |
| F(000)                                      | 1416.0                                                        |
| Radiation                                   | MoKα (λ = 0.71073)                                            |
| 2θ range for data collection/°              | 3.988 to 52.768                                               |
| Index ranges                                | -16 ≤ h ≤ 16, -16 ≤ k ≤ 16, -32 ≤ l ≤ 32                      |
| Reflections collected                       | 166845                                                        |
| Independent reflections                     | 5074 [R <sub>int</sub> = 0.0811, R <sub>sigma</sub> = 0.0216] |
| Data/restraints/parameters                  | 5074/1/299                                                    |
| Goodness-of-fit on F <sup>2</sup>           | 1.057                                                         |
| Final R indexes [I ≥ 2σ (I)]                | R <sub>1</sub> = 0.0331, wR <sub>2</sub> = 0.0791             |
| Final R indexes [all data]                  | R <sub>1</sub> = 0.0385, wR <sub>2</sub> = 0.0830             |
| Largest diff. peak/hole / e Å <sup>-3</sup> | 0.23/-0.15                                                    |
| Flack parameter                             | 0.1(3)                                                        |

**Table S4. Table showing CSI values of peptide 1, 2 and 8**

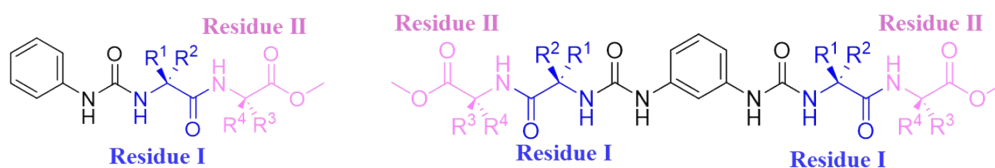

| Compounds | $\delta$ (obs)             |                             | Reference<br>$\delta$ | Residue<br>II<br>$\Delta \delta$ | Chemical<br>Shift<br>Index |
|-----------|----------------------------|-----------------------------|-----------------------|----------------------------------|----------------------------|
|           | Residue I<br>$C_{\alpha}H$ | Residue II<br>$C_{\alpha}H$ |                       |                                  |                            |
| Peptide 1 | X*                         | 4.57                        | $4.66 \pm 0.10$       | 0.09                             | 0                          |
| Peptide 2 | X                          | 4.57                        | $4.66 \pm 0.10$       | 0.09                             | 0                          |
| Peptide 8 | X                          | 4.67                        | $4.66 \pm 0.10$       | 0.01                             | 0                          |

\* 'X' denotes residue doesn't contain  $C_{\alpha}H$ .

**Table S5. H-bonding distances (Å) and angles (°) present in peptide 1**

| Donor (D) | H Label<br>(H) | Acceptor<br>(A) | DH...A (Å) | D...A (Å) | $\angle D...H...A$ angle<br>(°) |
|-----------|----------------|-----------------|------------|-----------|---------------------------------|
| N1        | H1             | O1              | 2.299      | 3.142     | 157.34                          |
| N2        | H2             | O3              | 2.159      | 2.825     | 134.01                          |
| N3        | H3             | O4              | 2.343      | 2.675     | 103.92                          |
